# Supplementary material for: Relationship between stress-related psychosocial work factors and suboptimal health among Chinese medical staff: a cross-sectional study
Source: PubMed Central journal article supplement — BMJ Open. 2018 Mar 6;8(3):e018485. doi: 10.1136/bmjopen-2017-018485 (PMC5855386; doi:10.1136/bmjopen-2017-018485), 2018-03-06
Supplement: bmjopen-2017-018485.draft_revisions.pdf [file bmjopen-2017-018485.draft_revisions.pdf]

# BMJ Open

BMJ Open is committed to open peer review. As part of this commitment we make the peer review history of every article we publish publicly available.

When an article is published we post the peer reviewers' comments and the authors' responses online. We also post the versions of the paper that were used during peer review. These are the versions that the peer review comments apply to.

The versions of the paper that follow are the versions that were submitted during the peer review process. They are not the versions of record or the final published versions. They should not be cited or distributed as the published version of this manuscript.

BMJ Open is an open access journal and the full, final, typeset and author-corrected version of record of the manuscript is available on our site with no access controls, subscription charges or pay-per-view fees (<http://bmjopen.bmj.com>).

If you have any questions on BMJ Open's open peer review process please email [editorial.bmjopen@bmj.com](mailto:editorial.bmjopen@bmj.com)

# BMJ Open

## Psychosocial Stress at Work and Suboptimal Health among Medical Staff: Confirmative Factor Analysis

|                                 |                                                                                                                                                                                                                                        |
|---------------------------------|----------------------------------------------------------------------------------------------------------------------------------------------------------------------------------------------------------------------------------------|
| Journal:                        | <i>BMJ Open</i>                                                                                                                                                                                                                        |
| Manuscript ID                   | bmjopen-2017-018485                                                                                                                                                                                                                    |
| Article Type:                   | Research                                                                                                                                                                                                                               |
| Date Submitted by the Author:   | 04-Jul-2017                                                                                                                                                                                                                            |
| Complete List of Authors:       | Liang, Yingzhi<br>Meng, Shijiao<br>Zhang, Jie<br>Yan, Yuxiang; Capital Medical University, Department of Epidemiology and Biostatistics; Capital Medical University, Municipal Key Laboratory of Clinical Epidemiology, Beijing, China |
| <b>Primary Subject Heading</b>: | Mental health                                                                                                                                                                                                                          |
| Secondary Subject Heading:      | Epidemiology, Occupational and environmental medicine, Research methods                                                                                                                                                                |
| Keywords:                       | Psychosocial Stress, Suboptimal Health, Medical Staff, Confirmative Factor Analysis                                                                                                                                                    |
|                                 |                                                                                                                                                                                                                                        |

SCHOLARONE™  
Manuscripts

1  
2  
3  
4  
5  
6  
7  
8  
9  
10  
11  
12  
13  
14  
15  
16  
17  
18  
19  
20  
21  
22  
23  
24  
25  
26  
27  
28  
29  
30  
31  
32  
33  
34  
35  
36  
37  
38  
39  
40  
41  
42  
43  
44  
45  
46  
47  
48  
49  
50  
51  
52  
53  
54  
55  
56  
57  
58  
59  
60

# Psychosocial Stress at Work and Suboptimal Health among Medical Staff: Confirmative Factor Analysis

Yingzhi Liang<sup>1, 2, †</sup>, Shijiao Meng<sup>3, †</sup>, Jie Zhang<sup>1, 2</sup> and Yuxiang Yan<sup>1, 2, \*</sup>

<sup>1</sup> Department of Epidemiology and Biostatistics, School of Public Health, Capital Medical University, Beijing, China

<sup>2</sup> Municipal Key Laboratory of Clinical Epidemiology, Beijing, China

<sup>3</sup> Department of Education, Tiantan Hospital, Capital Medical University, Beijing, China

† These two authors contributed equally to the article.

\* Corresponding author

Address: Department of Epidemiology and Biostatistics, School of Public Health, Capital Medical University, No.10 Xitoutiao, You An Men, Beijing, 100069 P.R.China.

Tel: 86-010-83911498, Fax: 86-010-83911498, Email: [yanyxepi@163.com](mailto:yanyxepi@163.com)

**Abstract**

**Objectives** To develop and validate a model to measure psychosocial work stress among medical staff in China based on confirmatory factor analysis. The second aim of the current study was to clarify the association between psychosocial work stress and suboptimal health status.

**Design** The cross-sectional study was conducted by clustered sampling method.

**Setting** Xuanwu Hospital, a 3A Grade Hospital, in Beijing province.

**Participants** nine hundred and fourteen medical staff aged over 40 years were sampled. Seven hundred and ninety-seven valid questionnaires were collected and used for further analysis. The sample included 94% of the Han population.

**Main outcome measures** The Copenhagen Psychosocial Questionnaire (COPSOQ) and Suboptimal Health Status Questionnaires-25 (SHSQ-25) were used to assess the psychosocial factors at work and suboptimal health status, respectively. Confirmative Factor Analysis (CFA) was conducted to establish the evaluating method of COPSOQ. A multivariate logistic regression model was used to estimate the relationship between suboptimal health status and psychosocial work stress among Chinese medical staff.

**Results** There was strong correlation among the five dimensions of COPSOQ based on the first-order factor model. And the second-order factor model fit well and then we established two second-order factors, negative and positive psychosocial work factor, to evaluate psychosocial stress at work. The high score of negative (OR (95% CI) = 1.47 (1.34 to 1.62),  $p < 0.001$ ) and positive psychosocial work factor (OR (95% CI) = 0.96 (0.94 to 0.98),  $p < 0.001$ ) increased and decreased the risk of suboptimal health, respectively. This relationship remained statistically significant after adjusting for confounders and when using different cut-offs of SHS.

**Conclusions** Among medical staff, the second-order factor model was a suitable method to evaluate psychosocial work stress. The negative and positive psychosocial work stress might be the risk and protective factor of suboptimal health, respectively. Moreover, negative psychosocial work stress was the most associated factors to predict suboptimal health.

1 This is an Open Access article distributed in accordance with the Creative Commons Attribution Non Commercial (CC BY-NC  
2  
3 4.0) license, which permits others to distribute, remix, adapt, build upon this work non-commercially, and license their derivative  
4  
5 works on different terms, provided the original work is properly cited and the use is non-commercial. See:  
6  
7 <http://creativecommons.org/licenses/by-nc/4.0/>  
8  
9

### 10 11 12 13 14 15 16 17 18 **Strengths and limitations of this study** 19

- 20 ● The study had high internal validity, with a good representation of medical staff.
- 21  
22 ● To assessment psychosocial work stress among medical staff, a more parsimonious, modified second-factor model was  
23  
24 finally built to replace the traditional method of calculating the average value of the COPSOQ which ignored the effect  
25  
26 of each item.  
27  
28
- 29 ● The study was conducted in Beijing (a dense city), adding evidence on these issues in a different context than the  
30  
31 current literature.  
32  
33
- 34 ● Although the sample was representative of the diversity of medical staff in one geographical area of the China, the data  
35  
36 are not nationally representative and ethnic minority groups are particularly under-represented.  
37  
38
- 39 ● The study used a cross-sectional design, which is not well suited to assess the direction of causation.  
40  
41  
42  
43  
44  
45

## 1. Introduction

The impact of psychosocial work conditions on workers' health has been well documented over the past decades. There is accumulating evidence indicted an association between a harsh working environment and a wide range of diseases including mental disorders [1-2], diabetes [3] and cardiovascular disease [4-6] among workers. Exposure to workplace psychosocial risk factors varies according to the types of occupation and job role. Teachers, firefighters and hospital workers have been reported to experience higher level of work-related stress than average level [7-8].

Due to demographic changes, the number of old people and the incidence of chronic diseases are rising in China. Meanwhile, dealing with chronic diseases, incurable or dying patients are emotionally demanding [9]. In addition, there are rapid enhancements on treatment options and therapeutic strategies due to medical advances. These changes may lead to an increased workload and high quantitative demands for Chinese medical staff at hospital. Recent studies have been demonstrated that the prevalence of burnout and stress is relatively high among medical staff [10-11]. Stress fatigue and burnout further have a detrimental influence on the physicians' quality of life and may result in early retirement or reduced quality of patient care and negatively affects health-care systems [12-13]. What is more, studies have shown that medical staff is at increased risk for ill-health, including musculoskeletal disorders [14] and mental health problems [15], caused by adverse workplace factors. Consequently, we need to pay attention to the psychosocial work characteristics of medical staff.

Since the ancient time, traditional Chinese medicine has been identifying a physical status between health and disease which we coined as suboptimal health status (SHS) [16]. SHS is characterized by functional somatic syndromes or symptoms that are medically undiagnosed. Nowadays, much attention has been paid on perceived poor health "somatization" and "medically unexplained symptoms" in community and primary care system located in developed counties [17-18]. Undoubtedly, SHS is becoming a global issue. Recent studies ever reported that 60% of students [19] and 50-60% of occupational population [20-21] suffered from suboptimal health in China. Unfortunately, impaired quality of life, frequent hospital visits and incurrence of significant medical expenses were often accompanied with SHS [22]. Our previous studies have showed that SHS may contribute to the progression or development of chronic diseases, such as cardiovascular disease [23]. Although the aforementioned study has demonstrated the prevalence of SHS and its consequences, few studies that have addressed the issue of psychosocial work stress

1 and suboptimal health among medical staff in China. This study aimed to evaluate the impact of psychosocial work stress on  
2  
3 suboptimal health status and their associations.  
4  
5  
6

## 7 **2. Participants and Methods**

### 10 **2.1 Ethics Statement**

11  
12 Approval was obtained from the Research Ethics Committee of Capital Medical University prior to the initiation of this project.  
13  
14

15 All study participants provided written informed consent prior to enrollment in the study.  
16  
17

### 19 **2.2 Participants**

20  
21 This cross-sectional study was conducted by clustered sampling method. The current analysis included 914 medical staff from  
22  
23 Xuanwu Hospital who participated in the 2014 annual health medical examination (including physicians, nurses, medical  
24  
25 technicians, management staff, et al.). All participants of this study were older than 40 years of age. The data were collected  
26  
27 through questionnaires of Suboptimal Health Status Questionnaires-25 (SHSQ-25) and Copenhagen Psychosocial Questionnaire  
28  
29 (COPSOQ). The subjects were divided into 'SHS' and 'non-SHS' group by the score of SHSQ-25.  
30  
31  
32  
33  
34  
35

### 36 **2.3 Instruments**

#### 39 **2.3.1 Copenhagen Psychosocial Questionnaire**

40  
41 The Copenhagen Psychosocial Questionnaire (COPSOQ) is a comprehensive instrument for the assessment of psychosocial  
42  
43 factors at work, which has been developed and validated by Kristensen and Borg of the Danish National Institute for Occupational  
44  
45 Health in Copenhagen [24]. The Chinese translation and adaptation of COPSOQ had been tested in the population with different  
46  
47 professions, which had been shown to have good reliability and validity, with Cronbach's alpha coefficients of 0.7 for most scales  
48  
49 [25-26]. This instrument includes three versions: a long version for research use, a medium-length version to be used by work  
50  
51 environment professionals, and a short version for workplaces. Our study was based on the short Chinese version of COPSOQ,  
52  
53 which consists of 44 questions forming 8 scales. We selected 34 questions including 5 psychosocial work characteristics related  
54  
55 dimensions from a short version of COPSOQ with namely 'Demands at work', 'Influence and development', 'Interpersonal  
56  
57  
58  
59  
60

1 relations and leadership', 'Insecurity at work' and 'Job satisfaction' [24]. In this survey, the remaining three health-related  
2  
3 dimensions, including 'general health', 'mental health' and 'vitality', in the original short version of COPSOQ were not used. All  
4  
5 items of COPSOQ were transformed on a value range from 0 to 100 points with 0 representing the lowest degree of the measured  
6  
7 psychosocial factor 'strongly disagree', and 100 representing the highest 'strongly agree'. In most scales, a high score was  
8  
9 considered desirable. On the contrary, a low score was considered desirable for 'Demands at work' and 'Insecurity at work'.  
10  
11

12  
13 As a default generic method, the average scores for each dimension of COPSOQ were calculated and compared. But this method  
14  
15 ignored the relationship between each item and corresponding dimension. To explore the association among each dimension of  
16  
17 COPSOQ, we conducted confirmative factor analysis (CFA) [27] which could estimate the relationship between each latent  
18  
19 variable (i.e. each dimension of COPSOQ) and between observed variables (i.e. items of dimensions) and corresponding latent  
20  
21 variable as well.  
22  
23  
24  
25

### 26 **2.3.2 Suboptimal Health Status Questionnaires-25**

27  
28  
29 Suboptimal Health Status (SHS) was measured by the suboptimal health status questionnaire (SHSQ-25) [16] including 25 items  
30  
31 and encompassed five subscales: fatigue, the cardiovascular system, the digestive tract, the immune system and mental status. The  
32  
33 SHSQ-25 is short and easy to be completed, and therefore, suitable for use in general population and primary care service [21].  
34  
35 Each individual was asked to rate a specific statement on a 5-point Likert-type scale based on how often they suffered various  
36  
37 specific complaints in the preceding 3 months: never or almost never, occasionally, often, very often, and always. The scores on  
38  
39 the questionnaire were coded as 0 to 4. SHS scores ranged from 0 to 100 were calculated for each respondent by summing the  
40  
41 ratings for the 25 items. A high score represents a high level of SHS) (poor health).  
42  
43  
44  
45  
46

47  
48 There are no cut-off scores. The sample did not have high levels of suboptimal health (online supplementary table S1); therefore,  
49  
50 for an easier interpretation, participants with a SHSQ-25 score higher than 31 (median of the total sample) were classified as  
51  
52 'SHS', and those equal or lower than 31 were classified as 'non-SHS'. The sensitivity of our results to this choice was examined  
53  
54 further in sensitivity analyses by classifying the respondents with SHSQ-25 scores in the 75th percentile (P75) and above (a score  
55  
56 higher than 43) and in the 90th percentile (P90) and above (a score of 53 and above) as SHS and all others as non-SHS.  
57  
58  
59  
60



## 2.4 Statistical analysis

Descriptive statistics were used to describe the overall population. Univariate analyses were used to compare variations in demographic characteristics among medical staff with different suboptimal health status; for Binary and categorical variable, chi-square test was used, ordinal variable was analyzed by Kolmogorov-Smirnov Z test. For nonparametric data, Mann-Whitney U test was used to assess psychosocial work stress among medical staff with different health status. Demographic missing data were coded as missing and excluded from relevant analysis. A Cronbach's alpha of >0.70 is considered to be an acceptable reliability coefficient for determining the internal consistency of the scale [28]. Model testing was conducted by confirmatory factor analysis (CFA) and structural equation modeling (SEM) analyses. To assess global fit of the model by total sample, we calculated five goodness-of-fit indices. They were  $\chi^2$  and its subsequent ratio with degrees of freedom ( $\chi^2/df$ ), adjusted goodness-of-fit index (AGFI), comparative fit index (CFI), standard root mean square residual (SRMR) and root mean square error of approximation (RMSEA). Evaluation standards were described in previous literature [29-30]. The first-order factor model was used to analyze the correlation among the five dimensions of COPSOQ. And, the second-order factor model was to establish the evaluating method of COPSOQ for comparing psychosocial work characteristics among medical staff. A multivariate logistic regression model was used to estimate the relationship between suboptimal health status and psychosocial work stress. Potential confounders including age, gender, education level, occupation, physical exercise, drinking behavior, and smoking status were adjusted. The two-tailed  $p < 0.05$  was considered to be statistically significant. The statistical packages SPSS 22.0 (Chicago, Illinois) and AMOS 22.0 (Chicago, Illinois) were used for statistical analysis.

## 3. Results

### 3.1 Baseline Characteristics

Among 914 of the medical staff participated in 2014 annual health medical examination 797 eligible questionnaires were retrieved, with the retrieval rate of 87.20%. Table 1 showed the descriptive analyses of participants according to suboptimal health status. The mean age was approximately 50, More than half of the participants were female (n=554, 69.51%). There were 396 (49.7%) individuals considered as SHS based on the score of SHSQ-25 (median). Among which, 80.6 % was female, nearly half with the

1 highest record of formal schooling was junior college, 31.8 % careered in nursing, 59.8 % was without the habit of physical  
2  
3 exercise and mostly didn't smoking and drinking. The score of SHSQ-25 was significantly different among medical stuff with  
4  
5 different age, gender, education level and occupations. Additionally, physical exercise, smoking and drinking also significantly  
6  
7 influenced the status of health. In sensitivity analyses of participant according suboptimal health status (P75 and P90) reported the  
8  
9 similar results (online supplementary table S2).  
10  
11

### 12 **3.2 Reliability**

13  
14 The COPSOQ showed a very high overall internal consistency with Cronbach's alpha of 0.849 for the total scale (Items 1-34). The  
15  
16 internal consistency characteristics of COPSOQ showed good reliability. The Cronbach's alpha about five dimensions were among  
17  
18 0.791 to 0.891 (online supplementary table S3).  
19  
20  
21  
22  
23

### 24 **3.3 Confirmatory factor analysis**

25  
26 We performed confirmatory factor analysis (CFA) based on the five theoretical dimensions of COPSOQ. Parameters were  
27  
28 estimated for the CFA model based on the maximum likelihood procedure involving fitting the variances and covariances among  
29  
30 observed scores. AMOS therefore created a covariance matrix, including the variances and covariances among observed scores.  
31  
32 The next step was to illustrate the observed (items) and unobserved (factors) in the hypothesized model (see online supplementary  
33  
34 figure S1). The observed variables, unobserved variables and measurement error were represented as rectangles, ellipses and  
35  
36 circles respectively. The structural model consisted of five interrelated constructs, including F1 refers to Demands at work; F2,  
37  
38 Influence and development; F3, Interpersonal relations and leadership; F4, Insecurity at work; F5, Job satisfaction. The arrow  
39  
40 between the unobserved variable and the observed variable represented a regression path and its number represented the  
41  
42 standardized regression weight. The arrow between a small circle and the observed variable represented a measurement error term.  
43  
44 The double-headed arrows represented the correlation between two unobserved variables (factor covariances) of the model [31].  
45  
46  
47  
48  
49  
50  
51  
52  
53  
54  
55  
56  
57  
58  
59  
60  
The goodness of fit index was unacceptable in M1a (table 2). After modification, the modified first-order factor model (see online  
supplementary figure S2) for COPSOQ (M1b) had adequate fit of the model to the data (table 2).

However, pearson correlations between first-order factors in M1b model showed that most of the first order factors correlated with

each other (online supplementary table S2). These results supported the notion that the COPSOQ was comprised of five factors subsumed under one or two higher order factors. Based on the theoretical model of COPSOQ, high scores of F1 (Demands at work) and F4 (Insecurity at work) means susceptible to work strain. Conversely, high scores of F2, F3 and F5 may protect people from work strain [25]. According to the theory, the second-order factor model of COPSOQ might be exited. We next conducted CFA to formally test the fit of our hypothesized, second-order factor model (M2a) of COPSOQ. This model, depicted in online supplementary figure S3, didn't have good overall model fit (table 2). This suggested M2a need further modification. M2a was modified in accordance with modification index (Figure 1) and the fit of the modified second-order model (M2b) was acceptable (table 2). The first-order and second-order standardized factor coefficients of this model, displayed in see online supplementary table S4 and S5, were significant, except in the cases where unstandardized coefficients were initially constrained to 1 to scale the latent variables.

We compared modified second-order factor model (M2b) to modified factor first-order model (M1b). The overall fit of this two model were similar. Furthermore, performing a  $\chi^2$  difference test revealed that modified second-order factor model was significantly better than modified factor first-order model ( $\Delta\chi^2=34.73$ ,  $P<0.05$ ), which suggested that the more parsimonious, modified second-factor model would be favored for COPSOQ.

### 3.4 The assessment of psychosocial work strain among medical staff with different work characteristics

We used the two second-order factors (D1 negative psychosocial work factor and D2 positive psychosocial work factor) to assess the psychosocial work stress among medical staff. The factors score was calculated by standardized regression coefficients. In structural equation modeling, the standardized regression coefficients, also called standardized factor loadings, actually are the correlation coefficients between indicators and its latent variables. The form of standardized factor scores of the  $i$ th factor in first-order model is:

$$ZFi = \sum_j b_{ij} (ZC_j - \overline{ZC_j})$$

Where  $b_{ij}$  are standardized regression weights,  $ZC_j$  is the standardized scores of the  $j$ th questionnaire item,  $\overline{ZC_j}$  is average standardized scores.  $i = 1,2,3,4,5$ ,  $j = 1,2,3,4,5,6,7,8,9,10$ ;

1 The form of standardized factor scores of the  $i$ th factor in first-order model is:

$$S = \sum W_i (ZF_i - \overline{ZF}_i)$$

2  
3  
4  
5  
6  
7 Where  $W_i$  are standardized regression weights,  $ZF_i$  is the standardized scores of the  $i$ th latent variable,  $\overline{ZF}_i$  is average  
8  
9  
10 standardized scores of 5 latent variable.  $i = 1,2,3,4,5$ .

11  
12 Based on the above 2 formulas, we can get the score of D1 (negative psychosocial work factor) and D2 (positive psychosocial  
13  
14 work factor) among medical staff. The two factors score did not meet the normal distribution assumptions, were conducted using  
15  
16 the Mann-Whitney U non-parametric test by ranks. The significant difference existed both in negative and positive psychosocial  
17  
18 work strain among medical staff with different age, occupation, physical exercise (table 1). According to the result showed in  
19  
20 table 3, the scores of negative and positive psychosocial work factor were significantly different between SHS and non-SHS group,  
21  
22 and the individuals with SHS were likely to get higher score of negative psychosocial work factor (higher lever of negative  
23  
24 psychosocial work stress) and lower score of positive psychosocial work factor (lower lever of negative psychosocial work stress),  
25  
26 respectively. This difference remained statistically significant when using SHS cut-offs of either P75 or P90  
27  
28  
29  
30  
31  
32

### 33 **3.5 The relationship between psychosocial work stress and suboptimal health (P50, P75 and P90)**

34  
35  
36 Multivariate stepwise logistic regression models showed a statistically significant inverse relationship between positive  
37  
38 psychosocial work stress and suboptimal health, and a positive relationship between negative psychosocial work stress and  
39  
40 suboptimal health. Regarding negative psychosocial work stress in the total sample, those who got higher score of negative  
41  
42 psychosocial work factor had higher risk of being suboptimal than low-score individuals (model1: OR (95% CI)=1.47 (1.34 to  
43  
44 1.62),  $p < 0.001$ ). This relationship remained statistically significant in the adjusted models (model2: OR (95% CI)=1.50 (1.36 to  
45  
46 1.66),  $p < 0.001$ ; model3: OR (95% CI)=1.57 (1.42 to 1.75),  $p < 0.01$ ) (table 4) and when using SHS cut-offs of either P75 or P90.  
47  
48  
49  
50 Considering the total sample, individuals with higher score of positive psychosocial work factor had a lower risk of being  
51  
52 suboptimal health compared with those who got lower score (model1: OR (95% CI) = 0.96 (0.94 to 0.98),  $p < 0.001$ ). This  
53  
54 relationship remained statistically significant in the adjusted models (model2: OR (95% CI) = 0.97 (0.95 to 0.99),  $p = 0.003$ ;  
55  
56 model3: OR (95% CI) = 0.97 (0.95 to 0.99),  $p = 0.012$ ) and in the majority of SHS sensitivity analyses (using cut-offs of P75 and  
57  
58  
59  
60

1 P90), with the exception of the first-step adjusted and fully adjusted models using P90 as a SHS cut-off (model2: OR (95% CI) =  
2  
3 0.97 (0.94 to 1.01), p=0.155; model2: OR (95% CI) = 0.98 (0.95 to 1.02), p=0.325).  
4  
5

#### 6 **4. Discussion**

7

8  
9 As the development of social economy and the rapid pace of life, public have paid more and more attention to the importance of  
10 suboptimal health. SHS is regarded as a subclinical, reversible stage of chronic disease, which is characterized by a decline in  
11 vitality, in physiological function and in the capacity for adaptation within a period of three months [16]. For measurement of SHS,  
12 we developed SHSQ-25 and adopted it as an instrument in this study. SHSQ-25 has good internal consistency, which  
13 item-subscale correlations ranged from 0.51 to 0.72, with Cronbach's  $\alpha$  of 0.70 or higher for all subscales [21]. The good internal  
14 consistency (cronbach's  $\alpha$  of 0.943) was also verified in our study (not shown in our study).  
15  
16

17 Multiple factors which were influential to SHS, including gender, age, physical activities, dietary habits, emotional problems,  
18 social adaptation, etc. have been found in recent studies [20, 23]. In corresponded, age, gender, education level, job, physical  
19 exercise, smoking and drinking were significant factors that may influence the status of health among medical staff in current  
20 study. There was no internationally accepted cutoff value to diagnose SHS. Thus, we further conducted a sensitivity analysis in  
21 which the results also valid. Overall, the female nurses without the ways to relieve stress, such as habit of physical exercise,  
22 smoke and drink, were higher score of SHSQ-25 (poorer health).  
23  
24

25 Over the last 20 years, rare longitudinal and many cross-sectional studies have highlighted work organization conditions,  
26 including repetitive work [32], decision authority [33], physical and emotional demands [34], irregular schedules and long hours  
27 [35-36] and job insecurity [37] were the work factors to explain the emergence or aggravation of mental illness. The relevance of  
28 mental work load and health status based on documented measuring instruments which covered all important aspects was  
29 undisputedly increased. For enterprises and organizations, the COPSOQ questionnaire is a qualified screening-instrument for  
30 psychosocial factors at work [38]. It has good internal consistency with Cronbach's  $\alpha$  of 0.79 or higher for all subscales in our  
31 study. But scale scores were computed as the average of the values of the single aspects, this method ignored the relationship  
32 among each dimension. Previous studies [27] also showed the factor loadings calculated by traditional factor analysis were less  
33  
34  
35  
36  
37  
38  
39  
40  
41  
42  
43  
44  
45  
46  
47  
48  
49  
50  
51  
52  
53  
54  
55  
56  
57  
58  
59  
60

1 accurate and precise than that calculated by structural equation modeling, due to the traditional method could not control the  
2 effects of other variables and caused message loss when extracting common factors. By contrast, structural equation modeling  
3 could get factor loadings both of indicators to first-order factors and first-order factors to second-order factors. The standardized  
4 regression coefficients, also called standardized factor loadings, estimated the relational degree between indicators and first-order  
5 factors, first-order factors and second-order factors under controlling other variables. The other difference with traditional method  
6 is that structural equation modeling allows measurement error of indicators.  
7  
8  
9  
10  
11  
12  
13  
14

15  
16 Based on the above comparison and consideration, we conducted first- and second-order factor model to explore the association  
17 among dimensions of COPSOQ. The analyses presented in this article show that the five scales of the short version of COPSOQ  
18 had good internal reliability. In this study, a modified second-factor model with better fit indexes was considered to be favored for  
19 COPSOQ. Therefore, the psychosocial work stress of medical staff was assessment by modified second-order factor model (M2b).  
20 In M2b, the relationship between F4 insecurity at work and D1 negative psychosocial work factor was not significant ( $p>0.05$ ).  
21 Thus, demand at work was the largest contributor to the negative psychosocial work factor in current study. This result reflected  
22 subjects' job was stable in our study and was accorded with the actual investigation which subjects were on-the-job medical staff  
23 (older than 40 years of age) who faced the risk of unemployment was very low, but high pressure during the inservice, so they are  
24 high risk groups of SHS. While, positive psychosocial work factor was composed by Influence and development, Interpersonal  
25 relations and leadership and Job satisfaction.  
26  
27  
28  
29  
30  
31  
32  
33  
34  
35  
36  
37  
38  
39  
40  
41

42 The clinician as a kind of special population, they need possess highly concentrated attention, sensible thinking, exquisite  
43 techniques and experiences. Moreover, lasting work and intensive labor intensity make them suffer more stress than other medical  
44 specialties. Previous research suggested that individuals with higher levels of education report greater psychological demands [39].  
45 Meanwhile, psychosocial stress also may result from gendered processes [40], such as uneven family responsibilities,  
46 gender-specific harassment or discrimination, and unequal levels of poverty which mainly limited the professional influence and  
47 development of female. Additionally, age was also a significant factor affecting the stress levels [41-42]. Similarly, we found  
48 younger clinical doctors with graduate degree or above who were lack of exercise, on night shift, and longer man-hour (longer  
49 than 40 hour per week) reported higher score of negative psychosocial work factor (higher level of psychosocial work strain).  
50  
51  
52  
53  
54  
55  
56  
57  
58  
59  
60

1 While, older male nonclinical medical staff with habit of physical exercise, smoking and drinking reported higher score of positive  
2  
3 psychosocial work factors (lower level of psychosocial work strain). In our study, psychosocial work stress, especially the  
4  
5 negative side, was the mentioned factor influencing the risk of suboptimal health among medical staff. This relationship was also  
6  
7 found in population of executive employees [43].  
8  
9

10  
11 The results of this study provided some important insights for supervisors and managers in hospital. Positive effects of work in the  
12  
13 medical services should be maximized. And the consequences of the necessary choices and risks such as work-related negative  
14  
15 stress, demands and insecurity at work, in this important profession, should be prevented. Moreover, Yan YX, et al [23] indicated  
16  
17 that SHS is associated with cardiovascular risk factors and contributes to the development of cardiovascular disease. Therefore,  
18  
19 it's less likely to be a question that the above measures are effective to prevent SHS, and further reduce the risks of cardiovascular  
20  
21 disease.  
22  
23  
24  
25

## 26 27 **5. Conclusion**

28  
29  
30 The modified second-order factor model was a suitable method to evaluate COPSOQ among medical staff. In this population, the  
31  
32 negative and positive psychosocial work stress might be the risk and protective factor of suboptimal health, respectively. Negative  
33  
34 psychosocial work stress was the most associated factor to predict suboptimal health.  
35  
36  
37

## 38 **Supplementary Materials**

39  
40  
41 Supplementary Files 1. docx

42  
43  
44 Supplementary Files 2. pdf  
45  
46

## 47 **Acknowledgments**

48  
49  
50 The authors thank the staff at Xuanwu Hospital for their support. They also thank all participants in this study for their voluntary  
51  
52 participation.  
53  
54

## 55 **References**

56  
57  
58  
59 1. Chen SW. Job stress models, depressive disorders and work performance of engineers in microelectronics industry. Int Arch  
60

- 1 Occup Environ Health 2011; 84: 91–103. doi: 10.1007/s00420-010-0538-y
- 2
- 3
- 4 2. Grynderup MB, Mors O, Hansen AM, et al. Work-unit measures of organisational justice and risk of depression: a 2-year
- 5 cohort study. *Occup Environ Med* 2013; 70: 380–385. doi: 10.1136/oemed-2012-101000
- 6
- 7
- 8
- 9 3. Pranita A, Balsubramaniyan B, Phadke AV, et al. Association of occupational & prediabetes statuses with obesity in middle
- 10 aged women. *J Clin Diagn Res* 2013; 7: 1311–1313. doi: 10.7860/JCDR/2013/5466.3134
- 11
- 12
- 13 4. Du CL. Workplace justice and psychosocial work hazards in association with return to work in male workers with coronary
- 14 heart diseases: a prospective study. *Int J Cardiol* 2013; 166: 745–747. doi: 10.1016/j.ijcard.2012.09.176
- 15
- 16
- 17 5. Park J, Kim Y, Cheng Y, et al. A comparison of the recognition of overwork-related cardiovascular disease in Japan, Korea,
- 18 and Taiwan. *Ind Health* 2012; 50:17–23. doi: 10.2486/indhealth.MS1317
- 19
- 20
- 21 6. Belkic KL, Landsbergis PA, Schnall PL, et al. Is job strain a major source of cardiovascular disease risk? A systematic
- 22 review on cohort studies. *Scand J Work Environ Health* 2004; 30: 85–128. doi:10.5271/sjweh.769
- 23
- 24
- 25 7. Tsutsumi A, Kayaba K, Nagami M, et al. The effort-reward imbalance model: experience in Japanese working population. *J*
- 26 *Occup Health* 2002; 44: 398–407. doi: 10.1539/joh.44.398
- 27
- 28
- 29 8. Johnson S, Cooper C, Cartwright S, et al. The experience of work related stress across occupations. *J Manag Psychol* 2005;
- 30 20: 1–2. doi: 10.1108/02683940510579803
- 31
- 32 9. Wallace JE, Lemaire JB, Ghali WA. Physician wellness: A missing quality indicator. *Lancet* 2009; 374: 1714–21. doi:
- 33 10.1016/S0140-6736(09)61424-0
- 34
- 35
- 36 10. Alacacioglu A, Yavuzsen T, Dirioz M, et al. Burnout in nurses and physicians working at an Oncology department.
- 37 *Psychooncology* 2009; 18: 543–8. doi: 10.1002/pon.1432
- 38
- 39
- 40 11. Sehlen S, Vordermark D, Schäfer C, et al. Job stress and job satisfaction of physicians, radiographers, nurses and physicists
- 41 working in radiotherapy: A multicenter analysis by the DEGRO Quality of Life Work Group. *Radiat Oncol* 2009; 4: 6–15.
- 42
- 43
- 44
- 45
- 46
- 47
- 48
- 49
- 50
- 51
- 52
- 53
- 54
- 55
- 56
- 57
- 58
- 59
- 60



- 1 12. Firth-Cozens J, Greenhalgh J. Doctors' perceptions of the links between stress and lowered clinical care. *Soc Sci Med* 1997;  
2 44: 1017–22. doi: 10.1016/S0277-9536(96)00227-4
- 3  
4  
5  
6 13. Fahrenkopf AM, Sectish TC, Barger LK, et al. Rates of medication errors among depressed and burnt out residents:  
7 prospective cohort study. *BMJ* 2008; 336: 488–91. doi: 10.1136/bmj.39469.763218.BE
- 8  
9  
10  
11 14. Alexopoulos EC, Burdorf A, Kalokerinou A. Risk factors for musculoskeletal disorders among nursing personnel in Greek  
12 hospitals. *Int Arch Occup Environ Health* 2003; 76: 289–294. doi: 10.1007/s00420-003-0442-9
- 13  
14  
15  
16  
17 15. Rafnsdottir GL, Gunnarsdottir HK, Tomasson K. Work organization, well-being and health in geriatric care. *Work* 2004; 22:  
18 49–55. PMID: 14757906
- 19  
20  
21  
22  
23 16. Wang W, Russell A, Yan YX. Traditional Chinese medicine and new concepts of predictive, preventive and personalized  
24 medicine in diagnosis and treatment of suboptimal health. *EPMA J.* 2014; 5: 4. doi: 10.1186/1878-5085-5-4
- 25  
26  
27  
28  
29 17. Woolfolk RL, Allen LA. *Treating somatization: a cognitive-behavioural approach.* New York, NY: Guilford; 2007.
- 30  
31  
32 18. Brown RJ. Introduction to the special issue on medically unexplained symptoms: background and future directions. *Clin*  
33 *Psychol Rev.* 2007; 27(7):769–780. doi: 10.1016/j.cpr.2007.07.003
- 34  
35  
36  
37 19. Bi J, Huang Y, Xiao Y, et al. Association of lifestyle factors and suboptimal health status: a cross sectional study of Chinese  
38 students. *BMJ Open* 2014; 4: e005156. doi: 10.1136/bmjopen-2014-005156
- 39  
40  
41  
42  
43 20. Wu S Xuan Z, Li F, et al. Work-Recreation Balance, Health-Promoting Lifestyles and Suboptimal Health Status in Southern  
44 China: A Cross-Sectional Study. *Int J Environ Res Public Health* 2016; 13: 339-354. doi: 10.3390/ijerph13030339
- 45  
46  
47  
48  
49 21. Yan YX, Liu YQ, Li M, et al. Development and evaluation of a questionnaire for measuring suboptimal health status in urban  
50 Chinese. *J Epidemiol* 2009; 19: 333–341. doi: 10.2188/jea.JE20080086
- 51  
52  
53  
54  
55 22. Joustra M.L., Janssens K.A., Bultmann U., Rosmalen J.G. Functional limitations in functional somatic syndromes and  
56 well-defined medical diseases. Results from the general population cohort LifeLines. *J. Psychosom. Res.* 2015;79:94–99. doi:  
57 10.1016/j.jpsychores.2015.05.004
- 58  
59  
60

- 1  
2  
3  
4  
5  
6  
7  
8  
9  
10  
11  
12  
13  
14  
15  
16  
17  
18  
19  
20  
21  
22  
23  
24  
25  
26  
27  
28  
29  
30  
31  
32  
33  
34  
35  
36  
37  
38  
39  
40  
41  
42  
43  
44  
45  
46  
47  
48  
49  
50  
51  
52  
53  
54  
55  
56  
57  
58  
59  
60
23. Yan YX, Do J, Liu YQ, et al. Association of suboptimal health status and cardiovascular risk factors in urban Chinese workers. *J Urban Health* 2012; 89: 329–338. doi: 10.1007/s11524-011-9636-8
24. Kristensen TS, Hannerz H, Høgh A, et al. The Copenhagen Psychosocial Questionnaire - a tool for the assessment and improvement of the psychosocial work environment. *Scand J Work Environ Health* 2005, 31: 438-449. doi: 10.5271/sjweh.948
25. Shang L, Liu P, Fan LB, et al. Psychometric Properties of the Chinese Version of Copenhagen Psychosocial Questionnaire. *J Environ Occup Med* 2008; 25: 572-576. doi: 10.1093/humrep/dew315
26. Meng SJ, Yan YX, Liu YQ, et al. Reliability and validity of Copenhagen Psychosocial Questionnaire of Chinese [article in China]. *Chin Prev Med* 2013; 14:12-15.
27. Babyak M, Green S. Confirmatory factor analysis: An introduction for psychometric medicine researchers. *Psychosomatic Medicine* 2010; 72: 587-597. doi: 10.1097/PSY.0b013e3181de3f8a
28. Nunnally JC, Bernstein IH. *Psychometric theory*, 3rd Ed. McGraw-Hill, New York, London, 1994; pp.701.
29. Kline RB. Measurement models and confirmatory factor analysis. In *Principles and practice of structural equation modeling*, 3rd Ed. The Guilford Press: New York, London, 2005; pp. 230-51.
30. Hu LT, Bentler PM. Cutoff criteria for fit indexes in covariance structure analysis: conventional criteria versus new alternatives. *Structural Equation Modeling* 1999; 6: 1-55. doi: 10.1080/10705519909540118
31. Tavakol S, Dennick R, Tavakol M. Psychometric properties and confirmatory factor analysis of the Jefferson Scale of Physician Empathy. *BMC Med Educ* 2011; 11: 54-61. doi: 10.1186/1472-6920-11-54
32. Shirom A, Westman M, Melamed S. The effects of pay systems on blue-collar employees' emotional distress: the mediating effects of objective and subjective work monotony. *Human Relations* 1999; 52: 1077-1097. doi: 10.1023/A:1016935708825
33. Stansfeld SA, Fuhrer R, Shipley MJ, Marmot MG. Work characteristics predict psychiatric disorder: prospective results from the Withehall II study. *Occupational and Environmental Medicine* 1999; 56: 302-307. PMID: 10472303

- 1 34. Bultmann U, Kant IJ, Van den Brandt PA, et al. Psychosocial work characteristics as risk factors for the onset of fatigue and  
2  
3 psychological distress: prospective results from the Maastricht Cohort Study. *Psychol Med* 2002; 32: 333-345. PMID:  
4  
5 11871373  
6  
7  
8
- 9 35. Spurgeon A, Harrington JM, Cooper CL. Health and safety problems associated with long working hours: a review of the  
10  
11 current position. *Occupational and Environmental Medicine* 1997; 54: 367-375. PMID: 9245942  
12  
13
- 14 36. P. Bohle, J. Tilley. The impact of night work on psychological well-being *Ergonomics* 1989; 32: 1089-1099. doi:  
15  
16 10.1080/00140138908966876  
17  
18  
19
- 20 37. Virtanen P, Janlert U, Hammarström A. Exposure to temporary employment and job insecurity: a longitudinal study of the  
21  
22 health effects. *Occup Environ Med* 2011; 68: 570-4. doi: 10.1136/oem.2010.054890  
23  
24  
25
- 26 38. Nubling M, Stobel U, Hasselhom M, et al. Measuring psychological stress and strain at work: evaluation of the COPSOQ  
27  
28 Questionnaire in Germany. *GMS Psychosoc Med* 2006; 3: 1-14. PMID: 19742072  
29  
30
- 31 39. Landsbergis P, Grzywacz JG, LaMontage AD. Work Organization, job insecurity, and occupational health disparities. *Am J*  
32  
33 *Ind Med* 2014; 57: 495-515. doi: 10.1002/ajim.22126  
34  
35  
36
- 37 40. Springer KW, Mager Stellman J, Jordan-Young RM. Beyond a catalogue of differences: a theoretical frame and good  
38  
39 practice guidelines for researching sex/gender in human health. *Soc Sci Med* 2012; 74: 1817-1824. doi: 10.1016/j.  
40  
41 socscimed.2011.05.033  
42  
43  
44
- 45 41. Choi ES, Ha Y. Work-related stress and risk factors among Korean employees. *J Korean Acad Nurs* 2009; 39: 549-61. doi:  
46  
47 10.4040/jkan.2009.39.4.549  
48  
49  
50
- 51 42. Purcell SR, Kutash M, Cobb S. The relationship between nurses' stress and nurse staffing factors in a hospital setting. *J Nurs*  
52  
53 *Manag* 2011; 19: 714-20. doi: 10.1111/j.1365-2834.2011.01262.x  
54  
55
- 56 43. Hsu SH, Chen DR, Cheng Y, et al. Association of Psychosocial Work Hazards with Depression and Suboptimal Health in  
57  
58 Executive Employees. *JOEM* 2016; 58:728-736. doi: 10.1097/JOM.0000000000000760  
59  
60

**Footnotes**

Yingzhi Liang and Shijiao Meng contributed equally to this work.

**Contributors**

Yuxiang Yan, lead and corresponding author, had full access to the data in the study and takes responsibility for the integrity of the data and the accuracy of the data analysis. Yingzhi Liang wrote the majority of the manuscript, provided critical revisions to the manuscript and aided substantially in the preparation of the revised submission. Shijiao Meng provided input into study design, performed many of the data analysis, made substantial critical revisions and aided with interpretation. Jie Zhang aided with interpretation. All authors read and approved the final manuscript.

**Funding**

This work was supported by the National Science Foundation (81573214), the Beijing Municipal Nature Science Foundation (7162020), the Scientific Research Project of Beijing Municipal Educational Committee (KM201510025006), and the National Key Research and Development Plan (2016YFC0900603).

**Competing interests**

The authors declare that they have no competing interests.

**Ethics approval and consent to participate**

This study and associated protocols were conducted after approval by the Research Ethics Committee of Capital Medical University. All research participants consented to having their anonymous data included in the analyses reported herein.

**Provenance and peer review**

Not commissioned; externally peer reviewed.

**Availability of data and materials**

The datasets used and/or analyzed during this study are available from the corresponding author on reasonable request.

Table 1 Descriptive analyses of participants according to suboptimal health status and of the COPSOQ score as a total sample

| Demographics                | SHSQ-25 (P50)          |            |            | Second-order factor of COPSOQ |                                      |         |                                      |         |
|-----------------------------|------------------------|------------|------------|-------------------------------|--------------------------------------|---------|--------------------------------------|---------|
|                             | Total (N=797)<br>n (%) | Non-SHS    | SHS        | P                             | D1 negative psychosocial work factor | P       | D2 positive psychosocial work factor | P       |
| <b>Age group (years)</b>    |                        |            |            | 0.005*                        |                                      | 0.003   |                                      | 0.007   |
| 40~                         | 270 (33.9)             | 118 (29.4) | 152 (38.4) |                               | 0.21 ± 1.65<br>0.15 (-1.14, 1.32)    |         | -0.80 ± 7.00<br>0.15 (-5.52, 4.17)   |         |
| 45~                         | 245 (30.7)             | 126 (31.4) | 119 (30.1) |                               | 0.07 ± 1.72<br>-0.1 (-1.28, 1.24)    |         | -0.29 ± 6.84<br>0.46 (-4.39, 4.76)   |         |
| 55-68                       | 282 (35.4)             | 157 (39.2) | 125 (31.6) |                               | 0.26 ± 1.70<br>-0.47 (-1.55, 0.88)   |         | 1.01 ± 7.35<br>1.08 (-2.93, 6.78)    |         |
| <b>Gender</b>               |                        |            |            | < 0.001                       |                                      | 0.292   |                                      | < 0.001 |
| Male                        | 243 (30.5)             | 166 (41.4) | 77 (19.4)  |                               | -0.05 ± 1.88<br>-0.17 (-1.67, 1.20)  |         | 1.24 ± 7.29<br>1.54 (-3.33, 6.82)    |         |
| Female                      | 554 (69.5)             | 235 (58.6) | 319 (80.6) |                               | 0.02 ± 1.62<br>-0.11 (-1.22, 1.14)   |         | -0.54 ± 6.96<br>0.24 (-5.02, 4.31)   |         |
| <b>Education level</b>      |                        |            |            | 0.003*                        |                                      | < 0.001 |                                      | 0.111   |
| High school and below       | 122 (15.3)             | 65 (16.20) | 57 (14.4)  |                               | -0.41 ± 1.81<br>-0.62 (-1.90, 0.64)  |         | 0.55 ± 7.79<br>1.19 (-3.74, 6.23)    |         |
| Junior college              | 321 (40.3)             | 130 (32.4) | 191 (48.2) |                               | -0.07 ± 1.65<br>-0.21 (-1.39, 1.04)  |         | -0.78 ± 7.44<br>0.17 (-5.81, 4.35)   |         |
| University                  | 182 (22.8)             | 102 (25.4) | 80 (20.2)  |                               | -0.15 ± 1.71<br>-0.37 (-1.52, 1.01)  |         | 0.62 ± 6.68<br>1.22 (-3.60, 5.47)    |         |
| Graduate students and above | 172 (21.6)             | 104 (25.9) | 68 (17.2)  |                               | 0.57 ± 1.56<br>0.70 (-0.65, 1.63)    |         | 0.42 ± 6.30<br>0.66 (-4.28, 5.17)    |         |
| <b>occupation</b>           |                        |            |            | < 0.001                       |                                      | < 0.001 |                                      | 0.001   |
| Nurses                      | 188 (23.6)             | 62 (15.5)  | 126 (31.8) |                               | 0.22 ± 1.57<br>0.13 (-0.99, 1.16)    |         | -1.15 ± 7.35<br>-0.10 (-7.17, 4.10)  |         |
| Medical technicians         | 187 (23.5)             | 83 (20.7)  | 104 (26.3) |                               | -0.30 ± 1.59<br>-0.43 (-1.64, 1.02)  |         | -0.85 ± 6.75<br>-0.20 (-5.48, 3.46)  |         |
| Doctors                     | 208 (26.1)             | 125 (31.2) | 83 (21.0)  |                               | 0.37 ± 1.72<br>0.31 (-0.93, 1.53)    |         | 0.70 ± 6.97<br>0.94 (-4.19, 6.67)    |         |
| Others                      | 214 (26.9)             | 131 (32.7) | 83 (21.0)  |                               | -0.29 ± 1.78<br>-0.60 (-1.77, 0.89)  |         | 1.06 ± 7.13<br>1.44 (-2.78, 5.51)    |         |
| <b>Physical exercise</b>    |                        |            |            | 0.003                         |                                      | 0.001   |                                      | 0.022   |
| Yes                         | 363 (45.5)             | 204 (50.9) | 159 (40.2) |                               | -0.19 ± 1.76<br>-0.48 (-1.69, 1.14)  |         | 0.51 ± 7.30<br>1.12 (-4.27, 5.77)    |         |
| No                          | 434 (54.5)             | 197 (49.1) | 237 (59.8) |                               | 0.16 ± 1.63<br>0.12 (-1.02, 1.18)    |         | -0.43 ± 6.92<br>0.33 (-5.03, 4.32)   |         |
| <b>Smoking</b>              |                        |            |            | < 0.001                       |                                      | 0.082   |                                      | 0.013   |
| Yes                         | 93 (11.7)              | 63 (15.7)  | 30 (7.6)   |                               | -0.19 ± 2.04<br>-0.90 (-1.77, 1.16)  |         | 1.58 ± 7.80<br>2.16 (-3.16, 7.23)    |         |
| No/Quit                     | 704 (88.3)             | 338 (84.3) | 366 (92.4) |                               | 0.02 ± 1.65<br>-0.09 (-1.28, 1.16)   |         | -0.21 ± 6.99<br>0.47 (-4.72, 4.78)   |         |
| <b>Drinking</b>             |                        |            |            | < 0.001                       |                                      | 0.081   |                                      | 0.012   |
| Yes                         | 166 (20.8)             | 105 (26.2) | 61 (15.4)  |                               | -0.18 ± 1.78<br>-0.66 (-1.56, 1.04)  |         | 1.18 ± 7.13<br>1.39 (-2.83, 6.72)    |         |
| No/Abstained                | 631 (79.2)             | 296 (73.8) | 335 (84.6) |                               | 0.05 ± 1.68<br>-0.84 (-1.30, 1.16)   |         | -0.31 ± 7.07<br>0.37 (-4.93, 4.75)   |         |
| <b>Night shift</b>          |                        |            |            | 0.774                         |                                      | < 0.001 |                                      | 0.445   |
| Yes                         | 331 (41.5)             | 169 (42.1) | 162 (40.9) |                               | 0.27 ± 1.71<br>0.22 (-1.08, 1.36)    |         | -0.21 ± 7.04<br>0.46 (-4.42, 4.78)   |         |
| No                          | 466 (58.5)             | 232 (57.9) | 234 (59.1) |                               | -0.19 ± 1.67<br>-0.39 (-1.53, 0.96)  |         | 0.15 ± 7.16<br>0.67 (-4.68, 5.22)    |         |
| <b>Weekly working hours</b> |                        |            |            | 0.455                         |                                      | < 0.001 |                                      | 0.827   |
| ≤40 hours                   | 270 (33.9)             | 141 (35.2) | 129 (32.6) |                               | -0.49 ± 1.60<br>-0.71 (-1.78, 0.56)  |         | 0.13 ± 6.92<br>0.57 (-4.45, 5.07)    |         |
| >40 hours                   | 527 (66.1)             | 260 (64.8) | 267 (67.4) |                               | 0.25 ± 1.70<br>0.17 (-1.10, 1.43)    |         | -0.06 ± 7.21<br>0.70 (-4.62, 5.11)   |         |

Noted: \* analyzed by Kolmogorov-Smirnov Z test.

**Table 2** Goodness-of-fit indices for the different models

| Model | $\chi^2$ (df) | $\chi^2/df$ | CFI   | AGFI  | SRMR   | RMSEA |
|-------|---------------|-------------|-------|-------|--------|-------|
| M1a   | 4216.39(517)  | 8.16        | 0.737 | 0.708 | 0.0802 | 0.095 |
| M1b   | 1699.40(503)  | 3.40        | 0.915 | 0.864 | 0.0696 | 0.055 |
| M2a   | 4276.30(521)  | 8.21        | 0.733 | 0.707 | 0.0852 | 0.095 |
| M2b   | 1664.67(508)  | 3.28        | 0.918 | 0.866 | 0.0659 | 0.053 |

Noted: A CFI value of greater than 0.90 showed a psychometrically acceptable fit to the data;

The value of AGFI ranged between 0 and 1. A value of 1 indicated a perfect fit;

For the SRMR, values of 0.08 represented good fit;

The value of RMSEA should be below 0.06 to show good fit.

**Table 3.** The psychosocial work stress among different health status

| groups                         | Second-order factor of COPSOQ        |        |                                      |        |
|--------------------------------|--------------------------------------|--------|--------------------------------------|--------|
|                                | D1 negative psychosocial work factor | P      | D2 positive psychosocial work factor | P      |
| suboptimal health status (P50) |                                      | <0.001 |                                      | <0.001 |
| Non-SHS                        | -0.53 ± 1.60                         |        | 1.15 ± 6.97                          |        |
|                                | -0.77 (-1.83, 0.54)                  |        | 1.61 (-2.79, 6.34)                   |        |
| SHS                            | 0.53 ± 1.63                          |        | -1.16 ± 7.06                         |        |
|                                | 0.46 (-0.67, 1.60)                   |        | -0.57 (-5.75, 3.94)                  |        |
| suboptimal health status (P75) |                                      | <0.001 |                                      | <0.001 |
| Non-SHS                        | -0.24 ± 1.67                         |        | 0.71 ± 7.08                          |        |
|                                | -0.39 (-1.62, 0.91)                  |        | 1.24 (-3.85, 5.69)                   |        |
| SHS                            | 0.77 ± 1.57                          |        | -2.29 ± 6.73                         |        |
|                                | 0.70 (-0.44, 1.86)                   |        | -1.93 (-7.11, 2.60)                  |        |
| suboptimal health status (P90) |                                      | <0.001 |                                      | 0.005  |
| Non-SHS                        | -0.09 ± 1.68                         |        | 0.29 ± 7.13                          |        |
|                                | -0.20 (-1.47, 1.08)                  |        | 0.78 (-4.39, 5.22)                   |        |
| SHS                            | 0.90 ± 1.68                          |        | -2.14 ± 6.57                         |        |
|                                | 0.57 (-0.44, 2.19)                   |        | -1.93 (-7.23, 2.18)                  |        |

**Table 4** Sensitivity analyses with multivariate models assessing the relationship between psychosocial work stress and suboptimal health (P50, P75 and P90)

| Model / variables                    | suboptimal health status (P50, P75, P90) |           |        |
|--------------------------------------|------------------------------------------|-----------|--------|
|                                      | OR                                       | OR 95%CI  | P      |
| suboptimal health status (P50)       |                                          |           |        |
| Model1                               |                                          |           |        |
| D1 negative psychosocial work factor | 1.47                                     | 1.34-1.62 | <0.001 |
| D2 positive psychosocial work factor | 0.96                                     | 0.94-0.98 | <0.001 |
| Model2                               |                                          |           |        |
| D1 negative psychosocial work factor | 1.5                                      | 1.36-1.66 | <0.001 |
| D2 positive psychosocial work factor | 0.97                                     | 0.95-0.99 | 0.003  |
| Model3                               |                                          |           |        |
| D1 negative psychosocial work factor | 1.57                                     | 1.42-1.75 | <0.001 |
| D2 positive psychosocial work factor | 0.97                                     | 0.95-0.99 | 0.012  |
| suboptimal health status (P75)       |                                          |           |        |
| Model1                               |                                          |           |        |
| D1 negative psychosocial work factor | 1.39                                     | 1.26-1.54 | <0.001 |
| D2 positive psychosocial work factor | 0.95                                     | 0.93-0.97 | <0.001 |
| Model2                               |                                          |           |        |
| D1 negative psychosocial work factor | 1.42                                     | 1.28-1.58 | <0.001 |
| D2 positive psychosocial work factor | 0.95                                     | 0.93-0.98 | <0.001 |
| Model3                               |                                          |           |        |
| D1 negative psychosocial work factor | 1.44                                     | 1.29-1.61 | <0.001 |
| D2 positive psychosocial work factor | 0.96                                     | 0.93-0.98 | 0.001  |
| suboptimal health status (P90)       |                                          |           |        |
| Model1                               |                                          |           |        |
| D1 negative psychosocial work factor | 1.36                                     | 1.18-1.57 | <0.001 |
| D2 positive psychosocial work factor | 0.97                                     | 0.93-1.00 | 0.037  |
| Model2                               |                                          |           |        |
| D1 negative psychosocial work factor | 1.43                                     | 1.23-1.67 | <0.001 |
| D2 positive psychosocial work factor | 0.97                                     | 0.94-1.01 | 0.155  |
| Model3                               |                                          |           |        |
| D1 negative psychosocial work factor | 1.46                                     | 1.25-1.70 | <0.001 |
| D2 positive psychosocial work factor | 0.98                                     | 0.95-1.02 | 0.325  |

Noted: OR: Odds Ratio. Model1: Unadjusted. Model2: Adjusted by age and gender. Model3: Adjusted by age, gender, education level, occupation, physical exercise, drinking behavior, and smoking status.



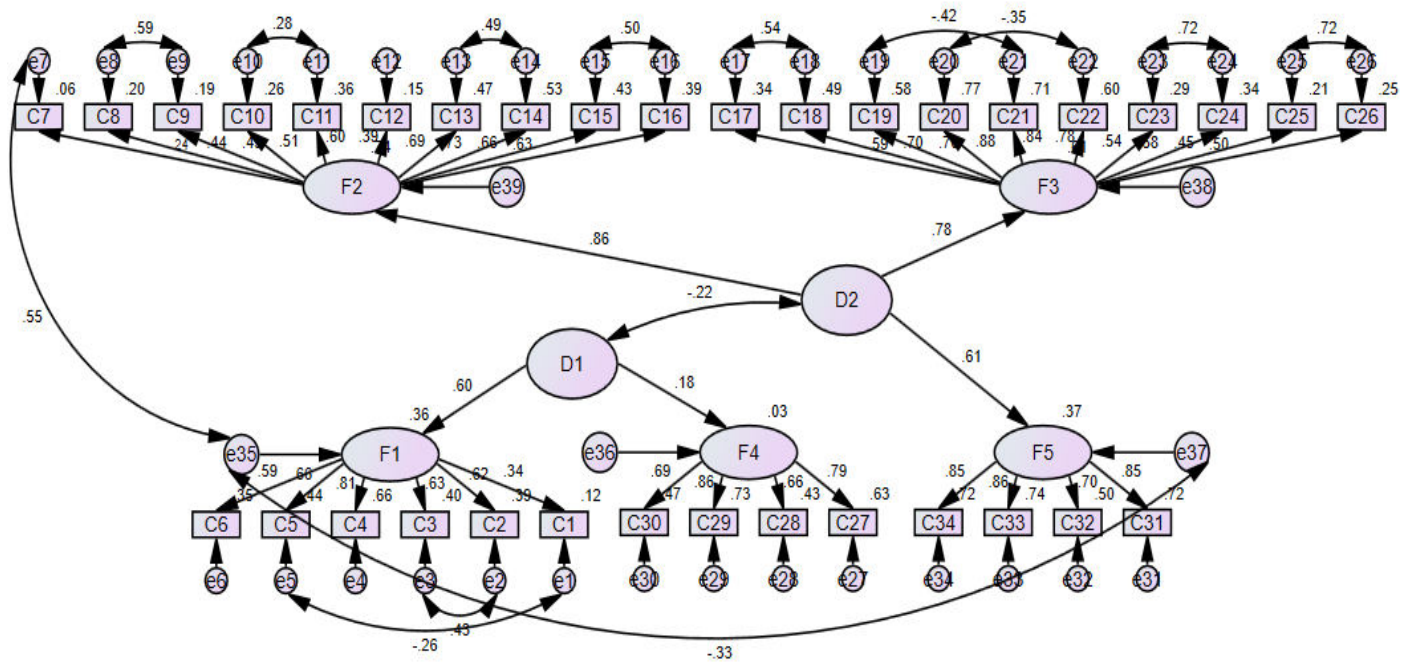

**Figure 1** Standardized coefficients for modified second-order confirmatory factor analysis of COPSOQ (M2b). Confirmatory factor analysis (CFA) results indicated good to adequate model fit:  $\chi^2=1664.67$ ; degrees of freedom (df) =508;  $\chi^2/df =3.28$ ; Comparative Fit Index (CFI) =0.918; Root Mean Square Error of Approximation (RMSEA) =0.053; Standardized Root Mean Square Residual (SRMR) =0.066. Standardized factor loadings and residual terms were shown above with directional arrows. F1 refers to Demands at work; F2, Influence and development; F3, Interpersonal relations and leadership; F4, Insecurity at work; F5, Job satisfaction.

**Table S1.** SHSQ-25 score distribution in survey sample

| SHSQ-25 score | n     | %     | Cumulative % |
|---------------|-------|-------|--------------|
| 0-10          | 52.0  | 6.5   | 6.5          |
| 10-20         | 128.0 | 16.1  | 22.6         |
| 20-30         | 180.0 | 22.6  | 45.2         |
| 30-40         | 182.0 | 22.8  | 68.0         |
| 40-50         | 140.0 | 17.6  | 85.6         |
| 50-60         | 71.0  | 8.9   | 94.5         |
| 60-70         | 32.0  | 4.0   | 98.5         |
| 70-80         | 8.0   | 1.0   | 99.5         |
| 80-90         | 4.0   | 0.5   | 100.0        |
| Total         | 797   | 100.0 |              |

Table S2. Sensitivity analyses of participant according suboptimal health status

| Demographics                | Total<br>(N=797) | SHSQ-25 (P75) |            |        | SHSQ-25 (P90) |           |        |
|-----------------------------|------------------|---------------|------------|--------|---------------|-----------|--------|
|                             | n (%)            | Non-SHS       | SHS        | P      | Non-SHS       | SHS       | P      |
| <b>Age group(years)</b>     |                  |               |            | <0.001 |               |           | 0.005  |
| 40~                         | 270 (33.9)       | 188 (30.9)    | 82 (43.4)  |        | 234 (32.2)    | 36 (50.7) |        |
| 45~                         | 245 (30.7)       | 188 (30.9)    | 57 (30.2)  |        | 228 (31.4)    | 17 (23.9) |        |
| 55~68                       | 282 (35.4)       | 232 (38.2)    | 50 (26.5)  |        | 264 (36.4)    | 18 (25.4) |        |
| <b>Gender</b>               |                  |               |            | <0.001 |               |           | <0.001 |
| Male                        | 243 (30.5)       | 213 (35.0)    | 30 (15.9)  |        | 239 (32.9)    | 4 (5.6)   |        |
| Female                      | 554 (69.5)       | 395 (65.0)    | 159 (84.1) |        | 487 (67.1)    | 67 (94.4) |        |
| <b>Education level</b>      |                  |               |            | 0.004  |               |           | 0.007  |
| High school and below       | 122 (15.3)       | 970 (16.0)    | 25 (13.2)  |        | 109 (15.0)    | 13 (18.3) |        |
| Junior college              | 321 (40.3)       | 225 (37.0)    | 96 (50.8)  |        | 284 (39.1)    | 37 (52.1) |        |
| University                  | 182 (22.8)       | 142 (23.4)    | 40 (21.2)  |        | 167 (23.0)    | 15 (21.1) |        |
| Graduate students and above | 172 (21.6)       | 144 (23.7)    | 28 (14.8)  |        | 166 (22.9)    | 6 (8.5)   |        |
| <b>occupation</b>           |                  |               |            | <0.001 |               |           | <0.001 |
| Nurses                      | 188 (23.6)       | 117 (19.2)    | 71 (37.6)  |        | 151 (20.8)    | 37 (52.1) |        |
| Medical technicians         | 187 (23.5)       | 137 (22.5)    | 50 (26.5)  |        | 168 (23.1)    | 19 (26.8) |        |
| Doctors                     | 208 (26.1)       | 173 (28.5)    | 35 (18.5)  |        | 201 (27.7)    | 7 (9.9)   |        |
| Others                      | 214 (26.9)       | 181 (29.8)    | 33 (17.5)  |        | 206 (28.4)    | 8 (11.3)  |        |
| <b>Physical exercise</b>    |                  |               |            | 0.012  |               |           | 0.045  |
| Yes                         | 363 (45.5)       | 292 (48.0)    | 71 (37.6)  |        | 339 (46.7)    | 24 (33.8) |        |
| No                          | 434 (54.5)       | 316 (52.0)    | 118 (62.4) |        | 387 (53.3)    | 47 (66.2) |        |
| <b>Smoking</b>              |                  |               |            | <0.001 |               |           | 0.002  |
| Yes                         | 93 (11.7)        | 87 (14.3)     | 6 (3.2)    |        | 92 (12.7)     | 1 (1.4)   |        |
| No/Quit                     | 704 (88.3)       | 521 (85.7)    | 183 (96.8) |        | 634 (87.3)    | 70 (98.6) |        |
| <b>Drinking</b>             |                  |               |            | 0.001  |               |           | 0.014  |
| Yes                         | 166 (20.8)       | 142 (23.4)    | 24 (12.7)  |        | 159 (21.9)    | 7 (9.9)   |        |
| No/Abstained                | 631 (79.2)       | 466 (76.6)    | 165 (87.3) |        | 567 (78.1)    | 64 (90.1) |        |
| <b>Night shift</b>          |                  |               |            | 0.8    |               |           | 0.801  |
| Yes                         | 331 (41.5)       | 251 (41.3)    | 80 (42.3)  |        | 303 (41.7)    | 28 (39.4) |        |
| No                          | 466 (58.5)       | 357 (58.7)    | 109 (57.7) |        | 423 (58.3)    | 43 (60.6) |        |
| <b>Weekly working hours</b> |                  |               |            | 0.022  |               |           | 0.067  |
| ≤40 hours                   | 270 (33.9)       | 219 (36.0)    | 51 (27.0)  |        | 253 (34.8)    | 17 (23.9) |        |
| >40 hours                   | 527 (66.1)       | 389 (64.0)    | 138 (73.0) |        | 473 (65.2)    | 54 (76.1) |        |

Noted: \*: P&lt;0.01.

**Table S3.** Test of internal consistency and interfactor correlations of the COPSOQ

| Factor (Cronbach's $\alpha$ )                    | N of Items | F <sub>1</sub> | F <sub>2</sub> | F <sub>3</sub> | F <sub>4</sub> | F <sub>5</sub> |
|--------------------------------------------------|------------|----------------|----------------|----------------|----------------|----------------|
| F <sub>1</sub> Demands (0.791)                   | 6          | 1              | —              | —              | —              | —              |
| F <sub>2</sub> Influence and development (0.820) | 10         | -0.067         | 1              | —              | —              | —              |
| F <sub>3</sub> Relation and leadership (0.891)   | 10         | -0.094 *       | 0.606**        | 1              | —              | —              |
| F <sub>4</sub> Insecurity at work (0.830)        | 4          | 0.037**        | 0.002          | -0.004         | 1              | —              |
| F <sub>5</sub> Job satisfaction (0.881)          | 4          | -0.214**       | 0.306**        | 0.366**        | -0.027**       | 1              |

r correlation \* $p < 0.05$ ; \*\* $p < 0.01$

For peer review only

Table S4 The first-order standardized factor coefficients of model

| path      | First-order Factor Model (M1a) |          |                                      | Modified First-order Factor Model (M1b) |          |                                      |
|-----------|--------------------------------|----------|--------------------------------------|-----------------------------------------|----------|--------------------------------------|
|           | regression coefficients        | <i>P</i> | standardized regression coefficients | regression coefficients                 | <i>P</i> | standardized regression coefficients |
| C1<---F1  | 0.383                          | ***      | 0.331                                | 0.370                                   | ***      | 0.340                                |
| C2<---F1  | 0.947                          | ***      | 0.729                                | 0.765                                   | ***      | 0.628                                |
| C3<---F1  | 0.976                          | ***      | 0.734                                | 0.786                                   | ***      | 0.631                                |
| C4<---F1  | 1.000                          | —        | 0.791                                | 1.000                                   | —        | 0.844                                |
| C5<---F1  | 0.637                          | ***      | 0.623                                | 0.627                                   | ***      | 0.654                                |
| C6<---F1  | 0.815                          | ***      | 0.548                                | 0.825                                   | ***      | 0.591                                |
| C7<---F2  | 0.297                          | ***      | 0.214                                | 0.293                                   | ***      | 0.195                                |
| C8<---F2  | 0.695                          | ***      | 0.425                                | 0.747                                   | ***      | 0.421                                |
| C9<---F2  | 0.697                          | ***      | 0.414                                | 0.758                                   | ***      | 0.415                                |
| C10<---F2 | 0.702                          | ***      | 0.506                                | 0.748                                   | ***      | 0.497                                |
| C11<---F2 | 0.728                          | ***      | 0.581                                | 0.804                                   | ***      | 0.592                                |
| C12<---F2 | 0.502                          | ***      | 0.353                                | 0.579                                   | ***      | 0.376                                |
| C13<---F2 | 1.018                          | ***      | 0.765                                | 1.000                                   | ***      | 0.693                                |
| C15<---F2 | 1.079                          | —        | 0.803                                | 1.000                                   | —        | 0.741                                |
| C14<---F2 | 1.000                          | ***      | 0.695                                | 1.119                                   | ***      | 0.665                                |
| C16<---F2 | 0.99                           | ***      | 0.681                                | 1.003                                   | ***      | 0.638                                |
| C17<---F3 | 0.831                          | ***      | 0.646                                | 0.727                                   | ***      | 0.587                                |
| C18<---F3 | 0.855                          | ***      | 0.753                                | 0.770                                   | ***      | 0.704                                |
| C19<---F3 | 0.689                          | ***      | 0.747                                | 0.678                                   | ***      | 0.763                                |
| C20<---F3 | 1.000                          | —        | 0.843                                | 1.000                                   | —        | 0.875                                |
| C21<---F3 | 0.947                          | ***      | 0.772                                | 0.991                                   | ***      | 0.838                                |
| C22<---F3 | 0.77                           | ***      | 0.727                                | 0.794                                   | ***      | 0.777                                |
| C23<---F3 | 0.482                          | ***      | 0.600                                | 0.424                                   | ***      | 0.547                                |
| C24<---F3 | 0.54                           | ***      | 0.641                                | 0.476                                   | ***      | 0.586                                |
| C25<---F3 | 0.503                          | ***      | 0.496                                | 0.444                                   | ***      | 0.454                                |
| C26<---F3 | 0.568                          | ***      | 0.526                                | 0.504                                   | ***      | 0.488                                |
| C27<---F4 | 0.826                          | ***      | 0.793                                | 0.827                                   | ***      | 0.793                                |
| C28<---F4 | 0.75                           | ***      | 0.658                                | 0.750                                   | ***      | 0.658                                |
| C29<---F4 | 1.000                          | —        | 0.853                                | 1.000                                   | —        | 0.853                                |
| C30<---F4 | 0.853                          | ***      | 0.689                                | 0.854                                   | ***      | 0.690                                |
| C31<---F5 | 1.026                          | ***      | 0.850                                | 1.026                                   | ***      | 0.850                                |
| C32<---F5 | 0.999                          | ***      | 0.702                                | 1.000                                   | ***      | 0.703                                |
| C33<---F5 | 1.000                          | —        | 0.859                                | 1.000                                   | —        | 0.859                                |
| C34<---F5 | 0.929                          | ***      | 0.849                                | 0.928                                   | ***      | 0.848                                |

Noted: \*\*\* means  $P < 0.001$

Table S5 The second-order standardized factor coefficients of model

| path      | Second-order Factor Model (M2a) |          |                                      | Modified First-order Factor Model (M2b) |          |                                      |
|-----------|---------------------------------|----------|--------------------------------------|-----------------------------------------|----------|--------------------------------------|
|           | regression coefficients         | <i>P</i> | standardized regression coefficients | regression coefficients                 | <i>P</i> | standardized regression coefficients |
| F1<---D1  | 1.000                           | —        | 0.831                                | 1.000                                   | —        | 0.600                                |
| F4<---D1  | 0.061                           | 0.506    | 0.144                                | 0.101                                   | 0.355    | 0.177                                |
| F2<---D2  | 1.000                           | —        | 0.827                                | 1.000                                   | —        | 0.859                                |
| F3<---D2  | 1.191                           | ***      | 0.843                                | 1.226                                   | ***      | 0.783                                |
| F5<---D2  | 0.634                           | ***      | 0.612                                | 0.670                                   | ***      | 0.609                                |
| C1<---F1  | 0.382                           | ***      | 0.327                                | 0.392                                   | ***      | 0.343                                |
| C2<---F1  | 0.963                           | ***      | 0.736                                | 0.796                                   | ***      | 0.625                                |
| C3<---F1  | 0.992                           | ***      | 0.740                                | 0.827                                   | ***      | 0.635                                |
| C4<---F1  | 1.000                           | —        | 0.785                                | 1.000                                   | —        | 0.812                                |
| C5<---F1  | 0.641                           | ***      | 0.622                                | 0.663                                   | ***      | 0.662                                |
| C6<---F1  | 0.811                           | ***      | 0.541                                | 0.865                                   | ***      | 0.592                                |
| C7<---F2  | 0.284                           | ***      | 0.205                                | 0.365                                   | ***      | 0.238                                |
| C8<---F2  | 0.686                           | ***      | 0.420                                | 0.799                                   | ***      | 0.443                                |
| C9<---F2  | 0.691                           | ***      | 0.411                                | 0.807                                   | ***      | 0.434                                |
| C10<---F2 | 0.697                           | ***      | 0.503                                | 0.779                                   | ***      | 0.509                                |
| C11<---F2 | 0.725                           | ***      | 0.580                                | 0.829                                   | ***      | 0.600                                |
| C12<---F2 | 0.502                           | ***      | 0.353                                | 0.612                                   | ***      | 0.390                                |
| C13<---F2 | 1.018                           | ***      | 0.766                                | 1.008                                   | ***      | 0.687                                |
| C14<---F2 | 1.000                           | —        | 0.805                                | 1.000                                   | —        | 0.729                                |
| C15<---F2 | 1.080                           | ***      | 0.697                                | 1.124                                   | ***      | 0.657                                |
| C16<---F2 | 0.988                           | ***      | 0.682                                | 1.003                                   | ***      | 0.627                                |
| C17<---F3 | 0.830                           | ***      | 0.645                                | 0.723                                   | ***      | 0.586                                |
| C18<---F3 | 0.855                           | ***      | 0.753                                | 0.764                                   | ***      | 0.702                                |
| C19<---F3 | 0.689                           | ***      | 0.747                                | 0.671                                   | ***      | 0.759                                |
| C20<---F3 | 1.000                           | —        | 0.843                                | 1.000                                   | —        | 0.879                                |
| C21<---F3 | 0.947                           | ***      | 0.771                                | 0.990                                   | ***      | 0.841                                |
| C22<---F3 | 0.770                           | ***      | 0.726                                | 0.790                                   | ***      | 0.777                                |
| C23<---F3 | 0.483                           | ***      | 0.601                                | 0.418                                   | ***      | 0.543                                |
| C24<---F3 | 0.541                           | ***      | 0.641                                | 0.469                                   | ***      | 0.581                                |
| C25<---F3 | 0.504                           | ***      | 0.497                                | 0.442                                   | ***      | 0.455                                |
| C26<---F3 | 0.569                           | ***      | 0.527                                | 0.521                                   | ***      | 0.504                                |
| C27<---F4 | 0.825                           | ***      | 0.793                                | 0.824                                   | ***      | 0.793                                |
| C28<---F4 | 0.746                           | ***      | 0.656                                | 0.745                                   | ***      | 0.655                                |
| C29<---F4 | 1.000                           | —        | 0.855                                | 1.000                                   | —        | 0.856                                |
| C30<---F4 | 0.850                           | ***      | 0.688                                | 0.850                                   | ***      | 0.688                                |
| C31<---F5 | 1.000                           | —        | 0.850                                | 1.000                                   | —        | 0.850                                |
| C32<---F5 | 0.973                           | ***      | 0.702                                | 0.976                                   | ***      | 0.704                                |
| C33<---F5 | 0.975                           | ***      | 0.860                                | 0.974                                   | ***      | 0.859                                |
| C34<---F5 | 0.905                           | ***      | 0.848                                | 0.904                                   | ***      | 0.848                                |

Noted: \*\*\* means  $P < 0.001$

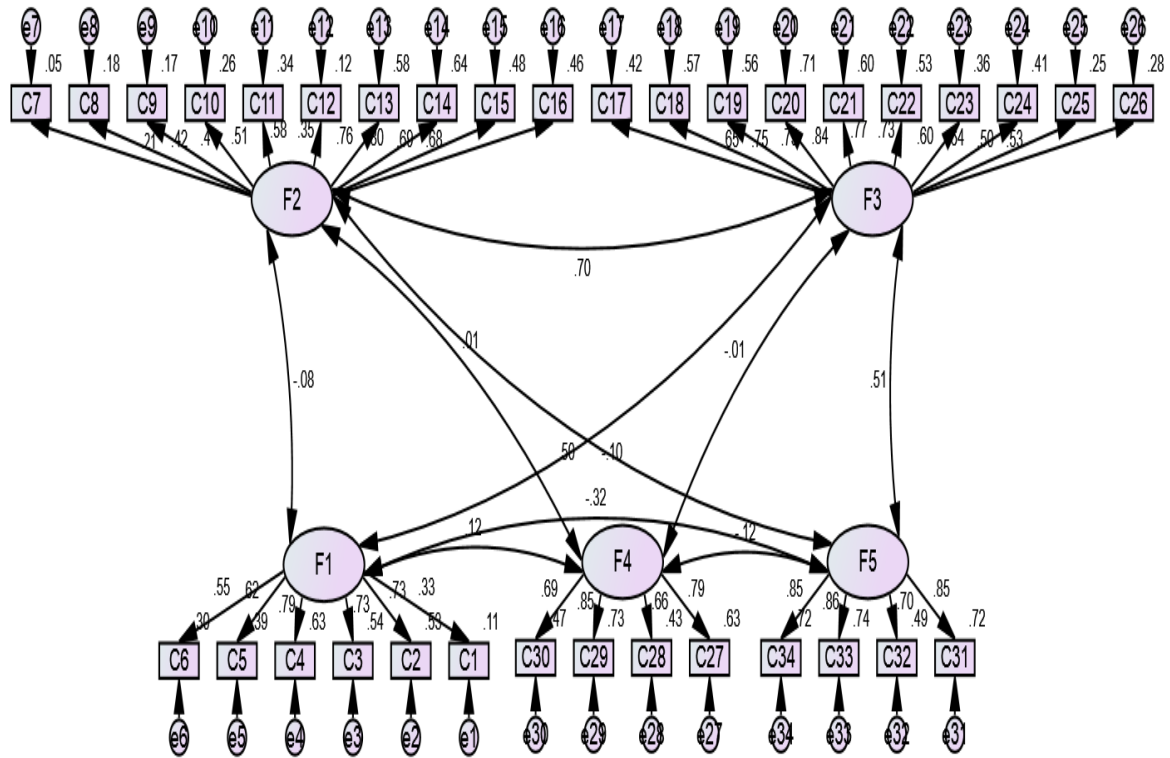

**Figure S1** Standardized coefficients for initial first-order confirmatory factor analysis of COPSOQ (M1a). Confirmatory factor analysis (CFA) results didn't indicate good to adequate model fit:  $\chi^2=4216.39$ ; degrees of freedom ( $df$ ) =517;  $\chi^2/df$  =8.16; Comparative Fit Index (CFI) =0.737; Root Mean Square Error of Approximation (RMSEA) =0.095; Standardized Root Mean Square Residual (SRMR) =0.080. Standardized factor loadings and residual terms were shown above with directional arrows. F1 refers to Demands at work; F2, Influence and development; F3, Interpersonal relations and leadership; F4, Insecurity at work; F5, Job satisfaction.

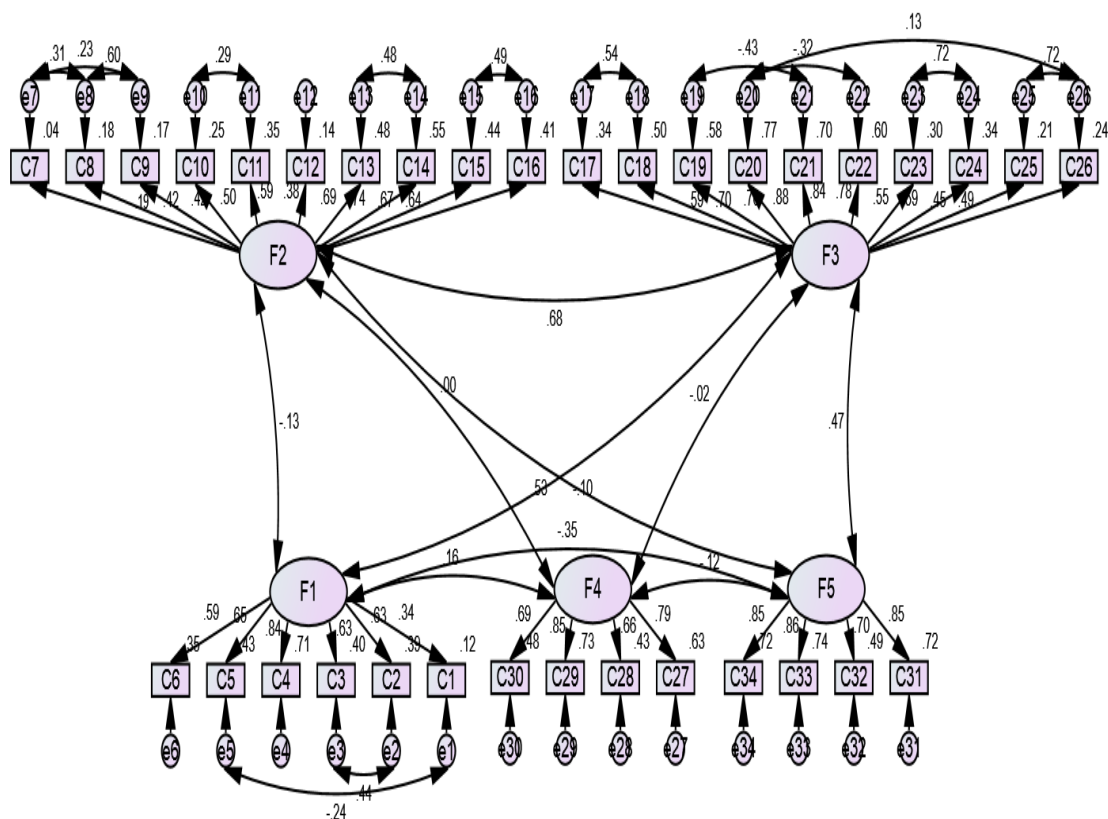

**Figure S2** Standardized coefficients for modified first-order confirmatory factor analysis of COPSOQ (M1b). Confirmatory factor analysis (CFA) results indicated good to adequate model fit:  $\chi^2=1699.40$ ; degrees of freedom (df)=503;  $\chi^2/df=3.40$ ; Comparative Fit Index (CFI)=0.915; Root Mean Square Error of Approximation (RMSEA)=0.055; Standardized Root Mean Square Residual (SRMR)=0.070. Standardized factor loadings and residual terms were shown above with directional arrows. F1 refers to Demands at work; F2, Influence and development; F3, Interpersonal relations and leadership; F4, Insecurity at work; F5, Job satisfaction.



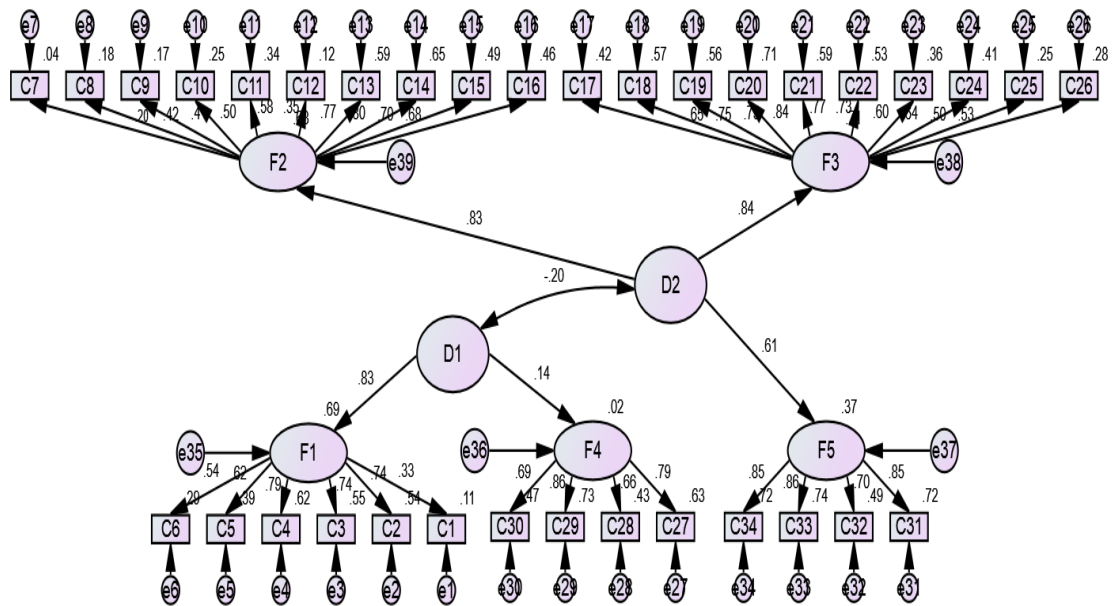

**Figure S3** Standardized coefficients for initial second-order confirmatory factor analysis of COPSOQ (M2a). Confirmatory factor analysis (CFA) results didn't indicate good to adequate model fit:  $\chi^2=4276.30$ ; degrees of freedom ( $df$ ) =521;  $\chi^2/df=8.21$ ; Comparative Fit Index (CFI) =0.733; Root Mean Square Error of Approximation (RMSEA) =0.095; Standardized Root Mean Square Residual (SRMR) =0.085. Standardized factor loadings and residual terms were shown above with directional arrows. F1 refers to Demands at work; F2, Influence and development; F3, Interpersonal relations and leadership; F4, Insecurity at work; F5, Job satisfaction.

STROBE 2007 (v4) Statement—Checklist of items that should be included in reports of *cross-sectional studies*

| Section/Topic                | Item # | Recommendation                                                                                                                                                                       | Reported on page # |
|------------------------------|--------|--------------------------------------------------------------------------------------------------------------------------------------------------------------------------------------|--------------------|
| Title and abstract           | 1      | (a) Indicate the study's design with a commonly used term in the title or the abstract                                                                                               | 2                  |
|                              |        | (b) Provide in the abstract an informative and balanced summary of what was done and what was found                                                                                  | 2                  |
| <b>Introduction</b>          |        |                                                                                                                                                                                      |                    |
| Background/rationale         | 2      | Explain the scientific background and rationale for the investigation being reported                                                                                                 | 4                  |
| Objectives                   | 3      | State specific objectives, including any prespecified hypotheses                                                                                                                     | 5                  |
| <b>Methods</b>               |        |                                                                                                                                                                                      |                    |
| Study design                 | 4      | Present key elements of study design early in the paper                                                                                                                              | 5                  |
| Setting                      | 5      | Describe the setting, locations, and relevant dates, including periods of recruitment, exposure, follow-up, and data collection                                                      | 5, 6               |
| Participants                 | 6      | (a) Give the eligibility criteria, and the sources and methods of selection of participants                                                                                          | 5                  |
| Variables                    | 7      | Clearly define all outcomes, exposures, predictors, potential confounders, and effect modifiers. Give diagnostic criteria, if applicable                                             | 5, 6               |
| Data sources/<br>measurement | 8*     | For each variable of interest, give sources of data and details of methods of assessment (measurement). Describe comparability of assessment methods if there is more than one group | 5, 6               |
| Bias                         | 9      | Describe any efforts to address potential sources of bias                                                                                                                            | 7                  |

|                        |     |                                                                                                                                                                                                              |                                  |
|------------------------|-----|--------------------------------------------------------------------------------------------------------------------------------------------------------------------------------------------------------------|----------------------------------|
| Study size             | 10  | Explain how the study size was arrived at                                                                                                                                                                    | 5                                |
| Quantitative variables | 11  | Explain how quantitative variables were handled in the analyses. If applicable, describe which groupings were chosen and why                                                                                 | 7                                |
| Statistical methods    | 12  | (a) Describe all statistical methods, including those used to control for confounding                                                                                                                        | 7                                |
|                        |     | (b) Describe any methods used to examine subgroups and interactions                                                                                                                                          | 7                                |
|                        |     | (c) Explain how missing data were addressed                                                                                                                                                                  | 7                                |
|                        |     | (d) If applicable, describe analytical methods taking account of sampling strategy                                                                                                                           | N                                |
|                        |     | (e) Describe any sensitivity analyses                                                                                                                                                                        | 7                                |
| <b>Results</b>         |     |                                                                                                                                                                                                              |                                  |
| Participants           | 13* | (a) Report numbers of individuals at each stage of study—eg numbers potentially eligible, examined for eligibility, confirmed eligible, included in the study, completing follow-up, and analysed            | 7, 8                             |
|                        |     | (b) Give reasons for non-participation at each stage                                                                                                                                                         | 7                                |
|                        |     | (c) Consider use of a flow diagram                                                                                                                                                                           | N                                |
| Descriptive data       | 14* | (a) Give characteristics of study participants (eg demographic, clinical, social) and information on exposures and potential confounders                                                                     | Table 1 and 3                    |
|                        |     | (b) Indicate number of participants with missing data for each variable of interest                                                                                                                          | N                                |
| Outcome data           | 15* | Report numbers of outcome events or summary measures                                                                                                                                                         | Online summary table S1, Table 3 |
| Main results           | 16  | (a) Give unadjusted estimates and, if applicable, confounder-adjusted estimates and their precision (eg, 95% confidence interval). Make clear which confounders were adjusted for and why they were included | Page 10 and Table 4              |

|                          |    |                                                                                                                                                                            |                                        |
|--------------------------|----|----------------------------------------------------------------------------------------------------------------------------------------------------------------------------|----------------------------------------|
|                          |    | (b) Report category boundaries when continuous variables were categorized                                                                                                  | 8                                      |
|                          |    | (c) If relevant, consider translating estimates of relative risk into absolute risk for a meaningful time period                                                           | N                                      |
| Other analyses           | 17 | Report other analyses done—eg analyses of subgroups and interactions, and sensitivity analyses                                                                             | 8-10, Table 4, Online summary table S2 |
| <b>Discussion</b>        |    |                                                                                                                                                                            |                                        |
| Key results              | 18 | Summarise key results with reference to study objectives                                                                                                                   | 11                                     |
| Limitations              | 19 | Discuss limitations of the study, taking into account sources of potential bias or imprecision. Discuss both direction and magnitude of any potential bias                 | 3                                      |
| Interpretation           | 20 | Give a cautious overall interpretation of results considering objectives, limitations, multiplicity of analyses, results from similar studies, and other relevant evidence | 11,12                                  |
| Generalisability         | 21 | Discuss the generalisability (external validity) of the study results                                                                                                      | 3                                      |
| <b>Other information</b> |    |                                                                                                                                                                            |                                        |
| Funding                  | 22 | Give the source of funding and the role of the funders for the present study and, if applicable, for the original study on which the present article is based              | 18                                     |

\*Give information separately for cases and controls in case-control studies and, if applicable, for exposed and unexposed groups in cohort and cross-sectional studies.

**Note:** An Explanation and Elaboration article discusses each checklist item and gives methodological background and published examples of transparent reporting. The STROBE checklist is best used in conjunction with this article (freely available on the Web sites of PLoS Medicine at <http://www.plosmedicine.org/>, Annals of Internal Medicine at <http://www.annals.org/>, and Epidemiology at <http://www.epidem.com/>). Information on the STROBE Initiative is available at [www.strobe-statement.org](http://www.strobe-statement.org).

# BMJ Open

## The relationship between stress-related psychosocial work factors and suboptimal health among Chinese medical staff: a cross-sectional study

|                                 |                                                                                                                                                                                                                                                                                                                                                                                                                                                                                                                                                                                                                                                                                                                                                                                                                                                                                 |
|---------------------------------|---------------------------------------------------------------------------------------------------------------------------------------------------------------------------------------------------------------------------------------------------------------------------------------------------------------------------------------------------------------------------------------------------------------------------------------------------------------------------------------------------------------------------------------------------------------------------------------------------------------------------------------------------------------------------------------------------------------------------------------------------------------------------------------------------------------------------------------------------------------------------------|
| Journal:                        | <i>BMJ Open</i>                                                                                                                                                                                                                                                                                                                                                                                                                                                                                                                                                                                                                                                                                                                                                                                                                                                                 |
| Manuscript ID                   | bmjopen-2017-018485.R1                                                                                                                                                                                                                                                                                                                                                                                                                                                                                                                                                                                                                                                                                                                                                                                                                                                          |
| Article Type:                   | Research                                                                                                                                                                                                                                                                                                                                                                                                                                                                                                                                                                                                                                                                                                                                                                                                                                                                        |
| Date Submitted by the Author:   | 27-Sep-2017                                                                                                                                                                                                                                                                                                                                                                                                                                                                                                                                                                                                                                                                                                                                                                                                                                                                     |
| Complete List of Authors:       | Liang, Yingzhi; Capital Medical University, Department of Epidemiology and Biostatistics, School of Public Health; Municipal Key Laboratory of Clinical Epidemiology<br>Meng, Shijiao; Tiantan Hospital, Capital Medical University, Department of Education<br>Zhang, Jie; Capital Medical University, Department of Epidemiology and Biostatistics, School of Public Health; Municipal Key Laboratory of Clinical Epidemiology<br>Wu, Lijuan; Capital Medical University, Department of Epidemiology and Biostatistics, School of Public Health; Municipal Key Laboratory of Clinical Epidemiology<br>Chu, Xi; Xuanwu Hospital, Capital Medical University, Health Management Center<br>Yan, Yuxiang; Capital Medical University, Department of Epidemiology and Biostatistics; Capital Medical University, Municipal Key Laboratory of Clinical Epidemiology, Beijing, China |
| <b>Primary Subject Heading</b>: | Mental health                                                                                                                                                                                                                                                                                                                                                                                                                                                                                                                                                                                                                                                                                                                                                                                                                                                                   |
| Secondary Subject Heading:      | Epidemiology, Occupational and environmental medicine, Research methods                                                                                                                                                                                                                                                                                                                                                                                                                                                                                                                                                                                                                                                                                                                                                                                                         |
| Keywords:                       | Psychosocial Stress, Suboptimal Health, Medical Staff, Confirmative Factor Analysis                                                                                                                                                                                                                                                                                                                                                                                                                                                                                                                                                                                                                                                                                                                                                                                             |
|                                 |                                                                                                                                                                                                                                                                                                                                                                                                                                                                                                                                                                                                                                                                                                                                                                                                                                                                                 |

SCHOLARONE™  
Manuscripts

# The relationship between stress-related psychosocial work factors and suboptimal health among Chinese medical staff: a cross-sectional study

Yingzhi Liang<sup>1,2,†</sup>, Shijiao Meng<sup>3,†</sup>, Jie Zhang<sup>1,2</sup>, Lijuan Wu<sup>1,2</sup>, Xi Chu<sup>4</sup>, and Yuxiang Yan<sup>1,2</sup>

<sup>1</sup> Department of Epidemiology and Biostatistics, School of Public Health, Capital Medical University, Beijing, China

<sup>2</sup> Municipal Key Laboratory of Clinical Epidemiology, Beijing, China

<sup>3</sup> Department of Education, Tiantan Hospital, Capital Medical University, Beijing, China

<sup>4</sup> Health Management Center, Xuanwu Hospital, Capital Medical University, Beijing, China

† These two authors contributed equally to the article.

## Correspondence to

1. correspondence author: Professor Yuxiang Yan, Dept. of Epidemiology and Biostatistics, School of Public Health, Capital Medical University, No. 10 Xitoutiao, You An Men, Beijing 100069, China;

[yanyxepi@ccmu.edu.cn](mailto:yanyxepi@ccmu.edu.cn)

2. co-corresponding author: Professor Xi Chu, Physical Examination Center, Xuanwu Hospital, Capital Medical University, Beijing, China; [cissy9007@163.com](mailto:cissy9007@163.com)

1     **Abstract**

2  
3  
4     **Objectives** To develop and validate a model to measure psychosocial factors at work among medical staff in China based on  
5  
6     3     confirmatory factor analysis. The second aim of the current study was to clarify the association between stress-related  
7  
8     4     psychosocial work factors and suboptimal health status.

9  
10  
11     5     **Design** The cross-sectional study was conducted by clustered sampling method.

12  
13  
14     6     **Setting** Xuanwu Hospital, a 3A Grade Hospital, in Beijing province.

15  
16  
17     7     **Participants** nine hundred and fourteen medical staff aged over 40 years were sampled. Seven hundred and ninety-seven valid  
18  
19     8     questionnaires were collected and used for further analysis. The sample included 94% of the Han population.

20  
21  
22     9     **Main outcome measures** The Copenhagen Psychosocial Questionnaire (COPSOQ) and Suboptimal Health Status  
23  
24     10     Questionnaires-25 (SHSQ-25) were used to assess the psychosocial factors at work and suboptimal health status, respectively.  
25  
26     11     Confirmative Factor Analysis (CFA) was conducted to establish the evaluating method of COPSOQ. A multivariate logistic  
27  
28     12     regression model was used to estimate the relationship between suboptimal health status and stress-related psychosocial work  
29  
30     13     factors among Chinese medical staff.

31  
32  
33     14     **Results** There was strong correlation among the five dimensions of COPSOQ based on the first-order factor model. Then, we  
34  
35     15     established two second-order factors including negative and positive psychosocial work stress factor to evaluate psychosocial  
36  
37     16     factors at work and the second-order factor model fit well. The high score of negative ( $OR$  (95%  $CI$ ) = 1.47 (1.34 to 1.62),  
38  
39     17      $P < 0.001$ ) and positive psychosocial work factor ( $OR$  (95%  $CI$ ) = 0.96 (0.94 to 0.98),  $P < 0.001$ ) increased and decreased the risk of  
40  
41     18     suboptimal health, respectively. This relationship remained statistically significant after adjusting for confounders and when using  
42  
43     19     different cut-offs of SHS.

44  
45  
46     20     **Conclusions** Among medical staff, the second-order factor model was a suitable method to evaluate the COPSOQ. The negative  
47  
48     21     and positive psychosocial work stress factor might be the risk and protective factor of suboptimal health, respectively. Moreover,  
49  
50     22     negative psychosocial work stress was the most associated factor to predict suboptimal health.

1 This is an Open Access article distributed in accordance with the Creative Commons Attribution Non Commercial (CC BY-NC  
2  
3 4.0) license, which permits others to distribute, remix, adapt, build upon this work non-commercially, and license their derivative  
4  
5 works on different terms, provided the original work is properly cited and the use is non-commercial. See:  
6  
7  
8 <http://creativecommons.org/licenses/by-nc/4.0/>  
9  
10  
11  
12  
13  
14  
15  
16  
17  
18

### Strengths and limitations of this study

- The study had high internal validity, with a good representation of medical staff.
- To assessment psychosocial factors at work among medical staff, a more parsimonious, modified second-factor model was finally built to replace the traditional method of calculating the average value of the COPSOQ which ignored the effect of each item.
- The study was conducted in Beijing (a dense city), adding evidence on these issues in a different context than the current literature.
- Although the sample was representative of the diversity of medical staff in one geographical area of the China, the data are not nationally representative and ethnic minority groups are particularly under-represented.
- The study used a cross-sectional design, which is not well suited to assess the direction of causation.



## 1. Introduction

Work is viewed as an important aspect of psychosocial stress and the impact of psychosocial work conditions on workers' health has been well documented over the past decades. There is accumulating evidence indicated an association between a harsh working environment and a wide range of diseases including mental disorders [1-2], diabetes [3] and cardiovascular disease [4-6] among workers. So far, several theories have been established that predicted various consequences for the health of workers when exposed to certain psychosocial risk factors at work [7]. Seven influential theories are the job characteristics model, the Michigan organizational stress model, the demand-control-(support) model, the sociotechnical approach, the action-theoretical approach, the effort-reward-imbalance model, and the vitamin model [8]. The Copenhagen Psychosocial Questionnaire (COPSOQ) is a comprehensive and generic instrument based on the integration of the common elements of seven kinds of pattern and development some of the original entry (such as work content) at the same time for the assessment of psychosocial factors at work. Exposure to workplace psychosocial risk factors varies according to the types of occupation and job role. Teachers, firefighters and hospital workers have been reported to experience higher level of work-related stress than average level [9-10].

Due to demographic changes, the number of old people and the incidence of chronic diseases are rising in China. Meanwhile, dealing with chronic diseases, incurable or dying patients are emotionally demanding [11]. In addition, there are rapid enhancements on treatment options and therapeutic strategies due to medical advances. These changes may lead to an increased workload and high quantitative demands for Chinese medical staff at hospital. Recent studies have been demonstrated that the prevalence of burnout and stress is relatively high among medical staff [12-13]. Stress fatigue and burnout further have a detrimental influence on the physicians' quality of life and may result in early retirement or reduced quality of patient care and negatively affects health-care systems [14-15]. What is more, studies have shown that medical staff is at increased risk for ill-health, including musculoskeletal disorders [16] and mental health problems [17], caused by adverse workplace factors. Consequently, we need to pay attention to the psychosocial work characteristics of medical staff.

Since the ancient time, traditional Chinese medicine has been identifying a physical status between health and disease which we coined as suboptimal health status (SHS) [18]. SHS is characterized by functional somatic syndromes or symptoms that are medically undiagnosed. Nowadays, much attention has been paid on perceived poor health "somatization" and "medically

1 unexplained symptoms” in community and primary care system located in developed countries [19-20]. Undoubtedly, SHS is  
2  
3 becoming a global issue. Recent studies ever reported that 60% of students [21] and 50-60% of occupational population [22-23]  
4  
5 suffered from suboptimal health in China. Unfortunately, impaired quality of life, frequent hospital visits and incurrence of  
6  
7 significant medical expenses were often accompanied with SHS [24]. Our previous studies have showed that SHS may contribute  
8  
9 to the progression or development of chronic diseases, such as cardiovascular disease [25]. Although the aforementioned study has  
10  
11 demonstrated the prevalence of SHS and its consequences, few studies that have addressed the issue of stress-related psychosocial  
12  
13 work factors and suboptimal health among medical staff in China. This study aimed to evaluate the impact of stress-related  
14  
15 psychosocial work factors on suboptimal health status and their associations.  
16  
17  
18  
19  
20

## 21 **2. Participants and Methods**

### 22 **2.1 Ethics Statement**

23  
24  
25 Approval was obtained from the Research Ethics Committee of Capital Medical University prior to the initiation of this project.  
26  
27  
28 All study participants provided written informed consent prior to enrollment in the study.  
29  
30  
31  
32

### 33 **2.2 Participants**

34  
35  
36 This cross-sectional study was conducted by clustered sampling method. The current analysis included 914 medical staff from  
37  
38 Xuanwu Hospital who participated in the 2014 annual health medical examination (including physicians, nurses, medical  
39  
40 technicians, management staff, et al.). All participants of this study were older than 40 years of age. The data were collected  
41  
42 through questionnaires of Suboptimal Health Status Questionnaires-25 (SHSQ-25) and Copenhagen Psychosocial Questionnaire  
43  
44 (COPSOQ). The subjects were divided into ‘SHS’ and ‘non-SHS’ group by the score of SHSQ-25.  
45  
46  
47  
48

### 49 **2.3 Instruments**

#### 50 **2.3.1 Copenhagen Psychosocial Questionnaire**

51  
52  
53 The Copenhagen Psychosocial Questionnaire (COPSOQ) is a comprehensive and generic instrument for the assessment of  
54  
55 psychosocial factors at work, which has been developed and validated by Kristensen and Borg of the Danish National Institute for  
56  
57  
58  
59  
60

1 Occupational Health in Copenhagen [8]. The Chinese translation and adaptation of COPSOQ had been tested in the population  
2  
3 with different professions, which had been shown good reliability and validity, with Cronbach's alpha coefficients of 0.7 for most  
4  
5 scales [26-27]. This instrument includes three versions: a long version for research use, a medium-length version to be used by  
6  
7 work environment professionals, and a short version for workplaces. Our study was based on the short Chinese version of  
8  
9 COPSOQ, which consists of 44 questions forming 8 scales. We selected 34 questions including 5 dimensions from a short version  
10  
11 of COPSOQ with namely 'Demands at work', 'Influence and development', 'Interpersonal relations and leadership', 'Insecurity at  
12  
13 work' and 'Job satisfaction' to assess psychosocial factors at work for stress [8]. In this survey, the remaining three health-related  
14  
15 dimensions, including 'general health', 'mental health' and 'vitality', in the original short version of COPSOQ were not used. For  
16  
17 most of the questions, we used either intensity (from "to a very small extent" to "to a very large extent") or frequency (from  
18  
19 "never/hardly ever" to "always"). All items of COPSOQ were transformed on a value range from 0 to 100 points with 0  
20  
21 representing the lowest degree of the measured psychosocial factor 'never/hardly ever' or 'to a very small extent', and 100  
22  
23 representing the highest 'always' or 'to a very large extent' (online supplementary table S1). In most scales, a high score was  
24  
25 considered desirable. On the contrary, a low score was considered desirable for 'Demands at work' and 'Insecurity at work'.  
26  
27  
28  
29  
30  
31  
32  
33  
34  
35  
36  
37  
38  
39  
40  
41  
42  
43  
44  
45  
46  
47  
48  
49  
50  
51  
52  
53  
54  
55  
56  
57  
58  
59  
60

### 2.3.2 Suboptimal Health Status Questionnaires-25

20 Suboptimal Health Status (SHS) was measured by the suboptimal health status questionnaire (SHSQ-25) [18] including 25 items  
21  
22 and encompassed five subscales: fatigue, the cardiovascular system, the digestive tract, the immune system and mental status. The  
23  
24 SHSQ-25 is short and easy to be completed, and therefore, suitable for use in general population and primary care service [23].  
25  
26 Each individual was asked to rate a specific statement on a 5-point Likert-type scale based on how often they suffered various  
27  
28 specific complaints in the preceding 3 months: never/ hardly ever, occasionally, often, very often, and always. The scores on the

1 questionnaire were coded as 0 to 4. SHS scores ranged from 0 to 100 were calculated for each respondent by summing the ratings  
2  
3 for the 25 items. A high score represents a high level of SHS (poor health).

4  
5  
6 There are no cut-off scores. The sample did not have high levels of suboptimal health (online supplementary table S2); therefore,  
7  
8 for an easier interpretation, participants with a SHSQ-25 score higher than 31 (median of the total sample) were classified as  
9  
10 'SHS', and those equal or lower than 31 were classified as 'non-SHS'. The sensitivity of our results to this choice was examined  
11  
12 further in sensitivity analyses by classifying the respondents with SHSQ-25 scores in the 75th percentile (P75) and above (a score  
13  
14 higher than 43) and in the 90th percentile (P90) and above (a score of 53 and above) as SHS and all others as non-SHS.  
15  
16  
17  
18

## 19 2.4 Statistical analysis

20  
21  
22 Descriptive statistics were used to describe the overall population. Univariate analyses were used to compare variations in  
23  
24 demographic characteristics among medical staff with different suboptimal health status; for Binary and categorical variable,  
25  
26 chi-square test was used, ordinal variable was analyzed by *Kolmogorov-Smirnov Z* test. For nonparametric data, *Mann-Whitney U*  
27  
28 test was used to assess stress-related working factors among medical staff with different health status. Demographic missing data  
29  
30 were coded as missing and excluded from relevant analysis. A Cronbach's alpha of  $>0.70$  is considered to be an acceptable  
31  
32 reliability coefficient for determining the internal consistency of the scale [29]. Model testing was conducted by confirmatory  
33  
34 factor analysis (CFA) and structural equation modeling (SEM) analyses. To assess global fit of the model by total sample, we  
35  
36 calculated five goodness-of-fit indices. They were  $\chi^2$  and its subsequent ratio with degrees of freedom ( $\chi^2/df$ ), adjusted  
37  
38 goodness-of-fit index (AGFI), comparative fit index (CFI), standard root mean square residual (SRMR) and root mean square  
39  
40 error of approximation (RMSEA). Evaluation standards were described in previous literature [30-32]. The first-order factor model  
41  
42 was used to analyze the correlation among the five dimensions of COPSOQ. And, the second-order factor model was to establish  
43  
44 the evaluating method of COPSOQ for comparing psychosocial work characteristics among medical staff. A multivariate logistic  
45  
46 regression model was used to estimate the relationship between suboptimal health status and psychosocial factors at work.  
47  
48 Potential confounders including age, gender, education level, occupation, physical exercise, drinking behavior, and smoking status  
49  
50 were adjusted. The two-tailed  $P < 0.05$  was considered to be statistically significant. The statistical packages SPSS 22.0 (Chicago,  
51  
52 Illinois) and AMOS 22.0 (Chicago, Illinois) were used for statistical analysis.  
53  
54  
55  
56  
57  
58  
59  
60

### 3. Results

#### 3.1 Baseline Characteristics

Among 914 of the medical staff participated in 2014 annual health medical examination 797 eligible questionnaires were retrieved, with the retrieval rate of 87.20%. The mean age was approximately 50, More than half of the participants were female (n=554, 69.5%). Table 1 showed the descriptive analyses of participants according to suboptimal health status. The differences in age, gender, education level, occupation and the status of physical exercise, smoking and drinking between individuals with and without SHS were statistically significant (All  $P < 0.05$ , Table 1). In sensitivity analyses of participant according suboptimal health status (P75 and P90) reported the same results. Moreover, compared with non-SHS individuals, SHS individuals were statistically significantly ( $P < 0.05$ ) more likely to be longer weekly working hours when using P75 as a SHS cut-off (online supplementary table S3). There were 396 (49.7%) individuals considered as SHS based on the score of SHSQ-25 (median). Among 396 suboptimal health individuals, 80.6 % was female, nearly half (48.2%) with the highest record of formal schooling was junior college, 31.8 % careered in nursing, 59.8 % was without the habit of physical exercise and mostly (>80%) didn't smoking and drinking (Table 1). This advantage in the proportion of corresponding variables above still existed and became more obvious in sensitivity analyses (online supplementary table S3).

#### 3.2 Reliability

The COPSOQ showed a very high overall internal consistency with Cronbach's alpha of 0.849 for the total scale (Items 1-34). The internal consistency characteristics of COPSOQ showed good reliability. The Cronbach's alpha about five dimensions were among 0.791 to 0.891 (online supplementary table S4).

#### 3.3 Confirmatory factor analysis

We performed confirmatory factor analysis (CFA) based on the five theoretical dimensions of COPSOQ. Parameters were estimated for the CFA model based on the maximum likelihood procedure involving fitting the variances and covariances among observed scores. AMOS therefore created a covariance matrix, including the variances and covariances among observed scores.

1 The next step was to illustrate the observed (items) and unobserved (factors) in the hypothesized model (see online supplementary  
2 figure S1). The goodness of fit index was unacceptable in M1a (Table 2). After modification according to modification index [33],  
3 the modified first-order factor model (M1b, see online supplementary figure S2) for COPSOQ had adequate fit of the model to the  
4 data (Table 2). However, Pearson correlations between first-order factors in M1b model showed that most of the first order factors  
5 correlated with each other (online supplementary table S4). These results supported the notion that the COPSOQ was comprised  
6 of five factors subsumed under one or two higher order factors. Based on the theoretical model of COPSOQ, high scores of F1  
7 (Demands at work) and F4 (Insecurity at work) means susceptible to work strain. Conversely, high scores of F2 (Influence and  
8 development), F3 (Interpersonal relations and leadership) and F5 (Job satisfaction) may protect people from work strain [26].  
9 According to the theory, the second-order factor model of COPSOQ might be tested. We next conducted CFA to formally test the  
10 fit of our hypothesized, second-order factor model (M2a) of COPSOQ. This model, depicted in online supplementary figure S3,  
11 didn't have good overall model fit (Table 2). This suggested M2a need further modification. M2a was modified (Figure 1) and the  
12 fit of the modified second-order model (M2b) was acceptable (Table 2).

13 The overall fit of modified factor first-order model (M1b) and modified second-order factor model (M2b) were similar. Thus, we  
14 further compared these two models. As a result, a  $\chi^2$  difference test revealed that modified second-order factor model was  
15 significantly better than modified factor first-order model ( $\Delta\chi^2=34.73$ ,  $P<0.05$ ), which suggested that the more parsimonious,  
16 modified second-order factor model (M2b) would be favored for COPSOQ. In M2b, D1 which referred to negative psychosocial work  
17 factor included two first-order factors (F1 Demands at work and F4 insecurity at work). And, D2 positive psychosocial work  
18 factor was composed by the rest three first-order factors (Influence and development, Interpersonal relations and leadership and  
19 Job satisfaction). All standardized factor coefficients of this model were significant ( $P<0.05$ , Figure 1). But, the relationship  
20 between insecurity at work and D1 negative psychosocial work factor was not significant ( $r=0.18$ ,  $P>0.355$ , Figure 1). Thus,  
21 demand at work was the largest contributor to the negative psychosocial work stress in current study.

### 22 **3.4 The assessment of stress-related psychosocial work factors among medical staff with different individual and work** 23 **characteristics**

24 We used the two second-order factors (D1 negative psychosocial work stress factor and D2 positive psychosocial work stress

factor) to assess the psychosocial work factors among medical staff. The factors score was calculated by standardized regression coefficients. In structural equation modeling, the standardized regression coefficients, also called standardized factor loadings, actually are the correlation coefficients between indicators and its latent variables. The form of standardized factor scores of the  $i$ th factor in first-order model is:

$$ZF_i = \sum_j b_{ij} (ZC_j - \overline{ZC_j})$$

Where  $b_{ij}$  are standardized regression weights,  $ZC_j$  is the standardized scores of the  $j$ th questionnaire item,  $\overline{ZC_j}$  is average standardized scores.  $i = 1,2,3,4,5$ ,  $j = 1,2,3,4,5,6,7,8,9,10$ ;

The form of standardized factor scores of the  $i$ th factor in first-order model is:

$$S = \sum W_i (ZF_i - \overline{ZF_i})$$

Where  $W_i$  are standardized regression weights,  $ZF_i$  is the standardized scores of the  $i$ th latent variable,  $\overline{ZF_i}$  is average standardized scores of 5 latent variable.  $i = 1,2,3,4,5$ .

Based on the above 2 formulas, we can get the score of D1 (negative psychosocial work factor) and D2 (positive psychosocial work factor) among medical staff. The two factors score did not meet the normal distribution assumptions, were conducted using the *Mann-Whitney U* non-parametric test by ranks. Table 1 showed the score of stress-related psychosocial work factors based on different individual and work characteristics. The score of negative psychosocial work stress factor was significantly different among medical staff with different age, education level, occupation, physical exercise, night shift and weekly working hours ( $P < 0.05$ ). While, the difference between men and women was not significant ( $P = 0.292$ ). In the other hand, the score of positive psychosocial work stress factor was significantly different among medical staff with different age, gender, occupation and the status of physical exercise, smoking and drinking ( $P < 0.05$ ). Then, we explored the score of psychosocial work stress factors between individuals with and without SHS, results shown in Table 3. The scores of negative and positive psychosocial factor were significantly different between SHS and non-SHS group ( $P < 0.05$ ). Briefly, the individuals with SHS were likely to get higher score of negative psychosocial work factor and lower score of positive psychosocial work factor, respectively. This difference stayed statistically significant when using SHS cut-offs of either P75 or P90 (Table 3).

### 3.5 The relationship between stress-related psychosocial work factors and suboptimal health (P50, P75 and P90)

Multivariate stepwise logistic regression models showed a statistically significant inverse relationship between positive psychosocial work stress factor and suboptimal health, and a positive relationship between negative psychosocial work stress factor and suboptimal health. Regarding negative psychosocial factor in the total sample, those who got higher score of negative psychosocial work stress factor had higher risk of being suboptimal than low-score individuals (model1: *OR* (95% *CI*)=1.47 (1.34 to 1.62),  $P<0.001$ ). This relationship remained statistically significant in the adjusted models (model2: *OR* (95% *CI*)=1.50 (1.36 to 1.66),  $P<0.001$ ; model3: *OR* (95% *CI*)=1.57 (1.42 to 1.75),  $P<0.01$ ) (Table 4) and when using SHS cut-offs of either P75 or P90. Considering the total sample, individuals with higher score of positive psychosocial work stress factor had a lower risk of being suboptimal health compared with those who got lower score (model1: *OR* (95% *CI*) = 0.96 (0.94 to 0.98),  $P<0.001$ ). This relationship remained statistically significant in the adjusted models (model2: *OR* (95% *CI*) = 0.97 (0.95 to 0.99),  $P=0.003$ ; model3: *OR* (95% *CI*) = 0.97 (0.95 to 0.99),  $P=0.012$ ) and in the majority of SHS sensitivity analyses (using cut-offs of P75 and P90), with the exception of the first-step adjusted and fully adjusted models using P90 as a SHS cut-off (model2: *OR* (95% *CI*) = 0.97 (0.94 to 1.01),  $P=0.155$ ; model2: *OR* (95% *CI*) = 0.98 (0.95 to 1.02),  $P=0.325$ ).

## 4. Discussion

As the development of social economy and the rapid pace of life, public have paid more and more attention to the importance of suboptimal health. SHS is regarded as a subclinical, reversible stage of chronic disease, which is characterized by a decline in vitality, in physiological function and in the capacity for adaptation within a period of three months [18]. For measurement of SHS, we developed SHSQ-25 and adopted it as an instrument in this study. SHSQ-25 has good internal consistency, which item-subscale correlations ranged from 0.51 to 0.72, with Cronbach's  $\alpha$  of 0.70 or higher for all subscales [23]. The good internal consistency (cronbach's  $\alpha$  of 0.943) was also verified in our study (not shown in our study). Multiple factors which were influential to SHS, including gender, age, physical activities, dietary habits, emotional problems, social adaptation, etc. have been found in recent studies [22, 25]. In corresponded, age, gender, education level, job, physical exercise, smoking and drinking were significant factors that may influence the status of health among medical staff in current study. There was no internationally accepted cutoff value to diagnose SHS. Thus, we further conducted a sensitivity analysis in which the results also valid. Overall,



1 the female nurses without the ways to relieve stress, such as habit of physical exercise, smoke and drink, were higher score of  
2  
3 SHSQ-25 (poorer health).  
4

5  
6 Over the last 20 years, rare longitudinal and many cross-sectional studies have highlighted work organization conditions,  
7  
8 including repetitive work [34], decision authority [35], physical and emotional demands [36], irregular schedules and long hours  
9  
10 [37-38], and job insecurity [39] were the stress-related work factors to explain the emergence or aggravation of mental illness. In  
11  
12 addition, low job satisfaction that was also found to be important contributors to occupational stress in healthcare settings in  
13  
14 different studies [40-41]. The relation of mental work load and health status based on documented measuring instruments which  
15  
16 covered all important aspects was undisputedly increased. For enterprises and organizations, the COPSOQ questionnaire is a  
17  
18 qualified screening-instrument for psychosocial factors at work [42]. It has good internal consistency with Cronbach's  $\alpha$  of 0.79 or  
19  
20 even higher for all subscales in our study. But scale scores were computed as the average of the values of the single aspects, this  
21  
22 method ignored the relationship among each dimension. Previous studies [28] also showed the factor loadings calculated by  
23  
24 traditional factor analysis were less accurate and precise than that calculated by structural equation modeling, due to the traditional  
25  
26 method could not control the effects of other variables and caused message loss when extracting common factors. By contrast,  
27  
28 structural equation modeling could get factor loadings both of indicators to first-order factors and first-order factors to second-order  
29  
30 factors. The standardized regression coefficients estimated the relational degree between indicators and first-order factors,  
31  
32 first-order factors and second-order factors under controlling other variables. The other difference with traditional method is that  
33  
34 structural equation modeling allows measurement error of indicators.  
35  
36  
37  
38  
39  
40  
41  
42

43 Based on the above comparison and consideration, we conducted first- and second-order factor model to explore the association  
44  
45 among dimensions of COPSOQ. In this study, a modified second-factor model with best fit indexes was considered to be favored  
46  
47 for COPSOQ. Therefore, the stress-related psychosocial work factors of medical staff were assessed by modified second-order  
48  
49 factor model (M2b). In M2b, the relationship between insecurity at work and negative psychosocial work factor was not  
50  
51 significant. This result reflected subjects faced the risk of unemployment was very low in our study. It was accorded with the  
52  
53 actual investigation in which subjects were on-the-job medical staff (older than 40 years of age) whose careers have "reached a  
54  
55 stable position". The prevalence rate of SHS was 49.7% when using P50 as cutoff value in our study. Although they were low  
56  
57  
58  
59  
60

1 1 insecurity at work, they were in high risk of SHS because of the high pressure during the inservice.  
2  
3  
4 2 The clinician as a kind of special population, they need possess highly concentrated attention, sensible thinking, exquisite  
5  
6 3 techniques and experiences. Moreover, lasting work and intensive labor intensity make them suffer more stress than other medical  
7  
8 4 specialties. Previous research suggested that psychosocial stress may result from gendered processes [43], such as uneven family  
9  
10 5 responsibilities, gender-specific harassment or discrimination, and unequal levels of poverty which mainly limited the professional  
11  
12 6 influence and development of female. In current study, the difference in the score of negative psychosocial work stress factor  
13  
14 7 between men and women was not significant. But, women were lower score of positive psychosocial work stress factor than men  
15  
16 8 ( $P<0.05$ ). In other word, women were more likely to suffer from stress-related psychosocial work factors than men. The gender  
17  
18 9 gap in suboptimal health status in our study may be explained by the discriminatory impact of gender on the susceptible to  
19  
20 10 stress-related psychosocial work factors and the individuals with high level of psychosocial work stress were high risk group of  
21  
22 11 SHS. Additionally, age was also a significant factor affecting the stress levels [44-45]. Meanwhile, individuals with higher levels  
23  
24 12 of education report greater psychological demands [46]. Similarly, we found older male nonclinical medical staff with habit of  
25  
26 13 physical exercise, smoking and drinking reported higher score of positive psychosocial work factors (less susceptible to work  
27  
28 14 strain). While, younger clinical doctors with graduate degree or above who were lack of exercise, on night shift, and longer  
29  
30 15 man-hour (longer than 40 hour per week) reported higher score of negative psychosocial work factor (more susceptible to work  
31  
32 16 strain). In our study, psychosocial work stress factors, especially the negative side, was the mentioned factor influencing the risk  
33  
34 17 of suboptimal health among medical staff. This relationship was also found in population of executive employees [47].  
35  
36 18 The results of this study provided some important insights for supervisors and managers in hospital. Positive effects of work in the  
37  
38 19 medical services should be maximized. And the consequences of work-related risk factors, such as demands and insecurity at  
39  
40 20 work, in this important profession, should be prevented. Moreover, Yan YX, et al [25] indicated that SHS is associated with  
41  
42 21 cardiovascular risk factors and contributes to the development of cardiovascular disease. Therefore, it's less likely to be a question  
43  
44 22 that the above measures are effective to prevent SHS, and further reduce the risks of cardiovascular disease.  
45  
46  
47  
48  
49  
50  
51  
52  
53  
54  
55

## 56 23 **5. Conclusion**

57  
58  
59  
60

1 The modified second-order factor model was a suitable method to evaluate COPSOQ among medical staff. In this population, the  
2 negative and positive psychosocial work stress factors might be the risk and protective factor of suboptimal health, respectively.  
3 Negative psychosocial work stress was the most associated factor to predict suboptimal health.

#### 4 **Supplementary Materials**

5 Supplementary File 1. pdf

6 Supplementary File 2. pdf

#### 7 **Acknowledgments**

8 The authors thank the staff at Xuanwu Hospital for their support. They also thank all participants in this study for their voluntary  
9 participation.

#### 10 **References**

- 11 1. Chen SW. Job stress models, depressive disorders and work performance of engineers in microelectronics industry. *Int Arch*  
12 *Occup Environ Health* 2011; 84: 91–103. doi: 10.1007/s00420-010-0538-y
- 13 2. Grynderup MB, Mors O, Hansen AM, et al. Work-unit measures of organisational justice and risk of depression: a 2-year  
14 cohort study. *Occup Environ Med* 2013; 70: 380–385. doi: 10.1136/oemed-2012-101000
- 15 3. Pranita A, Balsubramanian B, Phadke AV, et al. Association of occupational & prediabetes statuses with obesity in middle  
16 aged women. *J Clin Diagn Res* 2013; 7: 1311–1313. doi: 10.7860/JCDR/2013/5466.3134
- 17 4. Du CL. Workplace justice and psychosocial work hazards in association with return to work in male workers with coronary  
18 heart diseases: a prospective study. *Int J Cardiol* 2013; 166: 745–747. doi: 10.1016/j.ijcard.2012.09.176
- 19 5. Park J, Kim Y, Cheng Y, et al. A comparison of the recognition of overwork-related cardiovascular disease in Japan, Korea,  
20 and Taiwan. *Ind Health* 2012; 50:17–23. doi: 10.2486/indhealth.MS1317
- 21 6. Belkic KL, Landsbergis PA, Schnall PL, et al. Is job strain a major source of cardiovascular disease risk? A systematic  
22 review on cohort studies. *Scand J Work Environ Health* 2004; 30: 85–128. doi:10.5271/sjweh.769

- 1 1 7. Fishta A, Backé EM. Psychosocial stress at work and cardiovascular diseases: an overview of systematic reviews. *Int Arch*  
2  
3 2 *Occup Environ Health*. 2015; 88(8): 997-1014. doi: 10.1007/s00420-015-1019-0  
4  
5 3 8. Kristensen TS, Hannerz H, Høgh A, et al. The Copenhagen Psychosocial Questionnaire - a tool for the assessment and  
6 4 improvement of the psychosocial work environment. *Scand J Work Environ Health* 2005, 31: 438-449. doi: 10.5271/sjweh.  
7 5 948  
8  
9  
10 6 9. Tsutsumi A, Kayaba K, Nagami M, et al. The effort-reward imbalance model: experience in Japanese working population. *J*  
11  
12 *Occup Health* 2002; 44: 398–407. doi: 10.1539/joh.44.398  
13 7  
14  
15 8 10. Johnson S, Cooper C, Cartwright S, et al. The experience of work related stress across occupations. *J Manag Psychol* 2005;  
16 9 20: 1–2. doi: 10.1108/02683940510579803  
17  
18  
19 10 11. Wallace JE, Lemaire JB, Ghali WA. Physician wellness: A missing quality indicator. *Lancet* 2009; 374: 1714–21. doi:  
20  
21 10.1016/S0140-6736(09)61424-0  
22 11  
23  
24 12 12. Alacacioglu A, Yavuzsen T, Dirioz M, et al. Burnout in nurses and physicians working at an Oncology department.  
25  
26 *Psychooncology* 2009; 18: 543–8. doi: 10.1002/pon.1432  
27 13  
28  
29 13 13. Sehlen S, Vordermark D, Schäfer C, et al. Job stress and job satisfaction of physicians, radiographers, nurses and physicists  
30  
31 working in radiotherapy: A multicenter analysis by the DEGRO Quality of Life Work Group. *Radiat Oncol* 2009; 4: 6–15.  
32 14  
33 doi: 10.1186/1748-717X-4-6  
34  
35  
36 14 14. Firth-Cozens J, Greenhalgh J. Doctors' perceptions of the links between stress and lowered clinical care. *Soc Sci Med* 1997;  
37 15  
38 44: 1017–22. doi: 10.1016/S0277-9536(96)00227-4  
39  
40  
41 15 15. Fahrenkopf AM, Sectish TC, Barger LK, et al. Rates of medication errors among depressed and burnt out residents:  
42 16  
43 prospective cohort study. *BMJ* 2008; 336: 488–91. doi: 10.1136/bmj.39469.763218.BE  
44  
45  
46 16 16. Alexopoulos EC, Burdorf A, Kalokerinou A. Risk factors for musculoskeletal disorders among nursing personnel in Greek  
47 17  
48 hospitals. *Int Arch Occup Environ Health* 2003; 76: 289–294. doi: 10.1007/s00420-003-0442-9  
49  
50  
51 17 17. Rafnsdottir GL, Gunnarsdottir HK, Tomasson K. Work organization, well-being and health in geriatric care. *Work* 2004; 22:  
52  
53  
54  
55  
56  
57  
58  
59  
60

- 1 1 49–55. PMID: 14757906
- 2
- 3
- 4 2 18. Wang W, Russell A, Yan YX. Traditional Chinese medicine and new concepts of predictive, preventive and personalized
- 5
- 6 3 medicine in diagnosis and treatment of suboptimal health. *EPMA J.* 2014; 5: 4. doi: 10.1186/1878-5085-5-4
- 7
- 8
- 9 4 19. Woolfolk RL, Allen LA. *Treating somatization: a cognitive-behavioural approach.* New York, NY: Guilford; 2007.
- 10
- 11
- 12 5 20. Brown RJ. Introduction to the special issue on medically unexplained symptoms: background and future directions. *Clin*
- 13
- 14 6 *Psychol Rev.* 2007; 27(7):769–780. doi: 10.1016/j.cpr.2007.07.003
- 15
- 16
- 17
- 18 7 21. Bi J, Huang Y, Xiao Y, et al. Association of lifestyle factors and suboptimal health status: a cross sectional study of Chinese
- 19
- 20 8 students. *BMJ Open* 2014; 4: e005156. doi: 10.1136/bmjopen-2014-005156
- 21
- 22
- 23 9 22. Wu S Xuan Z, Li F, et al. Work-Recreation Balance, Health-Promoting Lifestyles and Suboptimal Health Status in Southern
- 24
- 25 10 China: A Cross-Sectional Study. *Int J Environ Res Public Health* 2016; 13: 339-354. doi: 10.3390/ijerph13030339
- 26
- 27
- 28
- 29 11 23. Yan YX, Liu YQ, Li M, et al. Development and evaluation of a questionnaire for measuring suboptimal health status in urban
- 30
- 31 12 Chinese. *J Epidemiol* 2009; 19: 333–341. doi: 10.2188/jea.JE20080086
- 32
- 33
- 34 13 24. Joustra M.L., Janssens K.A., Bultmann U., Rosmalen J.G. Functional limitations in functional somatic syndromes and
- 35
- 36 14 well-defined medical diseases. Results from the general population cohort LifeLines. *J. Psychosom. Res.* 2015; 79: 94–99.
- 37
- 38 15 doi: 10.1016/j.jpsychores.2015.05.004
- 39
- 40
- 41
- 42 16 25. Yan YX, Do J, Liu YQ, et al. Association of suboptimal health status and cardiovascular risk factors in urban Chinese
- 43
- 44 17 workers. *J Urban Health* 2012; 89: 329–338. doi: 10.1007/s11524-011-9636-8
- 45
- 46
- 47
- 48 18 26. Shang L, Liu P, Fan LB, et al. Psychometric Properties of the Chinese Version of Copenhagen Psychosocial Questionnaire
- 49
- 50 19 [article in China]. *J Environ Occup Med* 2008; 25: 572-576.
- 51
- 52
- 53 20 27. Meng SJ, Yan YX, Liu YQ, et al. Reliability and validity of Copenhagen Psychosocial Questionnaire of Chinese [article in
- 54
- 55 21 China]. *Chin Prev Med* 2013; 14:12-15.
- 56
- 57
- 58
- 59 22 28. Babyak M, Green S. Confirmatory factor analysis: An introduction for psychometric medicine researchers. *Psychosomatic*
- 60

- 1 1 Medicine 2010; 72: 587-597. doi: 10.1097/PSY.0b013e3181de3f8a
- 2
- 3
- 4 2 29. Nunnally JC, Bernstein IH. Psychometric theory, 3rd Ed. McGraw-Hill, New York, London, 1994; pp.701.
- 5
- 6
- 7 3 30. Kline RB. Measurement models and confirmatory factor analysis. In Principles and practice of structural equation modeling,
- 8
- 9 4 3rd Ed. The Guilford Press: New York, London, 2005; pp. 230-51.
- 10
- 11
- 12 5 31. Hu LT, Bentler PM. Cutoff criteria for fit indexes in covariance structure analysis: conventional criteria versus new
- 13
- 14 6 alternatives. Structural Equation Modeling 1999; 6: 1-55. doi: 10.1080/10705519909540118
- 15
- 16
- 17 7 32. Tavakol S, Dennick R, Tavakol M. Psychometric properties and confirmatory factor analysis of the Jefferson Scale of
- 18
- 19 8 Physician Empathy. BMC Med Educ 2011; 11: 54-61. doi: 10.1186/1472-6920-11-54
- 20
- 21
- 22
- 23 9 33. Barbara MB. Structural Equation Modeling With AMOS: Basic Concepts, Applications, and Programming, 2nd Ed. Taylor &
- 24
- 25 10 Francis Group: New York, London, 2001; pp. 108-11.
- 26
- 27
- 28
- 29 11 34. Shirom A, Westman M, Melamed S. The effects of pay systems on blue-collar employees' emotional distress: the mediating
- 30
- 31 12 effects of objective and subjective work monotony. Human Relations 1999; 52: 1077-1097. doi: 10.1023/A:1016935708825
- 32
- 33
- 34 13 35. Stansfeld SA, Fuhrer R, Shipley MJ, Marmot MG. Work characteristics predict psychiatric disorder: prospective results from
- 35
- 36 14 the Withehall II study. Occupational and Environmental Medicine 1999; 56: 302-307. PMID: 10472303
- 37
- 38
- 39
- 40 15 36. Bultmann U, Kant IJ, Van den Brandt PA, et al. Psychosocial work characteristics as risk factors for the onset of fatigue and
- 41
- 42 16 psychological distress: prospective results from the Maastricht Cohort Study. Psychol Med 2002; 32: 333-345. PMID:
- 43
- 44 17 11871373
- 45
- 46
- 47
- 48 18 37. Spurgeon A, Harrington JM, Cooper CL. Health and safety problems associated with long working hours: a review of the
- 49
- 50 19 current position. Occupational and Environmental Medicine 1997; 54: 367-375. PMID: 9245942
- 51
- 52
- 53 20 38. P. Bohle, J. Tilley. The impact of night work on psychological well-being Ergonomics 1989; 32: 1089-1099. doi:
- 54
- 55 21 10.1080/00140138908966876
- 56
- 57
- 58
- 59 22 39. Virtanen P, Janlert U, Hammarström A. Exposure to temporary employment and job insecurity: a longitudinal study of the
- 60

- 1 health effects. *Occup Environ Med* 2011; 68: 570-4. doi: 10.1136/oem.2010.054890
- 2
- 3
- 4 40. Fiabane E, Giorgi I, Musian D, Sguazzin C, Argentero P. Occupational stress and job satisfaction of healthcare staff in
- 5
- 6 3 rehabilitation units. *Med Lav*. 2012; 103 (6): 482-92. PMID: 23405482
- 7
- 8
- 9 41. Weinberg A, Creed F. Stress and psychiatric disorder in healthcare professionals and hospital staff. *Lancet*. 2000; 355 (9203):
- 10
- 11 533-7. doi: 10.1016/S0140-6736(99)07366-3
- 12
- 13
- 14
- 15 42. Nubling M, Stobel U, Hasselhom M, et al. Measuring psychological stress and strain at work: evaluation of the COPSOQ
- 16
- 17 7 Questionnaire in Germany. *GMS Psychosoc Med* 2006; 3: 1-14. PMID: 19742072
- 18
- 19
- 20 43. Springer KW, Mager Stellman J, Jordan-Young RM. Beyond a catalogue of differences: a theoretical frame and good
- 21
- 22 9 practice guidelines for researching sex/gender in human health. *Soc Sci Med* 2012; 74: 1817–1824. doi: 10.1016/j.
- 23
- 24 socscimed.2011.05.033
- 25 10
- 26
- 27
- 28 44. Choi ES, Ha Y. Work-related stress and risk factors among Korean employees. *J Korean Acad Nurs* 2009; 39: 549-61. doi:
- 29
- 30 10.4040/jkan.2009.39.4.549
- 31 12
- 32
- 33
- 34 45. Purcell SR, Kutash M, Cobb S. The relationship between nurses' stress and nurse staffing factors in a hospital setting. *J Nurs*
- 35
- 36 14 *Manag* 2011; 19: 714-20. doi: 10.1111/j.1365-2834.2011.01262.x
- 37
- 38
- 39 46. Landsbergis P, Grzywacz JG, LaMontage AD. Work Organization, job insecurity, and occupational health disparities. *Am J*
- 40
- 41 16 *Ind Med* 2014; 57: 495-515. doi: 10.1002/ajim.22126
- 42
- 43
- 44
- 45 47. Hsu SH, Chen DR, Cheng Y, et al. Association of Psychosocial Work Hazards with Depression and Suboptimal Health in
- 46
- 47 18 Executive Employees. *JOEM* 2016; 58:728-736. doi: 10.1097/JOM.0000000000000760
- 48
- 49
- 50 19
- 51
- 52
- 53 20
- 54
- 55
- 56 21
- 57
- 58
- 59
- 60

**Footnotes**

Yingzhi Liang and Shijiao Meng contributed equally to this work.

**Contributors**

Yuxiang Yan, lead and corresponding author, had full access to the data in the study and takes responsibility for the integrity of the data and the accuracy of the data analysis. Yingzhi Liang wrote the majority of the manuscript, provided critical revisions to the manuscript and aided substantially in the preparation of the revised submission. Shijiao Meng and Lijuan Wu provided input into study design, performed many of the data analysis, made substantial critical revisions and aided with interpretation. Jie Zhang and Xi Chu aided with interpretation. All authors read and approved the final manuscript.

**Funding**

This work was supported by the National Science Foundation (81573214), the Beijing Municipal Nature Science Foundation (7162020), the Scientific Research Project of Beijing Municipal Educational Committee (KM201510025006), and the National Key Research and Development Plan (2016YFC0900603).

**Competing interests**

The authors declare that they have no competing interests.

**Ethics approval and consent to participate**

This study and associated protocols were conducted after approval by the Research Ethics Committee of Capital Medical University. All research participants consented to having their anonymous data included in the analyses reported herein.

**Provenance and peer review**

Not commissioned; externally peer reviewed.

**Availability of data and materials**

The datasets used and/or analyzed during this study are available from the corresponding author on reasonable request.



**Table 1** Descriptive analyses of participants according to suboptimal health status and the stress-related psychosocial work factors as a total sample

| Demographics                | Total (N=797) | SHSQ-25 (P50) |            | Second-order factor of COPSOQ |                                             |         |                                             |         |
|-----------------------------|---------------|---------------|------------|-------------------------------|---------------------------------------------|---------|---------------------------------------------|---------|
|                             | n (%)         | Non-SHS       | SHS        | P                             | D1 negative psychosocial work stress factor | P       | D2 positive psychosocial work stress factor | P       |
| <b>Age group(years)</b>     |               |               |            | 0.005*                        |                                             | 0.003   |                                             | 0.007   |
| 40~                         | 270 (33.9)    | 118 (29.4)    | 152 (38.4) |                               | 0.21 ± 1.65<br>0.15 (-1.14, 1.32)           |         | -0.80 ± 7.00<br>0.15 (-5.52, 4.17)          |         |
| 45~                         | 245 (30.7)    | 126 (31.4)    | 119 (30.1) |                               | 0.07 ± 1.72<br>-0.1 (-1.28, 1.24)           |         | -0.29 ± 6.84<br>0.46 (-4.39, 4.76)          |         |
| 55~68                       | 282 (35.4)    | 157 (39.2)    | 125 (31.6) |                               | 0.26 ± 1.70<br>-0.47 (-1.55, 0.88)          |         | 1.01 ± 7.35<br>1.08 (-2.93, 6.78)           |         |
| <b>Gender</b>               |               |               |            | < 0.001                       |                                             | 0.292   |                                             | < 0.001 |
| Male                        | 243 (30.5)    | 166 (41.4)    | 77 (19.4)  |                               | -0.05 ± 1.88<br>-0.17 (-1.67, 1.20)         |         | 1.24 ± 7.29<br>1.54 (-3.33, 6.82)           |         |
| Female                      | 554 (69.5)    | 235 (58.6)    | 319 (80.6) |                               | 0.02 ± 1.62<br>-0.11 (-1.22, 1.14)          |         | -0.54 ± 6.96<br>0.24 (-5.02, 4.31)          |         |
| <b>Education level</b>      |               |               |            | 0.003*                        |                                             | < 0.001 |                                             | 0.111   |
| High school and below       | 122 (15.3)    | 65 (16.20)    | 57 (14.4)  |                               | -0.41 ± 1.81<br>-0.62 (-1.90, 0.64)         |         | 0.55 ± 7.79<br>1.19 (-3.74, 6.23)           |         |
| Junior college              | 321 (40.3)    | 130 (32.4)    | 191 (48.2) |                               | -0.07 ± 1.65<br>-0.21 (-1.39, 1.04)         |         | -0.78 ± 7.44<br>0.17 (-5.81, 4.35)          |         |
| University                  | 182 (22.8)    | 102 (25.4)    | 80 (20.2)  |                               | -0.15 ± 1.71<br>-0.37 (-1.52, 1.01)         |         | 0.62 ± 6.68<br>1.22 (-3.60, 5.47)           |         |
| Graduate students and above | 172 (21.6)    | 104 (25.9)    | 68 (17.2)  |                               | 0.57 ± 1.56<br>0.70 (-0.65, 1.63)           |         | 0.42 ± 6.30<br>0.66 (-4.28, 5.17)           |         |
| <b>Occupation</b>           |               |               |            | < 0.001                       |                                             | < 0.001 |                                             | 0.001   |
| Nurses                      | 188 (23.6)    | 62 (15.5)     | 126 (31.8) |                               | 0.22 ± 1.57<br>0.13 (-0.99, 1.16)           |         | -1.15 ± 7.35<br>-0.10 (-7.17, 4.10)         |         |
| Medical technicians         | 187 (23.5)    | 83 (20.7)     | 104 (26.3) |                               | -0.30 ± 1.59<br>-0.43 (-1.64, 1.02)         |         | -0.85 ± 6.75<br>-0.20 (-5.48, 3.46)         |         |
| Doctors                     | 208 (26.1)    | 125 (31.2)    | 83 (21.0)  |                               | 0.37 ± 1.72<br>0.31 (-0.93, 1.53)           |         | 0.70 ± 6.97<br>0.94 (-4.19, 6.67)           |         |
| Others                      | 214 (26.9)    | 131 (32.7)    | 83 (21.0)  |                               | -0.29 ± 1.78<br>-0.60 (-1.77, 0.89)         |         | 1.06 ± 7.13<br>1.44 (-2.78, 5.51)           |         |
| <b>Physical exercise</b>    |               |               |            | 0.003                         |                                             | 0.001   |                                             | 0.022   |
| Yes                         | 363 (45.5)    | 204 (50.9)    | 159 (40.2) |                               | -0.19 ± 1.76<br>-0.48 (-1.69, 1.14)         |         | 0.51 ± 7.30<br>1.12 (-4.27, 5.77)           |         |
| No                          | 434 (54.5)    | 197 (49.1)    | 237 (59.8) |                               | 0.16 ± 1.63<br>0.12 (-1.02, 1.18)           |         | -0.43 ± 6.92<br>0.33 (-5.03, 4.32)          |         |
| <b>Smoking</b>              |               |               |            | < 0.001                       |                                             | 0.082   |                                             | 0.013   |
| Yes                         | 93 (11.7)     | 63 (15.7)     | 30 (7.6)   |                               | -0.19 ± 2.04<br>-0.90 (-1.77, 1.16)         |         | 1.58 ± 7.80<br>2.16 (-3.16, 7.23)           |         |
| No/Quit                     | 704 (88.3)    | 338 (84.3)    | 366 (92.4) |                               | 0.02 ± 1.65<br>-0.09 (-1.28, 1.16)          |         | -0.21 ± 6.99<br>0.47 (-4.72, 4.78)          |         |
| <b>Drinking</b>             |               |               |            | < 0.001                       |                                             | 0.081   |                                             | 0.012   |
| Yes                         | 166 (20.8)    | 105 (26.2)    | 61 (15.4)  |                               | -0.18 ± 1.78<br>-0.66 (-1.56, 1.04)         |         | 1.18 ± 7.13<br>1.39 (-2.83, 6.72)           |         |
| No/Abstained                | 631 (79.2)    | 296 (73.8)    | 335 (84.6) |                               | 0.05 ± 1.68<br>-0.84 (-1.30, 1.16)          |         | -0.31 ± 7.07<br>0.37 (-4.93, 4.75)          |         |
| <b>Night shift</b>          |               |               |            | 0.774                         |                                             | < 0.001 |                                             | 0.445   |
| Yes                         | 331 (41.5)    | 169 (42.1)    | 162 (40.9) |                               | 0.27 ± 1.71<br>0.22 (-1.08, 1.36)           |         | -0.21 ± 7.04<br>0.46 (-4.42, 4.78)          |         |
| No                          | 466 (58.5)    | 232 (57.9)    | 234 (59.1) |                               | -0.19 ± 1.67<br>-0.39 (-1.53, 0.96)         |         | 0.15 ± 7.16<br>0.67 (-4.68, 5.22)           |         |
| <b>Weekly working hours</b> |               |               |            | 0.455                         |                                             | < 0.001 |                                             | 0.827   |
| ≤40 hours                   | 270 (33.9)    | 141 (35.2)    | 129 (32.6) |                               | -0.49 ± 1.60<br>-0.71 (-1.78, 0.56)         |         | 0.13 ± 6.92<br>0.57 (-4.45, 5.07)           |         |
| >40 hours                   | 527 (66.1)    | 260 (64.8)    | 267 (67.4) |                               | 0.25 ± 1.70<br>0.17 (-1.10, 1.43)           |         | -0.06 ± 7.21<br>0.70 (-4.62, 5.11)          |         |

Noted: \* analyzed by Kolmogorov-Smirnov Z test.

**Table 2** Goodness-of-fit indices for the different models

| Model | $\chi^2$ (df) | $\chi^2/df$ | CFI   | AGFI  | SRMR   | RMSEA |
|-------|---------------|-------------|-------|-------|--------|-------|
| M1a   | 4216.39(517)  | 8.16        | 0.737 | 0.708 | 0.0802 | 0.095 |
| M1b   | 1699.40(503)  | 3.40        | 0.915 | 0.864 | 0.0696 | 0.055 |
| M2a   | 4276.30(521)  | 8.21        | 0.733 | 0.707 | 0.0852 | 0.095 |
| M2b   | 1664.67(508)  | 3.28        | 0.918 | 0.866 | 0.0659 | 0.053 |

Noted: M1a: the first-order factor model; M1b: the modified first-order factor model; M2a: the second-order factor model; M2b: the modified second-order factor model.

Model fitting criteria were as followed: A CFI value of greater than 0.90 showed a psychometrically acceptable fit to the data; The value of AGFI ranged between 0 and 1, a value of 1 indicated a perfect fit; For the SRMR, values of 0.08 or lower represented good fit; The value of RMSEA should be below 0.06 to show good fit.

For peer review only

**Table 3.** The assessment of stress-related psychosocial work factors between individuals with and without SHS

| groups                         | Second-order factor of COPSOQ               |          |                                             |          |
|--------------------------------|---------------------------------------------|----------|---------------------------------------------|----------|
|                                | D1 negative psychosocial work stress factor | <i>P</i> | D2 positive psychosocial work stress factor | <i>P</i> |
| suboptimal health status (P50) |                                             | <0.001   |                                             | <0.001   |
| Non-SHS                        | -0.53 ± 1.60                                |          | 1.15 ± 6.97                                 |          |
|                                | -0.77 (-1.83, 0.54)                         |          | 1.61 (-2.79, 6.34)                          |          |
| SHS                            | 0.53 ± 1.63                                 |          | -1.16 ± 7.06                                |          |
|                                | 0.46 (-0.67, 1.60)                          |          | -0.57 (-5.75, 3.94)                         |          |
| suboptimal health status (P75) |                                             | <0.001   |                                             | <0.001   |
| Non-SHS                        | -0.24 ± 1.67                                |          | 0.71 ± 7.08                                 |          |
|                                | -0.39 (-1.62, 0.91)                         |          | 1.24 (-3.85, 5.69)                          |          |
| SHS                            | 0.77 ± 1.57                                 |          | -2.29 ± 6.73                                |          |
|                                | 0.70 (-0.44, 1.86)                          |          | -1.93 (-7.11, 2.60)                         |          |
| suboptimal health status (P90) |                                             | <0.001   |                                             | 0.005    |
| Non-SHS                        | -0.09 ± 1.68                                |          | 0.29 ± 7.13                                 |          |
|                                | -0.20 (-1.47, 1.08)                         |          | 0.78 (-4.39, 5.22)                          |          |
| SHS                            | 0.90 ± 1.68                                 |          | -2.14 ± 6.57                                |          |
|                                | 0.57 (-0.44, 2.19)                          |          | -1.93 (-7.23, 2.18)                         |          |

1  
2  
3  
4  
5  
6  
7  
8  
9  
10  
11  
12  
13  
14  
15  
16  
17  
18  
19  
20  
21  
22  
23  
24  
25  
26  
27  
28  
29  
30  
31  
32  
33  
34  
35  
36  
37  
38  
39  
40  
41  
42  
43  
44  
45  
46  
47  
48  
49  
50  
51  
52  
53  
54  
55  
56  
57  
58  
59  
60

**Table 4** Sensitivity analyses with multivariate models assessing the relationship between stress-related psychosocial work factors and suboptimal health (P50, P75 and P90)

| Model / variables                           | suboptimal health status (P50, P75, P90) |           |        |
|---------------------------------------------|------------------------------------------|-----------|--------|
|                                             | OR                                       | OR 95%CI  | P      |
| suboptimal health status (P50)              |                                          |           |        |
| Model1                                      |                                          |           |        |
| D1 negative psychosocial work stress factor | 1.47                                     | 1.34-1.62 | <0.001 |
| D2 positive psychosocial work stress factor | 0.96                                     | 0.94-0.98 | <0.001 |
| Model2                                      |                                          |           |        |
| D1 negative psychosocial work stress factor | 1.50                                     | 1.36-1.66 | <0.001 |
| D2 positive psychosocial work stress factor | 0.97                                     | 0.95-0.99 | 0.003  |
| Model3                                      |                                          |           |        |
| D1 negative psychosocial work stress factor | 1.57                                     | 1.42-1.75 | <0.001 |
| D2 positive psychosocial work stress factor | 0.97                                     | 0.95-0.99 | 0.012  |
| suboptimal health status (P75)              |                                          |           |        |
| Model1                                      |                                          |           |        |
| D1 negative psychosocial work stress factor | 1.39                                     | 1.26-1.54 | <0.001 |
| D2 positive psychosocial work stress factor | 0.95                                     | 0.93-0.97 | <0.001 |
| Model2                                      |                                          |           |        |
| D1 negative psychosocial work stress factor | 1.42                                     | 1.28-1.58 | <0.001 |
| D2 positive psychosocial work stress factor | 0.95                                     | 0.93-0.98 | <0.001 |
| Model3                                      |                                          |           |        |
| D1 negative psychosocial work stress factor | 1.44                                     | 1.29-1.61 | <0.001 |
| D2 positive psychosocial work stress factor | 0.96                                     | 0.93-0.98 | 0.001  |
| suboptimal health status (P90)              |                                          |           |        |
| Model1                                      |                                          |           |        |
| D1 negative psychosocial work stress factor | 1.36                                     | 1.18-1.57 | <0.001 |
| D2 positive psychosocial work stress factor | 0.97                                     | 0.93-1.00 | 0.037  |
| Model2                                      |                                          |           |        |
| D1 negative psychosocial work stress factor | 1.43                                     | 1.23-1.67 | <0.001 |
| D2 positive psychosocial work stress factor | 0.97                                     | 0.94-1.01 | 0.155  |
| Model3                                      |                                          |           |        |
| D1 negative psychosocial work stress factor | 1.46                                     | 1.25-1.70 | <0.001 |
| D2 positive psychosocial work stress factor | 0.98                                     | 0.95-1.02 | 0.325  |

Noted: OR: Odds Ratio. Model1: Unadjusted. Model2: Adjusted by age and gender. Model3: Adjusted by age, gender, education level, occupation, physical exercise, drinking behavior, and smoking status.

2  
3  
4  
5  
6  
7  
8  
9

1 **Figure legends**

2  
3 **Figure 1** Standardized coefficients for modified second-order confirmatory factor analysis of COPSOQ (M2b). The structural  
4 model consisted of seven interrelated constructs, F1 refers to Demands at work; F2, Influence and development; F3, Interpersonal  
5 relations and leadership; F4, Insecurity at work; F5, Job satisfaction; D1, negative psychosocial work stress factor; D2, positive  
6 psychosocial work stress factor. The observed variables, unobserved variables and measurement error were represented as  
7 rectangles, ellipses and circles respectively. The arrow between the unobserved variable and the observed variable represented a  
8 regression path and its number represented the standardized regression weight. The arrow between a small circle and the observed  
9 variable represented a measurement error term. The double-headed arrows represented the correlation between two unobserved  
10 variables (factor covariances) of the model. Confirmatory factor analysis (CFA) results indicated good to adequate model fit:  
11  $\chi^2=1664.67$ ; degrees of freedom (df) =508;  $\chi^2/df =3.28$ ; Comparative Fit Index (CFI) =0.918; Root Mean Square Error of  
Approximation (RMSEA) =0.053; Standardized Root Mean Square Residual (SRMR) =0.066.

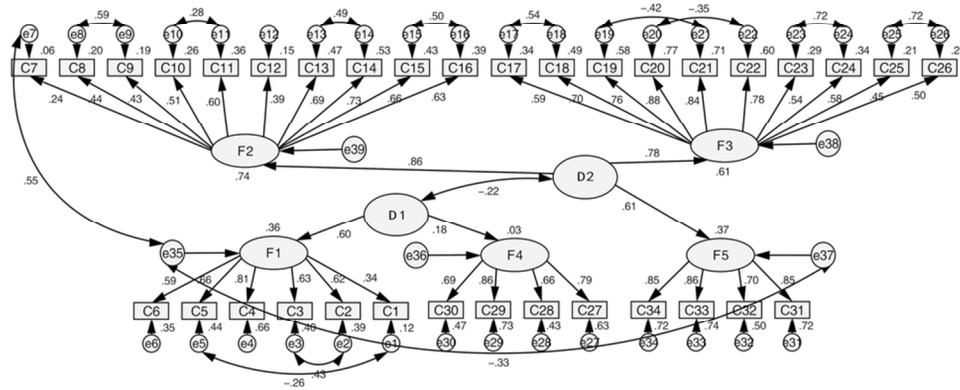

Figure 1 Standardized coefficients for modified second-order confirmatory factor analysis of COPSOQ (M2b). The structural model consisted of seven interrelated constructs, F1 refers to Demands at work; F2, Influence and development; F3, Interpersonal relations and leadership; F4, Insecurity at work; F5, Job satisfaction; D1, negative psychosocial work stress factor; D2, positive psychosocial work stress factor. The observed variables, unobserved variables and measurement error were represented as rectangles, ellipses and circles respectively. The arrow between the unobserved variable and the observed variable represented a regression path and its number represented the standardized regression weight. The arrow between a small circle and the observed variable represented a measurement error term. The double-headed arrows represented the correlation between two unobserved variables (factor covariances) of the model. Confirmatory factor analysis (CFA) results indicated good to adequate model fit:  $\chi^2=1664.67$ ; degrees of freedom (df) =508;  $\chi^2/df =3.28$ ; Comparative Fit Index (CFI) =0.918; Root Mean Square Error of Approximation (RMSEA) =0.053; Standardized Root Mean Square Residual (SRMR) =0.066.

85x42mm (300 x 300 DPI)

**Table S1.** COPSOQ questions used in stress-related psychosocial work factors survey

| Demands at work:                        |                                                                                                                                    | never/hardly ever | occasionally | often | very often | always |
|-----------------------------------------|------------------------------------------------------------------------------------------------------------------------------------|-------------------|--------------|-------|------------|--------|
| C1                                      | Do you have to work very fast?                                                                                                     |                   |              |       |            |        |
| C2                                      | Is your workload unevenly distributed, so that it piles up?                                                                        |                   |              |       |            |        |
| C3                                      | How often do you not have time to complete all your work tasks?                                                                    |                   |              |       |            |        |
| C4                                      | Does your work put you in emotionally disturbing situations?                                                                       |                   |              |       |            |        |
| C5                                      | Do you get emotionally involved in your work?                                                                                      |                   |              |       |            |        |
| C6                                      | Does your work require that you hide your feelings?                                                                                |                   |              |       |            |        |
| Influence and development:              |                                                                                                                                    | never/hardly ever | occasionally | often | very often | always |
| C7                                      | Do you have a large degree of influence on the decisions concerning your work?                                                     |                   |              |       |            |        |
| C8                                      | Can you influence the amount of work assigned to you?                                                                              |                   |              |       |            |        |
| C9                                      | Do you have any influence on what you do at work?                                                                                  |                   |              |       |            |        |
| C10                                     | Can you play a leading role in the work?                                                                                           |                   |              |       |            |        |
| C11                                     | Do you have the possibility of learning new things through your work?                                                              |                   |              |       |            |        |
| C12                                     | Can you decide when to take a break?                                                                                               |                   |              |       |            |        |
| C13                                     | Is your work meaningful?                                                                                                           |                   |              |       |            |        |
| C14                                     | Do you feel that the work you do is important?                                                                                     |                   |              |       |            |        |
| C15                                     | Would you like to stay at your current place of work for the rest of your worklife?                                                |                   |              |       |            |        |
| C16                                     | Do you think your work is extremely important to yourself?                                                                         |                   |              |       |            |        |
| Interpersonal relations and leadership: |                                                                                                                                    | never/hardly ever | occasionally | often | very often | always |
| C17                                     | At your place of work, are you informed well in advance about, for example, important decisions, changes, or plans for the future? |                   |              |       |            |        |
| C18                                     | Do you receive all the information that you need in order to do your work well?                                                    |                   |              |       |            |        |
| C19                                     | How often do you get help and support from your colleagues?                                                                        |                   |              |       |            |        |
| C20                                     | How often do you get help and support from your nearest superior?                                                                  |                   |              |       |            |        |
| C21                                     | How often do you talk with your superior about how well you carry out                                                              |                   |              |       |            |        |

|    |     |                                                                                             |                        |                   |         |                   |                        |
|----|-----|---------------------------------------------------------------------------------------------|------------------------|-------------------|---------|-------------------|------------------------|
| 1  |     | your work?                                                                                  |                        |                   |         |                   |                        |
| 2  |     |                                                                                             |                        |                   |         |                   |                        |
| 3  | C22 | How often do you talk with your colleagues about how well you carry                         |                        |                   |         |                   |                        |
| 4  |     | out your work?                                                                              |                        |                   |         |                   |                        |
| 5  |     |                                                                                             |                        |                   |         |                   |                        |
| 6  | C23 | Is there good co-operation between your colleagues at work?                                 |                        |                   |         |                   |                        |
| 7  |     |                                                                                             |                        |                   |         |                   |                        |
| 8  | C24 | Do you feel you are part of work team?                                                      |                        |                   |         |                   |                        |
| 9  |     |                                                                                             |                        |                   |         |                   |                        |
| 10 |     |                                                                                             |                        |                   |         |                   |                        |
| 11 |     | Quality of leadership                                                                       | to a very small extent | to a small extent | general | to a large extent | to a very large extent |
| 12 |     |                                                                                             |                        |                   |         |                   |                        |
| 13 | C25 | Is your immediate superior                                                                  |                        |                   |         |                   |                        |
| 14 |     | good at work-planning?                                                                      |                        |                   |         |                   |                        |
| 15 |     |                                                                                             |                        |                   |         |                   |                        |
| 16 | C26 | Is your immediate superior                                                                  |                        |                   |         |                   |                        |
| 17 |     | good at solving conflicts?                                                                  |                        |                   |         |                   |                        |
| 18 |     |                                                                                             |                        |                   |         |                   |                        |
| 19 |     |                                                                                             |                        |                   |         |                   |                        |
| 20 |     |                                                                                             |                        |                   |         |                   |                        |
| 21 |     |                                                                                             |                        |                   |         |                   |                        |
| 22 |     | Job insecurity                                                                              |                        |                   |         | No                | Yes                    |
| 23 |     |                                                                                             |                        |                   |         |                   |                        |
| 24 | C27 | Are you worried about becoming unemployed?                                                  |                        |                   |         |                   |                        |
| 25 |     |                                                                                             |                        |                   |         |                   |                        |
| 26 | C28 | Do you worry about that new technology making you / your work redundant?                    |                        |                   |         |                   |                        |
| 27 |     |                                                                                             |                        |                   |         |                   |                        |
| 28 | C29 | Are you worried about being difficult for you to find another job if you became unemployed? |                        |                   |         |                   |                        |
| 29 |     |                                                                                             |                        |                   |         |                   |                        |
| 30 | C30 | Are you worried about being transferred to another job against your will?                   |                        |                   |         |                   |                        |
| 31 |     |                                                                                             |                        |                   |         |                   |                        |
| 32 |     |                                                                                             |                        |                   |         |                   |                        |
| 33 |     | Job satisfaction                                                                            | strongly dissatisfied  | dissatisfied      | general | satisfied         | strongly satisfied     |
| 34 |     |                                                                                             |                        |                   |         |                   |                        |
| 35 | C31 | Are you satisfied with your job prospects?                                                  |                        |                   |         |                   |                        |
| 36 |     |                                                                                             |                        |                   |         |                   |                        |
| 37 | C32 | Are you satisfied with the hardware facilities in your                                      |                        |                   |         |                   |                        |
| 38 |     | work place?                                                                                 |                        |                   |         |                   |                        |
| 39 |     |                                                                                             |                        |                   |         |                   |                        |
| 40 | C33 | Are you satisfied with the way you play an ability at                                       |                        |                   |         |                   |                        |
| 41 |     | your work?                                                                                  |                        |                   |         |                   |                        |
| 42 |     |                                                                                             |                        |                   |         |                   |                        |
| 43 | C34 | Taken together, are you satisfied with your work?                                           |                        |                   |         |                   |                        |
| 44 |     |                                                                                             |                        |                   |         |                   |                        |
| 45 |     |                                                                                             |                        |                   |         |                   |                        |
| 46 |     |                                                                                             |                        |                   |         |                   |                        |
| 47 |     |                                                                                             |                        |                   |         |                   |                        |
| 48 |     |                                                                                             |                        |                   |         |                   |                        |
| 49 |     |                                                                                             |                        |                   |         |                   |                        |
| 50 |     |                                                                                             |                        |                   |         |                   |                        |
| 51 |     |                                                                                             |                        |                   |         |                   |                        |
| 52 |     |                                                                                             |                        |                   |         |                   |                        |
| 53 |     |                                                                                             |                        |                   |         |                   |                        |
| 54 |     |                                                                                             |                        |                   |         |                   |                        |
| 55 |     |                                                                                             |                        |                   |         |                   |                        |
| 56 |     |                                                                                             |                        |                   |         |                   |                        |
| 57 |     |                                                                                             |                        |                   |         |                   |                        |
| 58 |     |                                                                                             |                        |                   |         |                   |                        |
| 59 |     |                                                                                             |                        |                   |         |                   |                        |
| 60 |     |                                                                                             |                        |                   |         |                   |                        |



**Table S2.** SHSQ-25 score distribution in survey sample

| SHSQ-25 score | <i>n</i> | %     | Cumulative % |
|---------------|----------|-------|--------------|
| 0-10          | 52.0     | 6.5   | 6.5          |
| 10-20         | 128.0    | 16.1  | 22.6         |
| 20-30         | 180.0    | 22.6  | 45.2         |
| 30-40         | 182.0    | 22.8  | 68.0         |
| 40-50         | 140.0    | 17.6  | 85.6         |
| 50-60         | 71.0     | 8.9   | 94.5         |
| 60-70         | 32.0     | 4.0   | 98.5         |
| 70-80         | 8.0      | 1.0   | 99.5         |
| 80-90         | 4.0      | 0.5   | 100.0        |
| Total         | 797      | 100.0 |              |

**Table S3.** Sensitivity analyses of participant according suboptimal health status

| Demographics                | Total<br>(N=797) | SHSQ-25 (P75) |            |        | SHSQ-25 (P90) |           |        |
|-----------------------------|------------------|---------------|------------|--------|---------------|-----------|--------|
|                             | n (%)            | Non-SHS       | SHS        | P      | Non-SHS       | SHS       | P      |
| <b>Age group(years)</b>     |                  |               |            | <0.001 |               |           | 0.005  |
| 40~                         | 270 (33.9)       | 188 (30.9)    | 82 (43.4)  |        | 234 (32.2)    | 36 (50.7) |        |
| 45~                         | 245 (30.7)       | 188 (30.9)    | 57 (30.2)  |        | 228 (31.4)    | 17 (23.9) |        |
| 55~68                       | 282 (35.4)       | 232 (38.2)    | 50 (26.5)  |        | 264 (36.40)   | 18 (25.4) |        |
| <b>Gender</b>               |                  |               |            | <0.001 |               |           | <0.001 |
| Male                        | 243 (30.5)       | 213 (35.0)    | 30 (15.9)  |        | 239 (32.9)    | 4 (5.6)   |        |
| Female                      | 554 (69.5)       | 395 (65.0)    | 159 (84.1) |        | 487 (67.1)    | 67 (94.4) |        |
| <b>Education level</b>      |                  |               |            | 0.004  |               |           | 0.007  |
| High school and below       | 122 (15.3)       | 970 (16.0)    | 25 (13.2)  |        | 109 (15.0)    | 13 (18.3) |        |
| Junior college              | 321 (40.3)       | 225 (37.0)    | 96 (50.8)  |        | 284 (39.1)    | 37 (52.1) |        |
| University                  | 182 (22.8)       | 142 (23.4)    | 40 (21.2)  |        | 167 (23.0)    | 15 (21.1) |        |
| Graduate students and above | 172 (21.6)       | 144 (23.7)    | 28 (14.8)  |        | 166 (22.9)    | 6 (8.5)   |        |
| <b>occupation</b>           |                  |               |            | <0.001 |               |           | <0.001 |
| Nurses                      | 188 (23.6)       | 117 (19.2)    | 71 (37.6)  |        | 151 (20.8)    | 37 (52.1) |        |
| Medical technicians         | 187 (23.5)       | 137 (22.5)    | 50 (26.5)  |        | 168 (23.1)    | 19 (26.8) |        |
| Doctors                     | 208 (26.1)       | 173 (28.5)    | 35 (18.5)  |        | 201 (27.7)    | 7 (9.9)   |        |
| Others                      | 214 (26.9)       | 181 (29.8)    | 33 (17.5)  |        | 206 (28.4)    | 8 (11.3)  |        |
| <b>Physical exercise</b>    |                  |               |            | 0.012  |               |           | 0.045  |
| Yes                         | 363 (45.5)       | 292 (48.0)    | 71 (37.6)  |        | 339 (46.7)    | 24 (33.8) |        |
| No                          | 434 (54.5)       | 316 (52.0)    | 118 (62.4) |        | 387 (53.3)    | 47 (66.2) |        |
| <b>Smoking</b>              |                  |               |            | <0.001 |               |           | 0.002  |
| Yes                         | 93 (11.7)        | 87 (14.3)     | 6 (3.2)    |        | 92 (12.7)     | 1 (1.4)   |        |
| No/Quit                     | 704 (88.3)       | 521 (85.7)    | 183 (96.8) |        | 634 (87.3)    | 70 (98.6) |        |
| <b>Drinking</b>             |                  |               |            | 0.001  |               |           | 0.014  |
| Yes                         | 166 (20.8)       | 142 (23.4)    | 24 (12.7)  |        | 159 (21.9)    | 7 (9.9)   |        |
| No/Abstained                | 631 (79.2)       | 466 (76.6)    | 165 (87.3) |        | 567 (78.1)    | 64 (90.1) |        |
| <b>Night shift</b>          |                  |               |            | 0.800  |               |           | 0.801  |
| Yes                         | 331 (41.5)       | 251 (41.3)    | 80 (42.3)  |        | 303 (41.7)    | 28 (39.4) |        |
| No                          | 466 (58.5)       | 357 (58.7)    | 109 (57.7) |        | 423 (58.3)    | 43 (60.6) |        |
| <b>Weekly working hours</b> |                  |               |            | 0.022  |               |           | 0.067  |
| ≤40 hours                   | 270 (33.9)       | 219 (36.0)    | 51 (27.0)  |        | 253 (34.8)    | 17 (23.9) |        |
| >40 hours                   | 527 (66.1)       | 389 (64.0)    | 138 (73.0) |        | 473 (65.2)    | 54 (76.1) |        |

Noted: \*, P<0.01.

**Table S4.** Test of internal consistency and interfactor correlations of the COPSOQ

| Factor (Cronbach's $\alpha$ )                    | N of Items | F <sub>1</sub> | F <sub>2</sub> | F <sub>3</sub> | F <sub>4</sub> | F <sub>5</sub> |
|--------------------------------------------------|------------|----------------|----------------|----------------|----------------|----------------|
| F <sub>1</sub> Demands (0.791)                   | 6          | 1              | —              | —              | —              | —              |
| F <sub>2</sub> Influence and development (0.820) | 10         | -0.067         | 1              | —              | —              | —              |
| F <sub>3</sub> Relation and leadership (0.891)   | 10         | -0.094*        | 0.606**        | 1              | —              | —              |
| F <sub>4</sub> Insecurity at work (0.830)        | 4          | 0.037**        | 0.002          | -0.004         | 1              | —              |
| F <sub>5</sub> Job satisfaction (0.881)          | 4          | -0.214**       | 0.306**        | 0.366**        | -0.027**       | 1              |

r correlation \* $p < 0.05$ ; \*\* $p < 0.01$

For peer review only

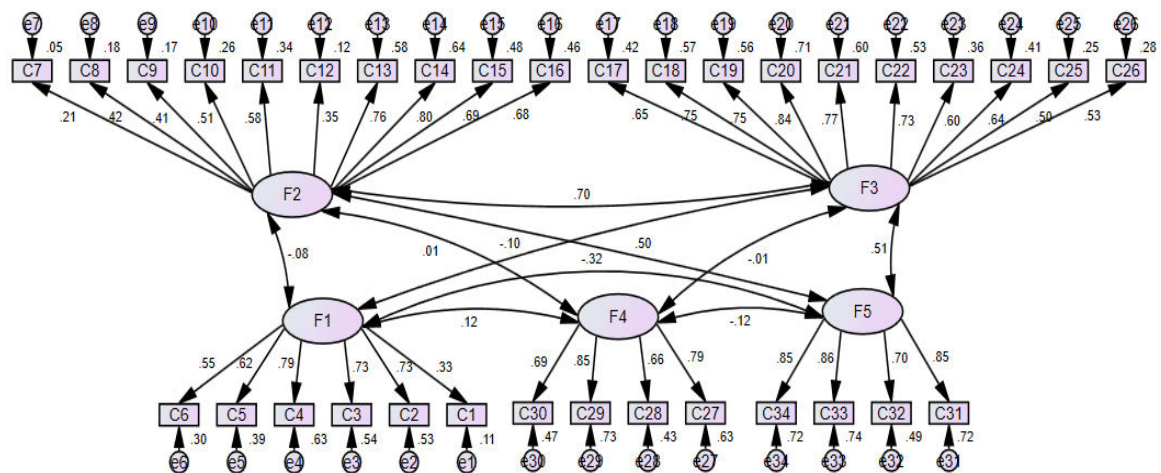

**Figure S1** Standardized coefficients for initial first-order confirmatory factor analysis of COPSOQ (M1a). The structural model consisted of five interrelated constructs, including F1 refers to Demands at work; F2, Influence and development; F3, Interpersonal relations and leadership; F4, Insecurity at work; F5, Job satisfaction. The observed variables, unobserved variables and measurement error were represented as rectangles, ellipses and circles respectively. The arrow between the unobserved variable and the observed variable represented a regression path and its number represented the standardized regression weight. The arrow between a small circle and the observed variable represented a measurement error term. The double-headed arrows represented the correlation between two unobserved variables (factor covariances) of the model. Confirmatory factor analysis (CFA) results didn't indicate good to adequate model fit:  $\chi^2=4216.39$ ; degrees of freedom (df) =517;  $\chi^2/df =8.16$ ; Comparative Fit Index (CFI) =0.737; Root Mean Square Error of Approximation (RMSEA) =0.095; Standardized Root Mean Square Residual (SRMR) =0.080.

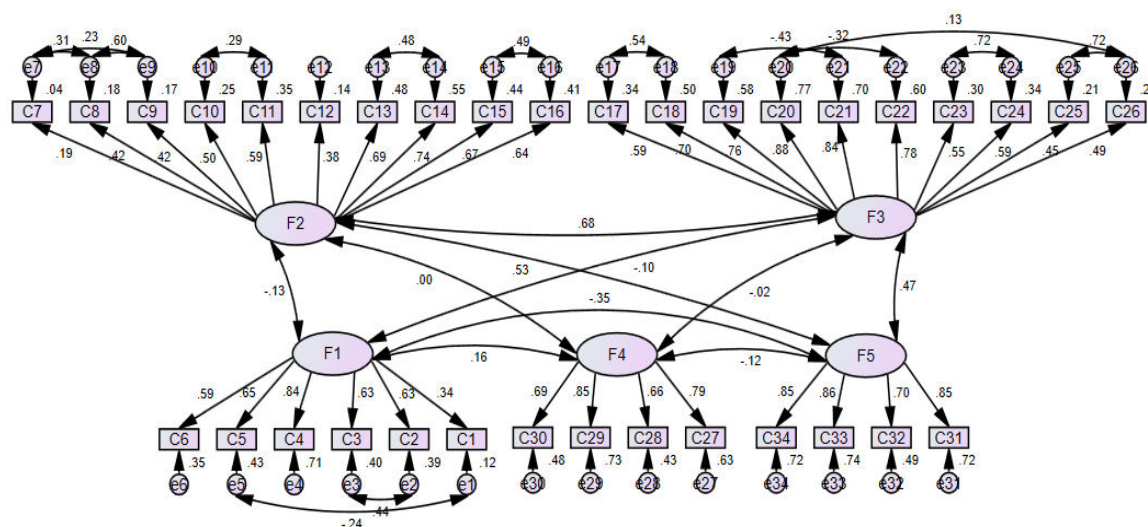

**Figure S2** Standardized coefficients for modified first-order confirmatory factor analysis of COPSOQ (M1b). The structural model consisted of five interrelated constructs, F1 refers to Demands at work; F2, Influence and development; F3, Interpersonal relations and leadership; F4, Insecurity at work; F5, Job satisfaction. The observed variables, unobserved variables and measurement error were represented as rectangles, ellipses and circles respectively. The arrow between the unobserved variable and the observed variable represented a regression path and its number represented the standardized regression weight. The arrow between a small circle and the observed variable represented a measurement error term. The double-headed arrows represented the correlation between two unobserved variables (factor covariances) of the model. Confirmatory factor analysis (CFA) results indicated good to adequate model fit:  $\chi^2=1699.40$ ; degrees of freedom ( $df$ )=503;  $\chi^2/df=3.40$ ; Comparative Fit Index (CFI)=0.915; Root Mean Square Error of Approximation (RMSEA)=0.055; Standardized Root Mean Square Residual(SRMR)=0.070.

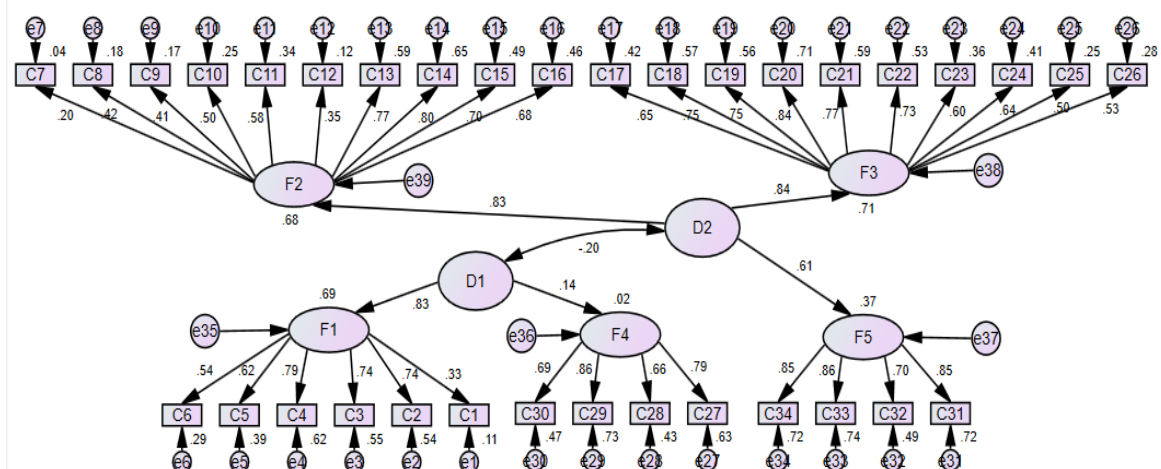

**Figure S3** Standardized coefficients for initial second-order confirmatory factor analysis of COPSOQ (M2a). The structural model consisted of seven interrelated constructs, F1 refers to Demands at work; F2, Influence and development; F3, Interpersonal relations and leadership; F4, Insecurity at work; F5, Job satisfaction; D1, negative psychosocial work stress factor; D2, positive psychosocial work stress factor. The observed variables, unobserved variables and measurement error were represented as rectangles, ellipses and circles respectively. The arrow between the unobserved variable and the observed variable represented a regression path and its number represented the standardized regression weight. The arrow between a small circle and the observed variable represented a measurement error term. The double-headed arrows represented the correlation between two unobserved variables (factor covariances) of the model. Confirmatory factor analysis (CFA) results didn't indicate good to adequate model fit:  $\chi^2=4276.30$ ; degrees of freedom ( $df$ ) =521;  $\chi^2/df=8.21$ ; Comparative Fit Index (CFI) =0.733; Root Mean Square Error of Approximation (RMSEA) =0.095; Standardized Root Mean Square Residual (SRMR) =0.085.

**STROBE 2007 (v4) Statement—Checklist of items that should be included in reports of *cross-sectional studies***

| Section/Topic                | Item # | Recommendation                                                                                                                                                                       | Reported on page # |
|------------------------------|--------|--------------------------------------------------------------------------------------------------------------------------------------------------------------------------------------|--------------------|
| <b>Title and abstract</b>    | 1      | (a) Indicate the study's design with a commonly used term in the title or the abstract                                                                                               | 1, 2               |
|                              |        | (b) Provide in the abstract an informative and balanced summary of what was done and what was found                                                                                  | 2                  |
| <b>Introduction</b>          |        |                                                                                                                                                                                      |                    |
| Background/rationale         | 2      | Explain the scientific background and rationale for the investigation being reported                                                                                                 | 4                  |
| Objectives                   | 3      | State specific objectives, including any prespecified hypotheses                                                                                                                     | 5                  |
| <b>Methods</b>               |        |                                                                                                                                                                                      |                    |
| Study design                 | 4      | Present key elements of study design early in the paper                                                                                                                              | 5                  |
| Setting                      | 5      | Describe the setting, locations, and relevant dates, including periods of recruitment, exposure, follow-up, and data collection                                                      | 5, 6               |
| Participants                 | 6      | (a) Give the eligibility criteria, and the sources and methods of selection of participants                                                                                          | 5                  |
| Variables                    | 7      | Clearly define all outcomes, exposures, predictors, potential confounders, and effect modifiers. Give diagnostic criteria, if applicable                                             | 5, 6               |
| Data sources/<br>measurement | 8*     | For each variable of interest, give sources of data and details of methods of assessment (measurement). Describe comparability of assessment methods if there is more than one group | 5, 6               |
| Bias                         | 9      | Describe any efforts to address potential sources of bias                                                                                                                            | 7                  |
| Study size                   | 10     | Explain how the study size was arrived at                                                                                                                                            | 5                  |
| Quantitative variables       | 11     | Explain how quantitative variables were handled in the analyses. If applicable, describe which groupings were chosen and why                                                         | 7                  |
| Statistical methods          | 12     | (a) Describe all statistical methods, including those used to control for confounding                                                                                                | 7                  |
|                              |        | (b) Describe any methods used to examine subgroups and interactions                                                                                                                  | 7                  |
|                              |        | (c) Explain how missing data were addressed                                                                                                                                          | 7                  |
|                              |        | (d) If applicable, describe analytical methods taking account of sampling strategy                                                                                                   | N                  |
|                              |        | (e) Describe any sensitivity analyses                                                                                                                                                | 7                  |
| <b>Results</b>               |        |                                                                                                                                                                                      |                    |

|                          |     |                                                                                                                                                                                                              |                                       |
|--------------------------|-----|--------------------------------------------------------------------------------------------------------------------------------------------------------------------------------------------------------------|---------------------------------------|
| Participants             | 13* | (a) Report numbers of individuals at each stage of study—eg numbers potentially eligible, examined for eligibility, confirmed eligible, included in the study, completing follow-up, and analysed            | 8                                     |
|                          |     | (b) Give reasons for non-participation at each stage                                                                                                                                                         | 7                                     |
|                          |     | (c) Consider use of a flow diagram                                                                                                                                                                           | N                                     |
| Descriptive data         | 14* | (a) Give characteristics of study participants (eg demographic, clinical, social) and information on exposures and potential confounders                                                                     | Table 1 and 3                         |
|                          |     | (b) Indicate number of participants with missing data for each variable of interest                                                                                                                          | N                                     |
| Outcome data             | 15* | Report numbers of outcome events or summary measures                                                                                                                                                         | Online summary table S2, Table3       |
| Main results             | 16  | (a) Give unadjusted estimates and, if applicable, confounder-adjusted estimates and their precision (eg, 95% confidence interval). Make clear which confounders were adjusted for and why they were included | Page 11 and Table4                    |
|                          |     | (b) Report category boundaries when continuous variables were categorized                                                                                                                                    | 7                                     |
|                          |     | (c) If relevant, consider translating estimates of relative risk into absolute risk for a meaningful time period                                                                                             | N                                     |
| Other analyses           | 17  | Report other analyses done—eg analyses of subgroups and interactions, and sensitivity analyses                                                                                                               | 8-11, Table4, Online summary table S3 |
| <b>Discussion</b>        |     |                                                                                                                                                                                                              |                                       |
| Key results              | 18  | Summarise key results with reference to study objectives                                                                                                                                                     | 11                                    |
| Limitations              | 19  | Discuss limitations of the study, taking into account sources of potential bias or imprecision. Discuss both direction and magnitude of any potential bias                                                   | 3                                     |
| Interpretation           | 20  | Give a cautious overall interpretation of results considering objectives, limitations, multiplicity of analyses, results from similar studies, and other relevant evidence                                   | 12, 13                                |
| Generalisability         | 21  | Discuss the generalisability (external validity) of the study results                                                                                                                                        | 3                                     |
| <b>Other information</b> |     |                                                                                                                                                                                                              |                                       |
| Funding                  | 22  | Give the source of funding and the role of the funders for the present study and, if applicable, for the original study on which the present article is based                                                | 19                                    |

\*Give information separately for cases and controls in case-control studies and, if applicable, for exposed and unexposed groups in cohort and cross-sectional studies.

**Note:** An Explanation and Elaboration article discusses each checklist item and gives methodological background and published examples of transparent reporting. The STROBE checklist is best used in conjunction with this article (freely available on the Web sites of PLoS Medicine at <http://www.plosmedicine.org/>, Annals of Internal Medicine at <http://www.annals.org/>, and Epidemiology at <http://www.epidem.com/>). Information on the STROBE Initiative is available at [www.strobe-statement.org](http://www.strobe-statement.org).



# BMJ Open

## The relationship between stress-related psychosocial work factors and suboptimal health among Chinese medical staff: a cross-sectional study

|                                 |                                                                                                                                                                                                                                                                                                                                                                                                                                                                                                                                                                                                                                                                                                                                                                                                                                                                                 |
|---------------------------------|---------------------------------------------------------------------------------------------------------------------------------------------------------------------------------------------------------------------------------------------------------------------------------------------------------------------------------------------------------------------------------------------------------------------------------------------------------------------------------------------------------------------------------------------------------------------------------------------------------------------------------------------------------------------------------------------------------------------------------------------------------------------------------------------------------------------------------------------------------------------------------|
| Journal:                        | <i>BMJ Open</i>                                                                                                                                                                                                                                                                                                                                                                                                                                                                                                                                                                                                                                                                                                                                                                                                                                                                 |
| Manuscript ID                   | bmjopen-2017-018485.R2                                                                                                                                                                                                                                                                                                                                                                                                                                                                                                                                                                                                                                                                                                                                                                                                                                                          |
| Article Type:                   | Research                                                                                                                                                                                                                                                                                                                                                                                                                                                                                                                                                                                                                                                                                                                                                                                                                                                                        |
| Date Submitted by the Author:   | 10-Jan-2018                                                                                                                                                                                                                                                                                                                                                                                                                                                                                                                                                                                                                                                                                                                                                                                                                                                                     |
| Complete List of Authors:       | Liang, Yingzhi; Capital Medical University, Department of Epidemiology and Biostatistics, School of Public Health; Municipal Key Laboratory of Clinical Epidemiology<br>Chu, Xi; Xuanwu Hospital, Capital Medical University, Health Management Center<br>Meng, Shijiao; Tiantan Hospital, Capital Medical University, Department of Education<br>Zhang, Jie; Capital Medical University, Department of Epidemiology and Biostatistics, School of Public Health; Municipal Key Laboratory of Clinical Epidemiology<br>Wu, Lijuan; Capital Medical University, Department of Epidemiology and Biostatistics, School of Public Health; Municipal Key Laboratory of Clinical Epidemiology<br>Yan, Yuxiang; Capital Medical University, Department of Epidemiology and Biostatistics; Capital Medical University, Municipal Key Laboratory of Clinical Epidemiology, Beijing, China |
| <b>Primary Subject Heading</b>: | Mental health                                                                                                                                                                                                                                                                                                                                                                                                                                                                                                                                                                                                                                                                                                                                                                                                                                                                   |
| Secondary Subject Heading:      | Epidemiology, Occupational and environmental medicine, Research methods                                                                                                                                                                                                                                                                                                                                                                                                                                                                                                                                                                                                                                                                                                                                                                                                         |
| Keywords:                       | Psychosocial Stress, Suboptimal Health, Medical Staff, Confirmative Factor Analysis                                                                                                                                                                                                                                                                                                                                                                                                                                                                                                                                                                                                                                                                                                                                                                                             |
|                                 |                                                                                                                                                                                                                                                                                                                                                                                                                                                                                                                                                                                                                                                                                                                                                                                                                                                                                 |

SCHOLARONE™  
Manuscripts

# The relationship between stress-related psychosocial work factors and suboptimal health among Chinese medical staff: a cross-sectional study

Yingzhi Liang<sup>1,2,†</sup>, Xi Chu<sup>3,†</sup>, Shijiao Meng<sup>4</sup>, Jie Zhang<sup>1,2</sup>, Lijuan Wu<sup>1,2</sup> and Yuxiang Yan<sup>1,2,\*</sup>

<sup>1</sup> Department of Epidemiology and Biostatistics, School of Public Health, Capital Medical University, Beijing, China

<sup>2</sup> Municipal Key Laboratory of Clinical Epidemiology, Beijing, China

<sup>3</sup> Health Management Center, Xuanwu Hospital, Capital Medical University, Beijing, China

<sup>4</sup> Department of Education, Tiantan Hospital, Capital Medical University, Beijing, China

† These two authors contributed equally to the article.

\* Corresponding author

Address: Department of Epidemiology and Biostatistics, School of Public Health, Capital Medical University, No.10 Xitoutiao, You An Men, Beijing, 100069 P.R.China.

Email: [yanyxepi@ccmu.edu.cn](mailto:yanyxepi@ccmu.edu.cn)

1     **Abstract**

2  
3  
4     **Objectives** To develop and validate a model to measure psychosocial factors at work among medical staff in China based on  
5  
6     confirmatory factor analysis. The second aim of the current study was to clarify the association between stress-related  
7  
8     psychosocial work factors and suboptimal health status.

9  
10  
11     **Design** The cross-sectional study was conducted by clustered sampling method.

12  
13  
14     **Setting** Xuanwu Hospital, a 3A Grade Hospital, in Beijing province.

15  
16  
17     **Participants** nine hundred and fourteen medical staff aged over 40 years were sampled. Seven hundred and ninety-seven valid  
18  
19     questionnaires were collected and used for further analysis. The sample included 94% of the Han population.

20  
21  
22     **Main outcome measures** The Copenhagen Psychosocial Questionnaire (COPSOQ) and Suboptimal Health Status  
23  
24     Questionnaires-25 (SHSQ-25) were used to assess the psychosocial factors at work and suboptimal health status, respectively.  
25  
26     Confirmative Factor Analysis (CFA) was conducted to establish the evaluating method of COPSOQ. A multivariate logistic  
27  
28     regression model was used to estimate the relationship between suboptimal health status and stress-related psychosocial work  
29  
30     factors among Chinese medical staff.

31  
32  
33     **Results** There was strong correlation among the five dimensions of COPSOQ based on the first-order factor model. Then, we  
34  
35     established two second-order factors including negative and positive psychosocial work stress factor to evaluate psychosocial  
36  
37     factors at work and the second-order factor model fit well. The high score of negative ( $OR$  (95%  $CI$ ) = 1.47 (1.34 to 1.62),  
38  
39      $P < 0.001$ ) and positive psychosocial work factor ( $OR$  (95%  $CI$ ) = 0.96 (0.94 to 0.98),  $P < 0.001$ ) increased and decreased the risk of  
40  
41     suboptimal health, respectively. This relationship remained statistically significant after adjusting for confounders and when using  
42  
43     different cut-offs of SHS.

44  
45  
46     **Conclusions** Among medical staff, the second-order factor model was a suitable method to evaluate the COPSOQ. The negative  
47  
48     and positive psychosocial work stress factor might be the risk and protective factor of suboptimal health, respectively. Moreover,  
49  
50     negative psychosocial work stress was the most associated factor to predict suboptimal health.

1 This is an Open Access article distributed in accordance with the Creative Commons Attribution Non Commercial (CC BY-NC  
2  
3 4.0) license, which permits others to distribute, remix, adapt, build upon this work non-commercially, and license their derivative  
4  
5 works on different terms, provided the original work is properly cited and the use is non-commercial. See:  
6  
7  
8 <http://creativecommons.org/licenses/by-nc/4.0/>  
9  
10  
11  
12  
13  
14  
15  
16  
17  
18

### Strengths and limitations of this study

- The study had high internal validity, with a good representation of medical staff.
- To assessment psychosocial factors at work among medical staff, a more parsimonious, modified second-factor model was finally built to replace the traditional method of calculating the average value of the COPSOQ which ignored the effect of each item.
- The study was conducted in Beijing (a dense city), adding evidence on these issues in a different context than the current literature.
- Although the sample was representative of the diversity of medical staff in one geographical area of the China, the data are not nationally representative and ethnic minority groups are particularly under-represented.
- The study used a cross-sectional design, which is not well suited to assess the direction of causation.

## 1. Introduction

Work is viewed as an important aspect of psychosocial stress and the impact of psychosocial work conditions on workers' health has been well documented over the past decades. There is accumulating evidence indicating an association between a harsh working environment and a wide range of diseases including mental disorders [1-2], diabetes [3] and cardiovascular disease [4-6] among workers. So far, several theories have been established that predicted various consequences for the health of workers when exposed to certain psychosocial risk factors at work [7]. Seven influential theories are the job characteristics model, the Michigan organizational stress model, the demand-control-(support) model, the sociotechnical approach, the action-theoretical approach, the effort-reward-imbalance model, and the vitamin model [8]. The Copenhagen Psychosocial Questionnaire (COPSOQ) is a comprehensive and generic instrument based on the integration of the common elements of seven kinds of pattern and development some of the original entry (such as work content) at the same time for the assessment of psychosocial factors at work. Exposure to workplace psychosocial risk factors varies according to the types of occupation and job role. Teachers, firefighters and hospital workers have been reported to experience higher level of work-related stress than average level [9-10].

Due to demographic changes, the number of old people and the incidence of chronic diseases are rising in China. Meanwhile, dealing with chronic diseases, incurable or dying patients are emotionally demanding [11]. In addition, there are rapid enhancements on treatment options and therapeutic strategies due to medical advances. These changes may lead to an increased workload and high quantitative demands for Chinese medical staff at hospital. Recent studies have been demonstrated that the prevalence of burnout and stress is relatively high among medical staff [12-13]. Stress fatigue and burnout further have a detrimental influence on the physicians' quality of life and may result in early retirement or reduced quality of patient care and negatively affects health-care systems [14-15]. What is more, studies have shown that medical staff is at increased risk for ill-health, including musculoskeletal disorders [16] and mental health problems [17], caused by adverse workplace factors. Consequently, we need to pay attention to the psychosocial work characteristics of medical staff.

Since the ancient time, traditional Chinese medicine has been identifying a physical status between health and disease which we coined as suboptimal health status (SHS) [18]. SHS is characterized by functional somatic syndromes or symptoms that are medically undiagnosed. Nowadays, much attention has been paid on perceived poor health "somatization" and "medically

1 unexplained symptoms” in community and primary care system located in developed countries [19-20]. Undoubtedly, SHS is  
2  
3 becoming a global issue. Recent studies ever reported that 60% of students [21] and 50-60% of occupational population [22-23]  
4  
5 suffered from suboptimal health in China. Unfortunately, impaired quality of life, frequent hospital visits and incurrence of  
6  
7 significant medical expenses were often accompanied with SHS [24]. Our previous studies have showed that SHS may contribute  
8  
9 to the progression or development of chronic diseases, such as cardiovascular disease [25]. Although the aforementioned study has  
10  
11 demonstrated the prevalence of SHS and its consequences, few studies that have addressed the issue of stress-related psychosocial  
12  
13 work factors and suboptimal health among medical staff in China. This study aimed to evaluate the impact of stress-related  
14  
15 psychosocial work factors on suboptimal health status and their associations.  
16  
17  
18  
19  
20  
21

## 22 **2. Participants and Methods**

### 23 **2.1 Ethics Statement**

24  
25 Approval was obtained from the Research Ethics Committee of Capital Medical University prior to the initiation of this project.  
26  
27  
28 All study participants provided written informed consent prior to enrollment in the study.  
29  
30  
31  
32

### 33 **2.2 Participants**

34  
35 This cross-sectional study was conducted by clustered sampling method. The current analysis included 914 medical staff from  
36  
37 Xuanwu Hospital who participated in the 2014 annual health medical examination (including physicians, nurses, medical  
38  
39 technicians, management staff, et al.). All participants of this study were older than 40 years of age. The data were collected  
40  
41 through questionnaires of Suboptimal Health Status Questionnaires-25 (SHSQ-25) and Copenhagen Psychosocial Questionnaire  
42  
43 (COPSOQ). The subjects were divided into ‘SHS’ and ‘non-SHS’ group by the score of SHSQ-25.  
44  
45  
46  
47  
48

### 49 **2.3 Instruments**

#### 50 **2.3.1 Copenhagen Psychosocial Questionnaire**

51  
52 The Copenhagen Psychosocial Questionnaire (COPSOQ) is a comprehensive and generic instrument for the assessment of  
53  
54 psychosocial factors at work. The Chinese translation and adaptation of COPSOQ had been tested in the population with different  
55  
56  
57  
58  
59  
60

1 professions, which had been shown good reliability and validity, with Cronbach's alpha coefficients of 0.7 for most scales [26-27].  
2  
3 2 This instrument includes three versions: a long version for research use, a medium-length version to be used by work environment  
4  
5 3 professionals, and a short version for workplaces. Our study was based on the short Chinese version of COPSOQ, which consists  
6  
7 of 44 questions forming 8 scales. We selected 34 questions including 5 dimensions from a short version of COPSOQ with namely  
8  
9 'Demands at work', 'Influence and development', 'Interpersonal relations and leadership', 'Insecurity at work' and 'Job  
10  
11 satisfaction' to assess psychosocial factors at work for stress [8]. In this survey, the remaining three health-related dimensions,  
12  
13 including 'general health', 'mental health' and 'vitality', in the original short version of COPSOQ were not used. For most of the  
14  
15 7 questions, we used either intensity (from "to a very small extent" to "to a very large extent") or frequency (from "never/hardly  
16  
17 ever" to "always"). All items of COPSOQ were transformed on a value range from 0 to 100 points with 0 representing the lowest  
18  
19 degree of the measured psychosocial factor 'never/hardly ever' or 'to a very small extent', and 100 representing the highest  
20  
21 'always' or 'to a very large extent' (online supplementary table S1). In most scales, a high score was considered desirable. On the  
22  
23 10 contrary, a low score was considered desirable for 'Demands at work' and 'Insecurity at work'.  
24  
25 11 As a default generic method, the average scores for each dimension of COPSOQ were calculated and compared. But this method  
26  
27 12 ignored the relationship between each item and corresponding dimension. To explore the association among each dimension of  
28  
29 COPSOQ, we conducted confirmative factor analysis (CFA) [28] which could estimate the relationship between each latent  
30  
31 13 variable (i.e. each dimension of COPSOQ) and between observed variables (i.e. items of dimensions) and corresponding latent  
32  
33 14 variable as well.  
34  
35 15  
36  
37  
38  
39  
40  
41  
42

### 43 18 **2.3.2 Suboptimal Health Status Questionnaires-25**

44  
45  
46 19 Prior to survey, participants had attended a hospital annual health examination, comprising a medical history, physical  
47  
48 20 examination, blood biochemical examination, routine urinalysis, rest ECG, chest radiography and so on. According to medical  
49  
50 history and physical examination results, participants diagnosed with clinical diseases by associate chief physician or more  
51  
52 professional clinical doctors were excluded. Then, the SHS of the other participants was measured by the suboptimal health status  
53  
54 22 questionnaire (SHSQ-25) [18] including 25 items and encompassed five subscales: fatigue, the cardiovascular system, the  
55  
56 23 digestive tract, the immune system and mental status. The SHSQ-25 is short and easy to be completed, and therefore, suitable for  
57  
58 24  
59

1 use in general population and primary care service [23]. Each individual was asked to rate a specific statement on a 5-point  
2  
3 Likert-type scale based on how often they suffered various specific complaints in the preceding 3 months: never/ hardly ever,  
4  
5 occasionally, often, very often, and always. The scores on the questionnaire were coded as 0 to 4. SHS scores ranged from 0 to  
6  
7 100 were calculated for each respondent by summing the ratings for the 25 items. A high score represents a high level of SHS  
8  
9 (poor health).  
10  
11  
12  
13 There are no cut-off scores. The sample did not have high levels of suboptimal health (online supplementary table S2); therefore,  
14  
15  
16 for an easier interpretation, participants with a SHSQ-25 score higher than 31 (median of the total sample) were classified as  
17  
18 'SHS', and those equal or lower than 31 were classified as 'non-SHS'. The sensitivity of our results to this choice was examined  
19  
20 further in sensitivity analyses by classifying the respondents with SHSQ-25 scores in the 75th percentile (P75) and above (a score  
21  
22 higher than 43) and in the 90th percentile (P90) and above (a score of 53 and above) as SHS and all others as non-SHS.  
23  
24  
25

## 26 2.4 Statistical analysis

27  
28  
29 Descriptive statistics were used to describe the overall population. Univariate analyses were used to compare variations in  
30  
31 demographic characteristics among medical staff with different suboptimal health status; for Binary and categorical variable,  
32  
33 chi-square test was used, ordinal variable was analyzed by *Kolmogorov-Smirnov Z* test. For nonparametric data, *Mann-Whitney U*  
34  
35 test was used to assess stress-related working factors among medical staff with different health status. Demographic missing data  
36  
37 were coded as missing and excluded from relevant analysis. A Cronbach's alpha of >0.70 is considered to be an acceptable  
38  
39 reliability coefficient for determining the internal consistency of the scale [29]. Model testing was conducted by confirmatory  
40  
41 factor analysis (CFA) and structural equation modeling (SEM) analyses. To assess global fit of the model by total sample, we  
42  
43 calculated five goodness-of-fit indices. They were  $\chi^2$  and its subsequent ratio with degrees of freedom ( $\chi^2/df$ ), adjusted  
44  
45 goodness-of-fit index (AGFI), comparative fit index (CFI), standard root mean square residual (SRMR) and root mean square  
46  
47 error of approximation (RMSEA). Evaluation standards were described in previous literature [30-32]. The first-order factor model  
48  
49 was used to analyze the correlation among the five dimensions of COPSOQ. And, the second-order factor model was to establish  
50  
51 the evaluating method of COPSOQ for comparing psychosocial work characteristics among medical staff. A multivariate logistic  
52  
53 regression model was used to estimate the relationship between suboptimal health status and psychosocial factors at work.  
54  
55  
56  
57  
58  
59  
60



1 1 Potential confounders including age, gender, education level, occupation, physical exercise, drinking behavior, and smoking status  
2  
3 2 were adjusted. The two-tailed  $P < 0.05$  was considered to be statistically significant. The statistical packages SPSS 22.0 (Chicago,  
4  
5 3 Illinois) and AMOS 22.0 (Chicago, Illinois) were used for statistical analysis.  
6  
7  
8

### 9 4 **3. Results**

#### 10 5 **3.1 Baseline Characteristics**

11  
12  
13 6 Among 914 of the medical staff participated in 2014 annual health medical examination 797 eligible questionnaires were retrieved,  
14  
15  
16 7 with the retrieval rate of 87.20%. The mean age was approximately 50, More than half of the participants were female (n=554,  
17  
18  
19 8 69.5%). Table 1 showed the descriptive analyses of participants according to suboptimal health status. The differences in age,  
20  
21  
22 9 gender, education level, occupation and the status of physical exercise, smoking and drinking between individuals with and  
23  
24  
25 10 without SHS were statistically significant (All  $P < 0.05$ , Table 1). In sensitivity analyses of participant according suboptimal health  
26  
27  
28 11 status (P75 and P90) reported the same results. Moreover, compared with non-SHS individuals, SHS individuals were statistically  
29  
30  
31 12 significantly ( $P < 0.05$ ) more likely to be longer weekly working hours when using P75 as a SHS cut-off (online supplementary  
32  
33  
34 13 table S3). There were 396 (49.7%) individuals considered as SHS based on the score of SHSQ-25 (median). Among 396  
35  
36 14 suboptimal health individuals, 80.6 % was female, nearly half (48.2%) with the highest record of formal schooling was junior  
37  
38  
39 15 college, 31.8 % careered in nursing, 59.8 % was without the habit of physical exercise and mostly (>80%) didn't smoking and  
40  
41 16 drinking (Table 1). This advantage in the proportion of corresponding variables above still existed and became more obvious in  
42  
43  
44 17 sensitivity analyses (online supplementary table S3).  
45

#### 46 18 **3.2 Reliability**

47  
48 19 The COPSOQ showed a very high overall internal consistency with Cronbach's alpha of 0.849 for the total scale (Items 1-34). The  
49  
50  
51 20 internal consistency characteristics of COPSOQ showed good reliability. The Cronbach's alpha about five dimensions were among  
52  
53 21 0.791 to 0.891 (online supplementary table S4).  
54  
55  
56

#### 57 22 **3.3 Confirmatory factor analysis**

1 We performed confirmatory factor analysis (CFA) based on the five theoretical dimensions of COPSOQ. Parameters were  
2  
3 2 estimated for the CFA model based on the maximum likelihood procedure involving fitting the variances and covariances among  
4  
5 3 observed scores. AMOS therefore created a covariance matrix, including the variances and covariances among observed scores.  
6  
7  
8 4 The next step was to illustrate the observed (items) and unobserved (factors) in the hypothesized model (see online supplementary  
9  
10 5 figure S1). The goodness of fit index was unacceptable in M1a (Table 2). After modification according to modification index [33],  
11  
12 6 the modified first-order factor model (M1b, see online supplementary figure S2) for COPSOQ had adequate fit of the model to the  
13  
14  
15 7 data (Table 2). However, Pearson correlations between first-order factors in M1b model showed that most of the first order factors  
16  
17 8 correlated with each other (online supplementary table S4). These results supported the notion that the COPSOQ was comprised  
18  
19 9 of five factors subsumed under one or two higher order factors. Based on the theoretical model of COPSOQ, high scores of F1  
20  
21 10 (Demands at work) and F4 (Insecurity at work) means susceptible to work strain. Conversely, high scores of F2 (Influence and  
22  
23 11 development), F3 (Interpersonal relations and leadership) and F5 (Job satisfaction) may protect people from work strain [26].  
24  
25  
26  
27 12 According to the theory, the second-order factor model of COPSOQ might be tested. We next conducted CFA to formally test the  
28  
29 13 fit of our hypothesized, second-order factor model (M2a) of COPSOQ. This model, depicted in online supplementary figure S3,  
30  
31 14 didn't have good overall model fit (Table 2). This suggested M2a need further modification. M2a was modified (Figure 1) and the  
32  
33 15 fit of the modified second-order model (M2b) was acceptable (Table 2).  
34  
35  
36  
37 16 The overall fit of modified factor first-order model (M1b) and modified second-order factor model (M2b) were similar. Thus, we  
38  
39 17 further compared these two models. As a result, a  $\chi^2$  difference test revealed that modified second-order factor model was  
40  
41 18 significantly better than modified factor first-order model ( $\Delta\chi^2=34.73$ ,  $P<0.05$ ), which suggested that the more parsimonious,  
42  
43 19 modified second-factor model (M2b) would be favored for COPSOQ. In M2b, D1 which referred to negative psychosocial work  
44  
45 20 factor included two first-order factors (F1 Demands at work and F4 insecurity at work). And, D2 positive psychosocial work  
46  
47 21 factor was composed by the rest three first-order factors (Influence and development, Interpersonal relations and leadership and  
48  
49 22 Job satisfaction). All standardized factor coefficients of this model were significant ( $P<0.05$ , Figure 1). But, the relationship  
50  
51 23 between insecurity at work and D1 negative psychosocial work factor was not significant ( $r=0.18$ ,  $P>0.355$ , Figure 1). Thus,  
52  
53 24 demand at work was the largest contributor to the negative psychosocial work stress in current study.  
54  
55  
56  
57  
58  
59  
60

### 3.4 The assessment of stress-related psychosocial work factors among medical staff with different individual and work characteristics

We used the two second-order factors (D1 negative psychosocial work stress factor and D2 positive psychosocial work stress factor) to assess the psychosocial work factors among medical staff. The factors score was calculated by standardized regression coefficients. In structural equation modeling, the standardized regression coefficients, also called standardized factor loadings, actually are the correlation coefficients between indicators and its latent variables. The form of standardized factor scores of the  $i$ th factor in first-order model is:

$$ZF_i = \sum_j b_{ij} (ZC_j - \overline{ZC}_j)$$

Where  $b_{ij}$  are standardized regression weights,  $ZC_j$  is the standardized scores of the  $j$ th questionnaire item,  $\overline{ZC}_j$  is average standardized scores.  $i = 1,2,3,4,5$ ,  $j = 1,2,3,4,5,6,7,8,9,10$ ;

The form of standardized factor scores of the  $i$ th factor in first-order model is:

$$S = \sum W_i (ZF_i - \overline{ZF}_i)$$

Where  $W_i$  are standardized regression weights,  $ZF_i$  is the standardized scores of the  $i$ th latent variable,  $\overline{ZF}_i$  is average standardized scores of 5 latent variable.  $i = 1,2,3,4,5$ .

Based on the above 2 formulas, we can get the score of D1 (negative psychosocial work factor) and D2 (positive psychosocial work factor) among medical staff. The two factors score did not meet the normal distribution assumptions, were conducted using the *Mann-Whitney U* non-parametric test by ranks. Table 1 showed the score of stress-related psychosocial work factors based on different individual and work characteristics. The score of negative psychosocial work stress factor was significantly different among medical staff with different age, education level, occupation, physical exercise, night shift and weekly working hours ( $P < 0.05$ ). While, the difference between men and women was not significant ( $P = 0.292$ ). In the other hand, the score of positive psychosocial work stress factor was significantly different among medical staff with different age, gender, occupation and the status of physical exercise, smoking and drinking ( $P < 0.05$ ). Then, we explored the score of psychosocial work stress factors between individuals with and without SHS, results shown in Table 3. The scores of negative and positive psychosocial factor were

1 significantly different between SHS and non-SHS group ( $P<0.05$ ). Briefly, the individuals with SHS were likely to get higher  
2 score of negative psychosocial work factor and lower score of positive psychosocial work factor, respectively. This difference  
3 stayed statistically significant when using SHS cut-offs of either P75 or P90 (Table 3).

### 4 **3.5 The relationship between stress-related psychosocial work factors and suboptimal health (P50, P75 and P90)**

5 Multivariate stepwise logistic regression models showed a statistically significant inverse relationship between positive  
6 psychosocial work stress factor and suboptimal health, and a positive relationship between negative psychosocial work stress  
7 factor and suboptimal health. Regarding negative psychosocial factor in the total sample, those who got higher score of negative  
8 psychosocial work stress factor had higher risk of being suboptimal than low-score individuals (model1:  $OR$  (95%  $CI$ )=1.47 (1.34  
9 to 1.62),  $P<0.001$ ). This relationship remained statistically significant in the adjusted models (model2:  $OR$  (95%  $CI$ )=1.50 (1.36 to  
10 1.66),  $P<0.001$ ; model3:  $OR$  (95%  $CI$ )=1.57 (1.42 to 1.75),  $P<0.01$ ) (Table 4) and when using SHS cut-offs of either P75 or P90.  
11 Considering the total sample, individuals with higher score of positive psychosocial work stress factor had a lower risk of being  
12 suboptimal health compared with those who got lower score (model1:  $OR$  (95%  $CI$ ) = 0.96 (0.94 to 0.98),  $P<0.001$ ). This  
13 relationship remained statistically significant in the adjusted models (model2:  $OR$  (95%  $CI$ ) = 0.97 (0.95 to 0.99),  $P=0.003$ ;  
14 model3:  $OR$  (95%  $CI$ ) = 0.97 (0.95 to 0.99),  $P=0.012$ ) and in the majority of SHS sensitivity analyses (using cut-offs of P75 and  
15 P90), with the exception of the first-step adjusted and fully adjusted models using P90 as a SHS cut-off (model2:  $OR$  (95%  $CI$ ) =  
16 0.97 (0.94 to 1.01),  $P=0.155$ ; model2:  $OR$  (95%  $CI$ ) = 0.98 (0.95 to 1.02),  $P=0.325$ ).

## 17 **4. Discussion**

18 As the development of social economy and the rapid pace of life, public have paid more and more attention to the importance of  
19 suboptimal health. SHS is regarded as a subclinical, reversible stage of chronic disease, which is characterized by a decline in  
20 vitality, in physiological function and in the capacity for adaptation within a period of three months [18]. For measurement of SHS,  
21 we developed SHSQ-25 and adopted it as an instrument in this study. SHSQ-25 has good internal consistency, which  
22 item-subscale correlations ranged from 0.51 to 0.72, with Cronbach's  $\alpha$  of 0.70 or higher for all subscales [23]. The good internal  
23 consistency (cronbach's  $\alpha$  of 0.943) was also verified in our study (not shown in our study). However, there were other SHS

1 questionnaires in China, such as Sub-Health Measurement Scale V1.0 (SHMS V1.0) and Multidimensional Subhealth  
2  
3 Questionnaire of Adolescents (MSQA). MSQA is aimed at adolescents. SHMS V1.0 is a 39-items questionnaire and includes  
4  
5 physiological, psychological and social dimensions. Previous research has shown SHMS V1.0 has good internal consistency in  
6  
7 population of Southern Chinese medical staff [34]. However, the SHSQ-25 was reliable and valid in a large sample health status  
8  
9 survey in Beijing [23]. On the other hand, the content and function of social symptoms dimension of SHMS V1.0 were repeated  
10  
11 with COPSOQ which used to assess the social-psychological factors at work in our study. In comparison, SHSQ-25 is shorter and  
12  
13 easier to complete, and therefore suitable for use in studies of the medical staff in our study. Multiple factors which were  
14  
15 influential to SHS, including gender, age, physical activities, dietary habits, emotional problems, social adaptation, etc. have been  
16  
17 found in recent studies [22, 25]. In corresponded, age, gender, education level, job, physical exercise, smoking and drinking were  
18  
19 significant factors that may influence the status of health among medical staff in current study. There was no internationally  
20  
21 accepted cutoff value to diagnose SHS. Thus, we further conducted a sensitivity analysis in which the results also valid. Overall,  
22  
23 the female nurses without the ways to relieve stress, such as habit of physical exercise, smoke and drink, were higher score of  
24  
25 SHSQ-25 (poorer health).  
26  
27  
28  
29  
30  
31  
32

33 Over the last 20 years, rare longitudinal and many cross-sectional studies have highlighted work organization conditions,  
34  
35 including repetitive work [35], decision authority [36], physical and emotional demands [37], irregular schedules and long hours  
36  
37 [38-39], and job insecurity [40] were the stress-related work factors to explain the emergence or aggravation of mental illness. In  
38  
39 addition, low job satisfaction that was also found to be important contributors to occupational stress in healthcare settings in  
40  
41 different studies [41-42]. The relation of mental work load and health status based on documented measuring instruments which  
42  
43 covered all important aspects was undisputedly increased. For enterprises and organizations, the COPSOQ questionnaire is a  
44  
45 qualified screening-instrument for psychosocial factors at work [43]. It has good internal consistency with Cronbach's  $\alpha$  of 0.79 or  
46  
47 even higher for all subscales in our study. But scale scores were computed as the average of the values of the single aspects, this  
48  
49 method ignored the relationship among each dimension. Previous studies [28] also showed the factor loadings calculated by  
50  
51 traditional factor analysis were less accurate and precise than that calculated by structural equation modeling, due to the traditional  
52  
53 method could not control the effects of other variables and caused message loss when extracting common factors. By contrast,  
54  
55  
56  
57  
58  
59  
60

1 structural equation modeling could get factor loadings both of indicators to first-order factors and first-order factors to second-order  
2 factors. The standardized regression coefficients estimated the relational degree between indicators and first-order factors,  
3 first-order factors and second-order factors under controlling other variables. The other difference with traditional method is that  
4 structural equation modeling allows measurement error of indicators.

5 Based on the above comparison and consideration, we conducted first- and second-order factor model to explore the association  
6 among dimensions of COPSOQ. In this study, a modified second-factor model with best fit indexes was considered to be favored  
7 for COPSOQ. Therefore, the stress-related psychosocial work factors of medical staff were assessed by modified second-order  
8 factor model (M2b). In M2b, the relationship between insecurity at work and negative psychosocial work factor was not  
9 significant. This result reflected subjects faced the risk of unemployment was very low in our study. It was accorded with the  
10 actual investigation in which subjects were on-the-job medical staff (older than 40 years of age) whose careers have "reached a  
11 stable position". The prevalence rate of SHS was 49.7% when using P50 as cutoff value in our study. Although they were low  
12 insecurity at work, they were in high risk of SHS because of the high pressure during the inservice.

13 The clinician as a kind of special population, they need possess highly concentrated attention, sensible thinking, exquisite  
14 techniques and experiences. Moreover, lasting work and intensive labor intensity make them suffer more stress than other medical  
15 specialties. Previous research suggested that psychosocial stress may result from gendered processes [44], such as uneven family  
16 responsibilities, gender-specific harassment or discrimination, and unequal levels of poverty which mainly limited the professional  
17 influence and development of female. In current study, the difference in the score of negative psychosocial work stress factor  
18 between men and women was not significant. But, women were lower score of positive psychosocial work stress factor than men  
19 ( $P<0.05$ ). In other word, women were more likely to suffer from stress-related psychosocial work factors than men. The gender  
20 gap in suboptimal health status in our study may be explained by the discriminatory impact of gender on the susceptible to  
21 stress-related psychosocial work factors and the individuals with high level of psychosocial work stress were high risk group of  
22 SHS. Additionally, age was also a significant factor affecting the stress levels [45-46]. Meanwhile, individuals with higher levels  
23 of education report greater psychological demands [47]. Similarly, we found older male nonclinical medical staff with habit of  
24 physical exercise, smoking and drinking reported higher score of positive psychosocial work factors (less susceptible to work

1 strain). While, younger clinical doctors with graduate degree or above who were lack of exercise, on night shift, and longer  
2 man-hour (longer than 40 hour per week) reported higher score of negative psychosocial work factor (more susceptible to work  
3 strain). In our study, psychosocial work stress factors, especially the negative side, was the mentioned factor influencing the risk  
4 of suboptimal health among medical staff. This relationship was also found in population of executive employees [48].

5 The results of this study provided some important insights for supervisors and managers in hospital. Positive effects of work in the  
6 medical services should be maximized. And the consequences of work-related risk factors, such as demands and insecurity at  
7 work, in this important profession, should be prevented. Moreover, Yan YX, et al [25] indicated that SHS is associated with  
8 cardiovascular risk factors and contributes to the development of cardiovascular disease. Therefore, it's less likely to be a question  
9 that the above measures are effective to prevent SHS, and further reduce the risks of cardiovascular disease.

## 10 **5. Conclusion**

11 The modified second-order factor model was a suitable method to evaluate COPSOQ among medical staff. In this population, the  
12 negative and positive psychosocial work stress factors might be the risk and protective factor of suboptimal health, respectively.  
13 Negative psychosocial work stress was the most associated factor to predict suboptimal health.

## 14 **Supplementary Materials**

15 Supplementary File 1. pdf

16 Supplementary File 2. pdf

## 17 **Acknowledgments**

18 The authors thank the staff at Xuanwu Hospital for their support. They also thank all participants in this study for their voluntary  
19 participation.

## 20 **References**

- 21 1. Chen SW. Job stress models, depressive disorders and work performance of engineers in microelectronics industry. *Int Arch*  
22 *Occup Environ Health* 2011; 84: 91–103. doi: 10.1007/s00420-010-0538-y

- 1 2. Grynderup MB, Mors O, Hansen AM, et al. Work-unit measures of organisational justice and risk of depression: a 2-year  
2 cohort study. *Occup Environ Med* 2013; 70: 380–385. doi: 10.1136/oemed-2012-101000
- 3 3. Pranita A, Balsubramaniyan B, Phadke AV, et al. Association of occupational & prediabetes statuses with obesity in middle  
4 aged women. *J Clin Diagn Res* 2013; 7: 1311–1313. doi: 10.7860/JCDR/2013/5466.3134
- 5 4. Du CL. Workplace justice and psychosocial work hazards in association with return to work in male workers with coronary  
6 heart diseases: a prospective study. *Int J Cardiol* 2013; 166: 745–747. doi: 10.1016/j.ijcard.2012.09.176
- 7 5. Park J, Kim Y, Cheng Y, et al. A comparison of the recognition of overwork-related cardiovascular disease in Japan, Korea,  
8 and Taiwan. *Ind Health* 2012; 50:17–23. doi: 10.2486/indhealth.MS1317
- 9 6. Belkic KL, Landsbergis PA, Schnall PL, et al. Is job strain a major source of cardiovascular disease risk? A systematic  
10 review on cohort studies. *Scand J Work Environ Health* 2004; 30: 85–128. doi:10.5271/sjweh.769
- 11 7. Fishta A, Backé EM. Psychosocial stress at work and cardiovascular diseases: an overview of systematic reviews. *Int Arch  
12 Occup Environ Health*. 2015; 88(8): 997-1014. doi: 10.1007/s00420-015-1019-0
- 13 8. Kristensen TS, Hannerz H, Høgh A, et al. The Copenhagen Psychosocial Questionnaire - a tool for the assessment and  
14 improvement of the psychosocial work environment. *Scand J Work Environ Health* 2005, 31: 438-449. doi: 10.5271/sjweh.  
15 948
- 16 9. Tsutsumi A, Kayaba K, Nagami M, et al. The effort-reward imbalance model: experience in Japanese working population. *J  
17 Occup Health* 2002; 44: 398–407. doi: 10.1539/joh.44.398
- 18 10. Johnson S, Cooper C, Cartwright S, et al. The experience of work related stress across occupations. *J Manag Psychol* 2005;  
19 20: 1–2. doi: 10.1108/02683940510579803
- 20 11. Wallace JE, Lemaire JB, Ghali WA. Physician wellness: A missing quality indicator. *Lancet* 2009; 374: 1714–21. doi:  
21 10.1016/S0140-6736(09)61424-0
- 22 12. Alacacioglu A, Yavuzsen T, Dirioz M, et al. Burnout in nurses and physicians working at an Oncology department.  
23 *Psychooncology* 2009; 18: 543–8. doi: 10.1002/pon.1432



- 1 13. Sehlen S, Vordermark D, Schäfer C, et al. Job stress and job satisfaction of physicians, radiographers, nurses and physicists  
2  
3 working in radiotherapy: A multicenter analysis by the DEGRO Quality of Life Work Group. *Radiat Oncol* 2009; 4: 6–15.  
4  
5 doi: 10.1186/1748-717X-4-6  
6  
7
- 8 14. Firth-Cozens J, Greenhalgh J. Doctors' perceptions of the links between stress and lowered clinical care. *Soc Sci Med* 1997;  
9  
10 44: 1017–22. doi: 10.1016/S0277-9536(96)00227-4  
11  
12
- 13 15. Fahrenkopf AM, Sectish TC, Barger LK, et al. Rates of medication errors among depressed and burnt out residents:  
14  
15 prospective cohort study. *BMJ* 2008; 336: 488–91. doi: 10.1136/bmj.39469.763218.BE  
16  
17
- 18 16. Alexopoulos EC, Burdorf A, Kalokerinou A. Risk factors for musculoskeletal disorders among nursing personnel in Greek  
19  
20 hospitals. *Int Arch Occup Environ Health* 2003; 76: 289–294. doi: 10.1007/s00420-003-0442-9  
21  
22
- 23 17. Rafnsdottir GL, Gunnarsdottir HK, Tomasson K. Work organization, well-being and health in geriatric care. *Work* 2004; 22:  
24  
25 49–55. PMID: 14757906  
26  
27
- 28 18. Wang W, Russell A, Yan YX. Traditional Chinese medicine and new concepts of predictive, preventive and personalized  
29  
30 medicine in diagnosis and treatment of suboptimal health. *EPMA J.* 2014; 5: 4. doi: 10.1186/1878-5085-5-4  
31  
32
- 33 19. Woolfolk RL, Allen LA. *Treating somatization: a cognitive-behavioural approach.* New York, NY: Guilford; 2007.  
34  
35
- 36 20. Brown RJ. Introduction to the special issue on medically unexplained symptoms: background and future directions. *Clin*  
37  
38 *Psychol Rev.* 2007; 27(7):769–780. doi: 10.1016/j.cpr.2007.07.003  
39  
40
- 41 21. Bi J, Huang Y, Xiao Y, et al. Association of lifestyle factors and suboptimal health status: a cross sectional study of Chinese  
42  
43 students. *BMJ Open* 2014; 4: e005156. doi: 10.1136/bmjopen-2014-005156  
44  
45
- 46 22. Wu S Xuan Z, Li F, et al. Work-Recreation Balance, Health-Promoting Lifestyles and Suboptimal Health Status in Southern  
47  
48 China: A Cross-Sectional Study. *Int J Environ Res Public Health* 2016; 13: 339-354. doi: 10.3390/ijerph13030339  
49  
50
- 51 23. Yan YX, Liu YQ, Li M, et al. Development and evaluation of a questionnaire for measuring suboptimal health status in urban  
52  
53 Chinese. *J Epidemiol* 2009; 19: 333–341. doi: 10.2188/jea.JE20080086  
54  
55
- 56  
57  
58  
59  
60

- 1 24. Joustra M.L., Janssens K.A., Bultmann U., Rosmalen J.G. Functional limitations in functional somatic syndromes and  
2  
3 well-defined medical diseases. Results from the general population cohort LifeLines. *J. Psychosom. Res.* 2015; 79: 94–99.  
4  
5 doi: 10.1016/j.jpsychores.2015.05.004  
6  
7
- 8 25. Yan YX, Do J, Liu YQ, et al. Association of suboptimal health status and cardiovascular risk factors in urban Chinese  
9  
10 workers. *J Urban Health* 2012; 89: 329–338. doi: 10.1007/s11524-011-9636-8  
11  
12
- 13 26. Shang L, Liu P, Fan LB, et al. Psychometric Properties of the Chinese Version of Copenhagen Psychosocial Questionnaire  
14  
15 [article in China]. *J Environ Occup Med* 2008; 25: 572-576.  
16  
17
- 18 27. Meng SJ, Yan YX, Liu YQ, et al. Reliability and validity of Copenhagen Psychosocial Questionnaire of Chinese [article in  
19  
20 China]. *Chin Prev Med* 2013; 14:12-15.  
21  
22
- 23 28. Babyak M, Green S. Confirmatory factor analysis: An introduction for psychometric medicine researchers. *Psychosomatic*  
24  
25 *Medicine* 2010; 72: 587-597. doi: 10.1097/PSY.0b013e3181de3f8a  
26  
27
- 28 29. Nunnally JC, Bernstein IH. *Psychometric theory*, 3rd Ed. McGraw-Hill, New York, London, 1994; pp.701.  
29  
30
- 31 30. Kline RB. Measurement models and confirmatory factor analysis. In *Principles and practice of structural equation modeling*,  
32  
33 3rd Ed. The Guilford Press: New York, London, 2005; pp. 230-51.  
34  
35
- 36 31. Hu LT, Bentler PM. Cutoff criteria for fit indexes in covariance structure analysis: conventional criteria versus new  
37  
38 alternatives. *Structural Equation Modeling* 1999; 6: 1-55. doi: 10.1080/10705519909540118  
39  
40
- 41 32. Tavakol S, Dennick R, Tavakol M. Psychometric properties and confirmatory factor analysis of the Jefferson Scale of  
42  
43 Physician Empathy. *BMC Med Educ* 2011; 11: 54-61. doi: 10.1186/1472-6920-11-54  
44  
45
- 46 33. Barbara MB. *Structural Equation Modeling With AMOS: Basic Concepts, Applications, and Programming*, 2nd Ed. Taylor &  
47  
48 Francis Group: New York, London, 2001; pp. 108-11.  
49  
50
- 51 34. Xu J, Feng LY, Luo R, Qiu JC, Zhang JH, Zhao XS, Lu Y, Wei Q. Assessment of the reliability and validity of the Sub-health  
52  
53 Measurement Scale Version1.0 [Article in Chinese]. *Nan Fang Yi Ke Da Xue Xue Bao.* 2011 Jan; 31(1):33-8. PMID:  
54  
55

- 1 1 21269952.
- 2
- 3
- 4 2 35. Shirom A, Westman M, Melamed S. The effects of pay systems on blue-collar employees' emotional distress: the mediating
- 5
- 6 3 effects of objective and subjective work monotony. *Human Relations* 1999; 52: 1077-1097. doi: 10.1023/A:1016935708825
- 7
- 8
- 9 4 36. Stansfeld SA, Fuhrer R, Shipley MJ, Marmot MG. Work characteristics predict psychiatric disorder: prospective results from
- 10
- 11 5 the Withehall II study. *Occupational and Environmental Medicine* 1999; 56: 302-307. PMID: 10472303
- 12
- 13
- 14 6 37. Bultmann U, Kant IJ, Van den Brandt PA, et al. Psychosocial work characteristics as risk factors for the onset of fatigue and
- 15
- 16 7 psychological distress: prospective results from the Maastricht Cohort Study. *Psychol Med* 2002; 32: 333-345. PMID:
- 17
- 18 8 11871373
- 19
- 20
- 21
- 22 9 38. Spurgeon A, Harrington JM, Cooper CL. Health and safety problems associated with long working hours: a review of the
- 23
- 24 10 current position. *Occupational and Environmental Medicine* 1997; 54: 367-375. PMID: 9245942
- 25
- 26
- 27
- 28 11 39. P. Bohle, J. Tilley. The impact of night work on psychological well-being *Ergonomics* 1989; 32: 1089-1099. doi:
- 29
- 30 12 10.1080/00140138908966876
- 31
- 32
- 33
- 34 13 40. Virtanen P, Janlert U, Hammarström A. Exposure to temporary employment and job insecurity: a longitudinal study of the
- 35
- 36 14 health effects. *Occup Environ Med* 2011; 68: 570-4. doi: 10.1136/oem.2010.054890
- 37
- 38
- 39 15 41. Fiabane E, Giorgi I, Musian D, Sguazzin C, Argentero P. Occupational stress and job satisfaction of healthcare staff in
- 40
- 41 16 rehabilitation units. *Med Lav.* 2012; 103 (6): 482-92. PMID: 23405482
- 42
- 43
- 44
- 45 17 42. Weinberg A, Creed F. Stress and psychiatric disorder in healthcare professionals and hospital staff. *Lancet.* 2000; 355 (9203):
- 46
- 47 18 533-7. doi: 10.1016/S0140-6736(99)07366-3
- 48
- 49
- 50 19 43. Nubling M, Stobel U, Hasselhom M, et al. Measuring psychological stress and strain at work: evaluation of the COPSOQ
- 51
- 52 20 Questionnaire in Germany. *GMS Psychosoc Med* 2006; 3: 1-14. PMID: 19742072
- 53
- 54
- 55
- 56 21 44. Springer KW, Mager Stellman J, Jordan-Young RM. Beyond a catalogue of differences: a theoretical frame and good
- 57
- 58 22 practice guidelines for researching sex/gender in human health. *Soc Sci Med* 2012; 74: 1817-1824. doi: 10.1016/j.
- 59
- 60

1 1 socscimed.2011.05.033

2  
3  
4 2 45. Choi ES, Ha Y. Work-related stress and risk factors among Korean employees. J Korean Acad Nurs 2009; 39: 549-61. doi:

5  
6 3 10.4040/jkan.2009.39.4.549

7  
8  
9 4 46. Purcell SR, Kutash M, Cobb S. The relationship between nurses' stress and nurse staffing factors in a hospital setting. J Nurs

10  
11 5 Manag 2011; 19: 714-20. doi: 10.1111/j.1365-2834.2011.01262.x

12  
13  
14 6 47. Landsbergis P, Grzywacz JG, LaMontage AD. Work Organization, job insecurity, and occupational health disparities. Am J

15  
16 7 Ind Med 2014; 57: 495-515. doi: 10.1002/ajim.22126

17  
18  
19 8 48. Hsu SH, Chen DR, Cheng Y, et al. Association of Psychosocial Work Hazards with Depression and Suboptimal Health in

20  
21 9 Executive Employees. JOEM 2016; 58:728-736. doi: 10.1097/JOM.0000000000000760

22  
23  
24  
25  
26 10

27  
28  
29 11

30  
31  
32 12

33  
34  
35 13

36  
37  
38 14

39  
40  
41 15

42  
43  
44 16

45  
46  
47 17

48  
49  
50 18

51  
52  
53 19

54  
55  
56 20

1     **Footnotes**

2  
3  
4     2     Yingzhi Liang and Xi Chu contributed equally to this work.  
5

6  
7     **Contributors**

8  
9  
10    4     Yuxiang Yan, lead and corresponding author, had full access to the data in the study and takes responsibility for the integrity of the  
11  
12    5     data and the accuracy of the data analysis. Yingzhi Liang wrote the majority of the manuscript, provided critical revisions to the  
13  
14    6     manuscript and aided substantially in the preparation of the revised submission. Xi Chu participated in study design, performed  
15  
16    7     data analysis and aided with interpretation. Shijiao Meng, Lijuan Wu and Jie Zhang collected and inputted questionnaires. All  
17  
18    8     authors read and approved the final manuscript.  
19  
20

21  
22  
23    **Funding**

24  
25  
26    10    This work was supported by the National Science Foundation (81573214), the Beijing Municipal Nature Science Foundation  
27  
28    11    (7162020), the Scientific Research Project of Beijing Municipal Educational Committee (KM201510025006), and the National  
29  
30    12    Key Research and Development Plan (2016YFC0900603).  
31  
32

33  
34    **Competing interests**

35  
36  
37    14    The authors declare that they have no competing interests.  
38  
39

40    **Ethics approval and consent to participate**

41  
42  
43    16    This study and associated protocols were conducted after approval by the Research Ethics Committee of Capital Medical  
44  
45    17    University. All research participants consented to having their anonymous data included in the analyses reported herein.  
46  
47

48    **Provenance and peer review**

49  
50  
51    19    Not commissioned; externally peer reviewed.  
52  
53

54    **Availability of data and materials**

55  
56  
57    21    The datasets used and/or analyzed during this study are available from the corresponding author on reasonable request.  
58  
59

**Table 1** Descriptive analyses of participants according to suboptimal health status and the stress-related psychosocial work factors as a total sample

| Demographics                | Total (N=797) | SHSQ-25 (P50) |            | Second-order factor of COPSOQ |                                             |         |                                             |         |
|-----------------------------|---------------|---------------|------------|-------------------------------|---------------------------------------------|---------|---------------------------------------------|---------|
|                             | n (%)         | Non-SHS       | SHS        | P                             | D1 negative psychosocial work stress factor | P       | D2 positive psychosocial work stress factor | P       |
| <b>Age group(years)</b>     |               |               |            | 0.005*                        |                                             | 0.003   |                                             | 0.007   |
| 40~                         | 270 (33.9)    | 118 (29.4)    | 152 (38.4) |                               | 0.21 ± 1.65<br>0.15 (-1.14, 1.32)           |         | -0.80 ± 7.00<br>0.15 (-5.52, 4.17)          |         |
| 45~                         | 245 (30.7)    | 126 (31.4)    | 119 (30.1) |                               | 0.07 ± 1.72<br>-0.1 (-1.28, 1.24)           |         | -0.29 ± 6.84<br>0.46 (-4.39, 4.76)          |         |
| 55~68                       | 282 (35.4)    | 157 (39.2)    | 125 (31.6) |                               | 0.26 ± 1.70<br>-0.47 (-1.55, 0.88)          |         | 1.01 ± 7.35<br>1.08 (-2.93, 6.78)           |         |
| <b>Gender</b>               |               |               |            | < 0.001                       |                                             | 0.292   |                                             | < 0.001 |
| Male                        | 243 (30.5)    | 166 (41.4)    | 77 (19.4)  |                               | -0.05 ± 1.88<br>-0.17 (-1.67, 1.20)         |         | 1.24 ± 7.29<br>1.54 (-3.33, 6.82)           |         |
| Female                      | 554 (69.5)    | 235 (58.6)    | 319 (80.6) |                               | 0.02 ± 1.62<br>-0.11 (-1.22, 1.14)          |         | -0.54 ± 6.96<br>0.24 (-5.02, 4.31)          |         |
| <b>Education level</b>      |               |               |            | 0.003*                        |                                             | < 0.001 |                                             | 0.111   |
| High school and below       | 122 (15.3)    | 65 (16.20)    | 57 (14.4)  |                               | -0.41 ± 1.81<br>-0.62 (-1.90, 0.64)         |         | 0.55 ± 7.79<br>1.19 (-3.74, 6.23)           |         |
| Junior college              | 321 (40.3)    | 130 (32.4)    | 191 (48.2) |                               | -0.07 ± 1.65<br>-0.21 (-1.39, 1.04)         |         | -0.78 ± 7.44<br>0.17 (-5.81, 4.35)          |         |
| University                  | 182 (22.8)    | 102 (25.4)    | 80 (20.2)  |                               | -0.15 ± 1.71<br>-0.37 (-1.52, 1.01)         |         | 0.62 ± 6.68<br>1.22 (-3.60, 5.47)           |         |
| Graduate students and above | 172 (21.6)    | 104 (25.9)    | 68 (17.2)  |                               | 0.57 ± 1.56<br>0.70 (-0.65, 1.63)           |         | 0.42 ± 6.30<br>0.66 (-4.28, 5.17)           |         |
| <b>Occupation</b>           |               |               |            | < 0.001                       |                                             | < 0.001 |                                             | 0.001   |
| Nurses                      | 188 (23.6)    | 62 (15.5)     | 126 (31.8) |                               | 0.22 ± 1.57<br>0.13 (-0.99, 1.16)           |         | -1.15 ± 7.35<br>-0.10 (-7.17, 4.10)         |         |
| Medical technicians         | 187 (23.5)    | 83 (20.7)     | 104 (26.3) |                               | -0.30 ± 1.59<br>-0.43 (-1.64, 1.02)         |         | -0.85 ± 6.75<br>-0.20 (-5.48, 3.46)         |         |
| Doctors                     | 208 (26.1)    | 125 (31.2)    | 83 (21.0)  |                               | 0.37 ± 1.72<br>0.31 (-0.93, 1.53)           |         | 0.70 ± 6.97<br>0.94 (-4.19, 6.67)           |         |
| Others                      | 214 (26.9)    | 131 (32.7)    | 83 (21.0)  |                               | -0.29 ± 1.78<br>-0.60 (-1.77, 0.89)         |         | 1.06 ± 7.13<br>1.44 (-2.78, 5.51)           |         |
| <b>Physical exercise</b>    |               |               |            | 0.003                         |                                             | 0.001   |                                             | 0.022   |
| Yes                         | 363 (45.5)    | 204 (50.9)    | 159 (40.2) |                               | -0.19 ± 1.76<br>-0.48 (-1.69, 1.14)         |         | 0.51 ± 7.30<br>1.12 (-4.27, 5.77)           |         |
| No                          | 434 (54.5)    | 197 (49.1)    | 237 (59.8) |                               | 0.16 ± 1.63<br>0.12 (-1.02, 1.18)           |         | -0.43 ± 6.92<br>0.33 (-5.03, 4.32)          |         |
| <b>Smoking</b>              |               |               |            | < 0.001                       |                                             | 0.082   |                                             | 0.013   |
| Yes                         | 93 (11.7)     | 63 (15.7)     | 30 (7.6)   |                               | -0.19 ± 2.04<br>-0.90 (-1.77, 1.16)         |         | 1.58 ± 7.80<br>2.16 (-3.16, 7.23)           |         |
| No/Quit                     | 704 (88.3)    | 338 (84.3)    | 366 (92.4) |                               | 0.02 ± 1.65<br>-0.09 (-1.28, 1.16)          |         | -0.21 ± 6.99<br>0.47 (-4.72, 4.78)          |         |
| <b>Drinking</b>             |               |               |            | < 0.001                       |                                             | 0.081   |                                             | 0.012   |
| Yes                         | 166 (20.8)    | 105 (26.2)    | 61 (15.4)  |                               | -0.18 ± 1.78<br>-0.66 (-1.56, 1.04)         |         | 1.18 ± 7.13<br>1.39 (-2.83, 6.72)           |         |
| No/Abstained                | 631 (79.2)    | 296 (73.8)    | 335 (84.6) |                               | 0.05 ± 1.68<br>-0.84 (-1.30, 1.16)          |         | -0.31 ± 7.07<br>0.37 (-4.93, 4.75)          |         |
| <b>Night shift</b>          |               |               |            | 0.774                         |                                             | < 0.001 |                                             | 0.445   |
| Yes                         | 331 (41.5)    | 169 (42.1)    | 162 (40.9) |                               | 0.27 ± 1.71<br>0.22 (-1.08, 1.36)           |         | -0.21 ± 7.04<br>0.46 (-4.42, 4.78)          |         |
| No                          | 466 (58.5)    | 232 (57.9)    | 234 (59.1) |                               | -0.19 ± 1.67<br>-0.39 (-1.53, 0.96)         |         | 0.15 ± 7.16<br>0.67 (-4.68, 5.22)           |         |
| <b>Weekly working hours</b> |               |               |            | 0.455                         |                                             | < 0.001 |                                             | 0.827   |
| ≤40 hours                   | 270 (33.9)    | 141 (35.2)    | 129 (32.6) |                               | -0.49 ± 1.60<br>-0.71 (-1.78, 0.56)         |         | 0.13 ± 6.92<br>0.57 (-4.45, 5.07)           |         |
| >40 hours                   | 527 (66.1)    | 260 (64.8)    | 267 (67.4) |                               | 0.25 ± 1.70<br>0.17 (-1.10, 1.43)           |         | -0.06 ± 7.21<br>0.70 (-4.62, 5.11)          |         |

Noted: \* analyzed by Kolmogorov-Smirnov Z test.

1

2

**Table 2** Goodness-of-fit indices for the different models

| Model | $\chi^2$ (df) | $\chi^2/df$ | CFI   | AGFI  | SRMR   | RMSEA |
|-------|---------------|-------------|-------|-------|--------|-------|
| M1a   | 4216.39(517)  | 8.16        | 0.737 | 0.708 | 0.0802 | 0.095 |
| M1b   | 1699.40(503)  | 3.40        | 0.915 | 0.864 | 0.0696 | 0.055 |
| M2a   | 4276.30(521)  | 8.21        | 0.733 | 0.707 | 0.0852 | 0.095 |
| M2b   | 1664.67(508)  | 3.28        | 0.918 | 0.866 | 0.0659 | 0.053 |

Noted: M1a: the first-order factor model; M1b: the modified first-order factor model; M2a: the second-order factor model; M2b: the modified second-order factor model.

Model fitting criteria were as followed: A CFI value of greater than 0.90 showed a psychometrically acceptable fit to the data; The value of AGFI ranged between 0 and 1, a value of 1 indicated a perfect fit; For the SRMR, values of 0.08 or lower represented good fit; The value of RMSEA should be below 0.06 to show good fit.

For peer review only

**Table 3.** The assessment of stress-related psychosocial work factors between individuals with and without SHS

| groups                         | Second-order factor of COPSOQ               |          |                                             |          |
|--------------------------------|---------------------------------------------|----------|---------------------------------------------|----------|
|                                | D1 negative psychosocial work stress factor | <i>P</i> | D2 positive psychosocial work stress factor | <i>P</i> |
| suboptimal health status (P50) |                                             | <0.001   |                                             | <0.001   |
| Non-SHS                        | -0.53 ± 1.60                                |          | 1.15 ± 6.97                                 |          |
|                                | -0.77 (-1.83, 0.54)                         |          | 1.61 (-2.79, 6.34)                          |          |
| SHS                            | 0.53 ± 1.63                                 |          | -1.16 ± 7.06                                |          |
|                                | 0.46 (-0.67, 1.60)                          |          | -0.57 (-5.75, 3.94)                         |          |
| suboptimal health status (P75) |                                             | <0.001   |                                             | <0.001   |
| Non-SHS                        | -0.24 ± 1.67                                |          | 0.71 ± 7.08                                 |          |
|                                | -0.39 (-1.62, 0.91)                         |          | 1.24 (-3.85, 5.69)                          |          |
| SHS                            | 0.77 ± 1.57                                 |          | -2.29 ± 6.73                                |          |
|                                | 0.70 (-0.44, 1.86)                          |          | -1.93 (-7.11, 2.60)                         |          |
| suboptimal health status (P90) |                                             | <0.001   |                                             | 0.005    |
| Non-SHS                        | -0.09 ± 1.68                                |          | 0.29 ± 7.13                                 |          |
|                                | -0.20 (-1.47, 1.08)                         |          | 0.78 (-4.39, 5.22)                          |          |
| SHS                            | 0.90 ± 1.68                                 |          | -2.14 ± 6.57                                |          |
|                                | 0.57 (-0.44, 2.19)                          |          | -1.93 (-7.23, 2.18)                         |          |

1  
2  
3  
4  
5  
6  
7  
8  
9  
10  
11  
12  
13  
14  
15  
16  
17  
18  
19  
20  
21  
22  
23  
24  
25  
26  
27  
28  
29  
30  
31  
32  
33  
34  
35  
36  
37  
38  
39  
40  
41  
42  
43  
44  
45  
46  
47  
48  
49  
50  
51  
52  
53  
54  
55  
56  
57  
58  
59  
60



**Table 4** Sensitivity analyses with multivariate models assessing the relationship between stress-related psychosocial work factors and suboptimal health (P50, P75 and P90)

| Model / variables                           | suboptimal health status (P50, P75, P90) |           |        |
|---------------------------------------------|------------------------------------------|-----------|--------|
|                                             | OR                                       | OR 95%CI  | P      |
| suboptimal health status (P50)              |                                          |           |        |
| Model1                                      |                                          |           |        |
| D1 negative psychosocial work stress factor | 1.47                                     | 1.34-1.62 | <0.001 |
| D2 positive psychosocial work stress factor | 0.96                                     | 0.94-0.98 | <0.001 |
| Model2                                      |                                          |           |        |
| D1 negative psychosocial work stress factor | 1.50                                     | 1.36-1.66 | <0.001 |
| D2 positive psychosocial work stress factor | 0.97                                     | 0.95-0.99 | 0.003  |
| Model3                                      |                                          |           |        |
| D1 negative psychosocial work stress factor | 1.57                                     | 1.42-1.75 | <0.001 |
| D2 positive psychosocial work stress factor | 0.97                                     | 0.95-0.99 | 0.012  |
| suboptimal health status (P75)              |                                          |           |        |
| Model1                                      |                                          |           |        |
| D1 negative psychosocial work stress factor | 1.39                                     | 1.26-1.54 | <0.001 |
| D2 positive psychosocial work stress factor | 0.95                                     | 0.93-0.97 | <0.001 |
| Model2                                      |                                          |           |        |
| D1 negative psychosocial work stress factor | 1.42                                     | 1.28-1.58 | <0.001 |
| D2 positive psychosocial work stress factor | 0.95                                     | 0.93-0.98 | <0.001 |
| Model3                                      |                                          |           |        |
| D1 negative psychosocial work stress factor | 1.44                                     | 1.29-1.61 | <0.001 |
| D2 positive psychosocial work stress factor | 0.96                                     | 0.93-0.98 | 0.001  |
| suboptimal health status (P90)              |                                          |           |        |
| Model1                                      |                                          |           |        |
| D1 negative psychosocial work stress factor | 1.36                                     | 1.18-1.57 | <0.001 |
| D2 positive psychosocial work stress factor | 0.97                                     | 0.93-1.00 | 0.037  |
| Model2                                      |                                          |           |        |
| D1 negative psychosocial work stress factor | 1.43                                     | 1.23-1.67 | <0.001 |
| D2 positive psychosocial work stress factor | 0.97                                     | 0.94-1.01 | 0.155  |
| Model3                                      |                                          |           |        |
| D1 negative psychosocial work stress factor | 1.46                                     | 1.25-1.70 | <0.001 |
| D2 positive psychosocial work stress factor | 0.98                                     | 0.95-1.02 | 0.325  |

Noted: OR: Odds Ratio. Model1: Unadjusted. Model2: Adjusted by age and gender. Model3: Adjusted by age, gender, education level, occupation, physical exercise, drinking behavior, and smoking status.

2  
3  
4  
5  
6  
7  
8  
9

1     **Figure legends**

2

3     **Figure 1** Standardized coefficients for modified second-order confirmatory factor analysis of COPSOQ (M2b). The structural

4

5     model consisted of seven interrelated constructs, F1 refers to Demands at work; F2, Influence and development; F3, Interpersonal

6

7     relations and leadership; F4, Insecurity at work; F5, Job satisfaction; D1, negative psychosocial work stress factor; D2, positive

8

9     psychosocial work stress factor. The observed variables, unobserved variables and measurement error were represented as

10

11    rectangles, ellipses and circles respectively. The arrow between the unobserved variable and the observed variable represented a

12

13    regression path and its number represented the standardized regression weight. The arrow between a small circle and the observed

14

15    variable represented a measurement error term. The double-headed arrows represented the correlation between two unobserved

16

17    variables (factor covariances) of the model. Confirmatory factor analysis (CFA) results indicated the goodness of fit index is fairly

18

19    good:  $\chi^2=1664.67$ ; degrees of freedom ( $df$ ) =508;  $\chi^2/df=3.28$ ; Comparative Fit Index (CFI) =0.918; Root Mean Square Error of

20

21    Approximation (RMSEA) =0.053; Standardized Root Mean Square Residual (SRMR) =0.066.

22

23

24

25

26

27

28

29

30

31

32

33

34

35

36

37

38

39

40

41

42

43

44

45

46

47

48

49

50

51

52

53

54

55

56

57

58

59

60

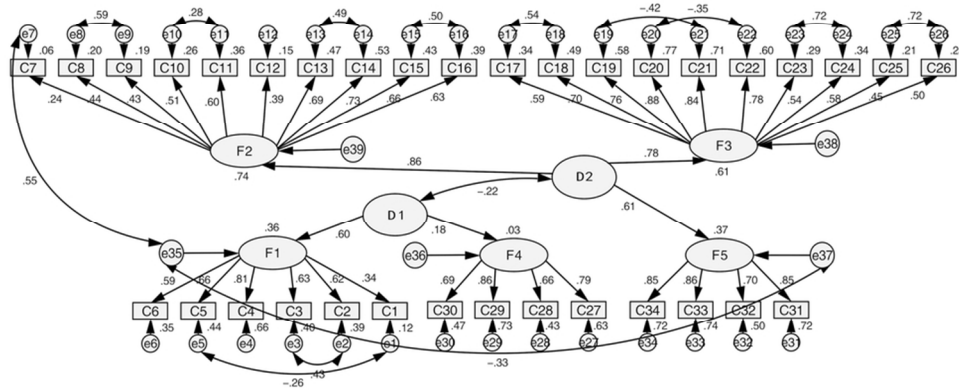

Figure 1 Standardized coefficients for modified second-order confirmatory factor analysis of COPSOQ (M2b). The structural model consisted of seven interrelated constructs, F1 refers to Demands at work; F2, Influence and development; F3, Interpersonal relations and leadership; F4, Insecurity at work; F5, Job satisfaction; D1, negative psychosocial work stress factor; D2, positive psychosocial work stress factor. The observed variables, unobserved variables and measurement error were represented as rectangles, ellipses and circles respectively. The arrow between the unobserved variable and the observed variable represented a regression path and its number represented the standardized regression weight. The arrow between a small circle and the observed variable represented a measurement error term. The double-headed arrows represented the correlation between two unobserved variables (factor covariances) of the model. Confirmatory factor analysis (CFA) results indicated good to adequate model fit:  $\chi^2=1664.67$ ; degrees of freedom (df) =508;  $\chi^2/df =3.28$ ; Comparative Fit Index (CFI) =0.918; Root Mean Square Error of Approximation (RMSEA) =0.053; Standardized Root Mean Square Residual (SRMR) =0.066.

85x42mm (300 x 300 DPI)

**Table S1.** COPSOQ questions used in stress-related psychosocial work factors survey

| Demands at work:                        |                                                                                                                                    | never/hardly ever | occasionally | often | very often | always |
|-----------------------------------------|------------------------------------------------------------------------------------------------------------------------------------|-------------------|--------------|-------|------------|--------|
| C1                                      | Do you have to work very fast?                                                                                                     |                   |              |       |            |        |
| C2                                      | Is your workload unevenly distributed, so that it piles up?                                                                        |                   |              |       |            |        |
| C3                                      | How often do you not have time to complete all your work tasks?                                                                    |                   |              |       |            |        |
| C4                                      | Does your work put you in emotionally disturbing situations?                                                                       |                   |              |       |            |        |
| C5                                      | Do you get emotionally involved in your work?                                                                                      |                   |              |       |            |        |
| C6                                      | Does your work require that you hide your feelings?                                                                                |                   |              |       |            |        |
| Influence and development:              |                                                                                                                                    | never/hardly ever | occasionally | often | very often | always |
| C7                                      | Do you have a large degree of influence on the decisions concerning your work?                                                     |                   |              |       |            |        |
| C8                                      | Can you influence the amount of work assigned to you?                                                                              |                   |              |       |            |        |
| C9                                      | Do you have any influence on what you do at work?                                                                                  |                   |              |       |            |        |
| C10                                     | Can you play a leading role in the work?                                                                                           |                   |              |       |            |        |
| C11                                     | Do you have the possibility of learning new things through your work?                                                              |                   |              |       |            |        |
| C12                                     | Can you decide when to take a break?                                                                                               |                   |              |       |            |        |
| C13                                     | Is your work meaningful?                                                                                                           |                   |              |       |            |        |
| C14                                     | Do you feel that the work you do is important?                                                                                     |                   |              |       |            |        |
| C15                                     | Would you like to stay at your current place of work for the rest of your worklife?                                                |                   |              |       |            |        |
| C16                                     | Do you think your work is extremely important to yourself?                                                                         |                   |              |       |            |        |
| Interpersonal relations and leadership: |                                                                                                                                    | never/hardly ever | occasionally | often | very often | always |
| C17                                     | At your place of work, are you informed well in advance about, for example, important decisions, changes, or plans for the future? |                   |              |       |            |        |
| C18                                     | Do you receive all the information that you need in order to do your work well?                                                    |                   |              |       |            |        |
| C19                                     | How often do you get help and support from your colleagues?                                                                        |                   |              |       |            |        |
| C20                                     | How often do you get help and support from your nearest superior?                                                                  |                   |              |       |            |        |
| C21                                     | How often do you talk with your superior about how well you carry out                                                              |                   |              |       |            |        |

|    |     |                                                                                             |                        |                   |         |                   |                        |
|----|-----|---------------------------------------------------------------------------------------------|------------------------|-------------------|---------|-------------------|------------------------|
| 1  |     | your work?                                                                                  |                        |                   |         |                   |                        |
| 2  |     |                                                                                             |                        |                   |         |                   |                        |
| 3  | C22 | How often do you talk with your colleagues about how well you carry out your work?          |                        |                   |         |                   |                        |
| 4  |     |                                                                                             |                        |                   |         |                   |                        |
| 5  |     |                                                                                             |                        |                   |         |                   |                        |
| 6  | C23 | Is there good co-operation between your colleagues at work?                                 |                        |                   |         |                   |                        |
| 7  |     |                                                                                             |                        |                   |         |                   |                        |
| 8  | C24 | Do you feel you are part of work team?                                                      |                        |                   |         |                   |                        |
| 9  |     |                                                                                             |                        |                   |         |                   |                        |
| 10 |     |                                                                                             |                        |                   |         |                   |                        |
| 11 |     | Quality of leadership                                                                       | to a very small extent | to a small extent | general | to a large extent | to a very large extent |
| 12 |     |                                                                                             |                        |                   |         |                   |                        |
| 13 | C25 | Is your immediate superior good at work-planning?                                           |                        |                   |         |                   |                        |
| 14 |     |                                                                                             |                        |                   |         |                   |                        |
| 15 | C26 | Is your immediate superior good at solving conflicts?                                       |                        |                   |         |                   |                        |
| 16 |     |                                                                                             |                        |                   |         |                   |                        |
| 17 |     |                                                                                             |                        |                   |         |                   |                        |
| 18 |     |                                                                                             |                        |                   |         |                   |                        |
| 19 |     |                                                                                             |                        |                   |         |                   |                        |
| 20 |     |                                                                                             |                        |                   |         |                   |                        |
| 21 |     |                                                                                             |                        |                   |         |                   |                        |
| 22 |     | Job insecurity                                                                              |                        |                   |         | No                | Yes                    |
| 23 |     |                                                                                             |                        |                   |         |                   |                        |
| 24 | C27 | Are you worried about becoming unemployed?                                                  |                        |                   |         |                   |                        |
| 25 |     |                                                                                             |                        |                   |         |                   |                        |
| 26 | C28 | Do you worry about that new technology making you / your work redundant?                    |                        |                   |         |                   |                        |
| 27 |     |                                                                                             |                        |                   |         |                   |                        |
| 28 | C29 | Are you worried about being difficult for you to find another job if you became unemployed? |                        |                   |         |                   |                        |
| 29 |     |                                                                                             |                        |                   |         |                   |                        |
| 30 | C30 | Are you worried about being transferred to another job against your will?                   |                        |                   |         |                   |                        |
| 31 |     |                                                                                             |                        |                   |         |                   |                        |
| 32 |     |                                                                                             |                        |                   |         |                   |                        |
| 33 |     | Job satisfaction                                                                            | strongly dissatisfied  | dissatisfied      | general | satisfied         | strongly satisfied     |
| 34 |     |                                                                                             |                        |                   |         |                   |                        |
| 35 | C31 | Are you satisfied with your job prospects?                                                  |                        |                   |         |                   |                        |
| 36 |     |                                                                                             |                        |                   |         |                   |                        |
| 37 | C32 | Are you satisfied with the hardware facilities in your work place?                          |                        |                   |         |                   |                        |
| 38 |     |                                                                                             |                        |                   |         |                   |                        |
| 39 | C33 | Are you satisfied with the way you play an ability at your work?                            |                        |                   |         |                   |                        |
| 40 |     |                                                                                             |                        |                   |         |                   |                        |
| 41 | C34 | Taken together, are you satisfied with your work?                                           |                        |                   |         |                   |                        |
| 42 |     |                                                                                             |                        |                   |         |                   |                        |
| 43 |     |                                                                                             |                        |                   |         |                   |                        |
| 44 |     |                                                                                             |                        |                   |         |                   |                        |
| 45 |     |                                                                                             |                        |                   |         |                   |                        |
| 46 |     |                                                                                             |                        |                   |         |                   |                        |
| 47 |     |                                                                                             |                        |                   |         |                   |                        |
| 48 |     |                                                                                             |                        |                   |         |                   |                        |
| 49 |     |                                                                                             |                        |                   |         |                   |                        |
| 50 |     |                                                                                             |                        |                   |         |                   |                        |
| 51 |     |                                                                                             |                        |                   |         |                   |                        |
| 52 |     |                                                                                             |                        |                   |         |                   |                        |
| 53 |     |                                                                                             |                        |                   |         |                   |                        |
| 54 |     |                                                                                             |                        |                   |         |                   |                        |
| 55 |     |                                                                                             |                        |                   |         |                   |                        |
| 56 |     |                                                                                             |                        |                   |         |                   |                        |
| 57 |     |                                                                                             |                        |                   |         |                   |                        |
| 58 |     |                                                                                             |                        |                   |         |                   |                        |
| 59 |     |                                                                                             |                        |                   |         |                   |                        |
| 60 |     |                                                                                             |                        |                   |         |                   |                        |

**Table S2.** SHSQ-25 score distribution in survey sample

| SHSQ-25 score | <i>n</i> | %     | Cumulative % |
|---------------|----------|-------|--------------|
| 0-10          | 52.0     | 6.5   | 6.5          |
| 10-20         | 128.0    | 16.1  | 22.6         |
| 20-30         | 180.0    | 22.6  | 45.2         |
| 30-40         | 182.0    | 22.8  | 68.0         |
| 40-50         | 140.0    | 17.6  | 85.6         |
| 50-60         | 71.0     | 8.9   | 94.5         |
| 60-70         | 32.0     | 4.0   | 98.5         |
| 70-80         | 8.0      | 1.0   | 99.5         |
| 80-90         | 4.0      | 0.5   | 100.0        |
| Total         | 797      | 100.0 |              |

**Table S3.** Sensitivity analyses of participant according suboptimal health status

| Demographics                | Total<br>(N=797) | SHSQ-25 (P75) |            |        | SHSQ-25 (P90) |           |        |
|-----------------------------|------------------|---------------|------------|--------|---------------|-----------|--------|
|                             | n (%)            | Non-SHS       | SHS        | P      | Non-SHS       | SHS       | P      |
| <b>Age group(years)</b>     |                  |               |            | <0.001 |               |           | 0.005  |
| 40~                         | 270 (33.9)       | 188 (30.9)    | 82 (43.4)  |        | 234 (32.2)    | 36 (50.7) |        |
| 45~                         | 245 (30.7)       | 188 (30.9)    | 57 (30.2)  |        | 228 (31.4)    | 17 (23.9) |        |
| 55~68                       | 282 (35.4)       | 232 (38.2)    | 50 (26.5)  |        | 264 (36.40)   | 18 (25.4) |        |
| <b>Gender</b>               |                  |               |            | <0.001 |               |           | <0.001 |
| Male                        | 243 (30.5)       | 213 (35.0)    | 30 (15.9)  |        | 239 (32.9)    | 4 (5.6)   |        |
| Female                      | 554 (69.5)       | 395 (65.0)    | 159 (84.1) |        | 487 (67.1)    | 67 (94.4) |        |
| <b>Education level</b>      |                  |               |            | 0.004  |               |           | 0.007  |
| High school and below       | 122 (15.3)       | 970 (16.0)    | 25 (13.2)  |        | 109 (15.0)    | 13 (18.3) |        |
| Junior college              | 321 (40.3)       | 225 (37.0)    | 96 (50.8)  |        | 284 (39.1)    | 37 (52.1) |        |
| University                  | 182 (22.8)       | 142 (23.4)    | 40 (21.2)  |        | 167 (23.0)    | 15 (21.1) |        |
| Graduate students and above | 172 (21.6)       | 144 (23.7)    | 28 (14.8)  |        | 166 (22.9)    | 6 (8.5)   |        |
| <b>occupation</b>           |                  |               |            | <0.001 |               |           | <0.001 |
| Nurses                      | 188 (23.6)       | 117 (19.2)    | 71 (37.6)  |        | 151 (20.8)    | 37 (52.1) |        |
| Medical technicians         | 187 (23.5)       | 137 (22.5)    | 50 (26.5)  |        | 168 (23.1)    | 19 (26.8) |        |
| Doctors                     | 208 (26.1)       | 173 (28.5)    | 35 (18.5)  |        | 201 (27.7)    | 7 (9.9)   |        |
| Others                      | 214 (26.9)       | 181 (29.8)    | 33 (17.5)  |        | 206 (28.4)    | 8 (11.3)  |        |
| <b>Physical exercise</b>    |                  |               |            | 0.012  |               |           | 0.045  |
| Yes                         | 363 (45.5)       | 292 (48.0)    | 71 (37.6)  |        | 339 (46.7)    | 24 (33.8) |        |
| No                          | 434 (54.5)       | 316 (52.0)    | 118 (62.4) |        | 387 (53.3)    | 47 (66.2) |        |
| <b>Smoking</b>              |                  |               |            | <0.001 |               |           | 0.002  |
| Yes                         | 93 (11.7)        | 87 (14.3)     | 6 (3.2)    |        | 92 (12.7)     | 1 (1.4)   |        |
| No/Quit                     | 704 (88.3)       | 521 (85.7)    | 183 (96.8) |        | 634 (87.3)    | 70 (98.6) |        |
| <b>Drinking</b>             |                  |               |            | 0.001  |               |           | 0.014  |
| Yes                         | 166 (20.8)       | 142 (23.4)    | 24 (12.7)  |        | 159 (21.9)    | 7 (9.9)   |        |
| No/Abstained                | 631 (79.2)       | 466 (76.6)    | 165 (87.3) |        | 567 (78.1)    | 64 (90.1) |        |
| <b>Night shift</b>          |                  |               |            | 0.800  |               |           | 0.801  |
| Yes                         | 331 (41.5)       | 251 (41.3)    | 80 (42.3)  |        | 303 (41.7)    | 28 (39.4) |        |
| No                          | 466 (58.5)       | 357 (58.7)    | 109 (57.7) |        | 423 (58.3)    | 43 (60.6) |        |
| <b>Weekly working hours</b> |                  |               |            | 0.022  |               |           | 0.067  |
| ≤40 hours                   | 270 (33.9)       | 219 (36.0)    | 51 (27.0)  |        | 253 (34.8)    | 17 (23.9) |        |
| >40 hours                   | 527 (66.1)       | 389 (64.0)    | 138 (73.0) |        | 473 (65.2)    | 54 (76.1) |        |

52 Noted: \*, P<0.01.

53  
54  
55  
56  
57  
58  
59  
60

**Table S4.** Test of internal consistency and interfactor correlations of the COPSOQ

| Factor (Cronbach's $\alpha$ )                    | N of Items | F <sub>1</sub> | F <sub>2</sub> | F <sub>3</sub> | F <sub>4</sub> | F <sub>5</sub> |
|--------------------------------------------------|------------|----------------|----------------|----------------|----------------|----------------|
| F <sub>1</sub> Demands (0.791)                   | 6          | 1              | —              | —              | —              | —              |
| F <sub>2</sub> Influence and development (0.820) | 10         | -0.067         | 1              | —              | —              | —              |
| F <sub>3</sub> Relation and leadership (0.891)   | 10         | -0.094*        | 0.606**        | 1              | —              | —              |
| F <sub>4</sub> Insecurity at work (0.830)        | 4          | 0.037**        | 0.002          | -0.004         | 1              | —              |
| F <sub>5</sub> Job satisfaction (0.881)          | 4          | -0.214**       | 0.306**        | 0.366**        | -0.027**       | 1              |

r correlation \* $p < 0.05$ ; \*\* $p < 0.01$

For peer review only



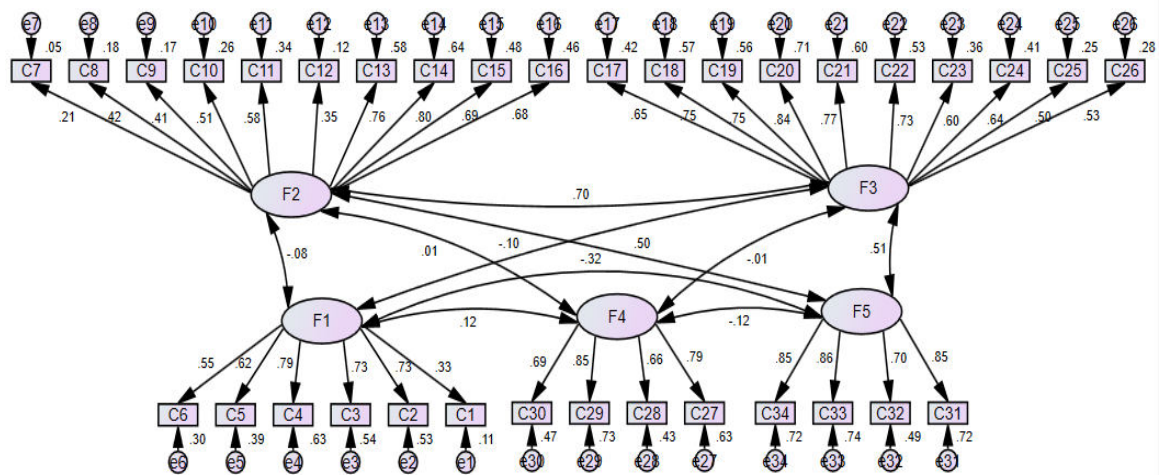

**Figure S1** Standardized coefficients for initial first-order confirmatory factor analysis of COPSOQ (M1a). The structural model consisted of five interrelated constructs, including F1 refers to Demands at work; F2, Influence and development; F3, Interpersonal relations and leadership; F4, Insecurity at work; F5, Job satisfaction. The observed variables, unobserved variables and measurement error were represented as rectangles, ellipses and circles respectively. The arrow between the unobserved variable and the observed variable represented a regression path and its number represented the standardized regression weight. The arrow between a small circle and the observed variable represented a measurement error term. The double-headed arrows represented the correlation between two unobserved variables (factor covariances) of the model. Confirmatory factor analysis (CFA) results didn't indicate good to adequate model fit:  $\chi^2=4216.39$ ; degrees of freedom (df) =517;  $\chi^2/df =8.16$ ; Comparative Fit Index (CFI) =0.737; Root Mean Square Error of Approximation (RMSEA) =0.095; Standardized Root Mean Square Residual (SRMR) =0.080.

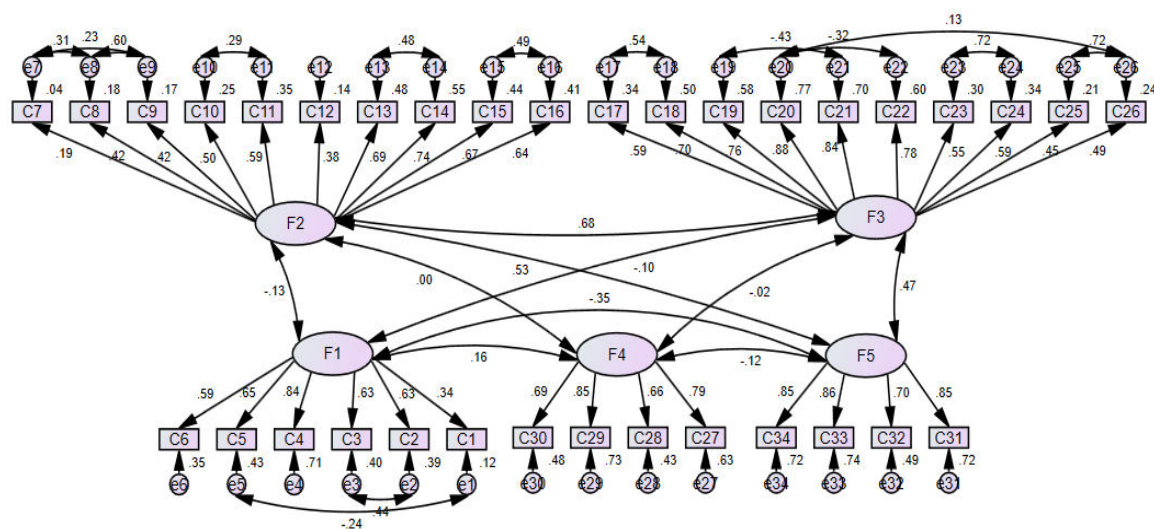

**Figure S2** Standardized coefficients for modified first-order confirmatory factor analysis of COPSOQ (M1b). The structural model consisted of five interrelated constructs, F1 refers to Demands at work; F2, Influence and development; F3, Interpersonal relations and leadership; F4, Insecurity at work; F5, Job satisfaction. The observed variables, unobserved variables and measurement error were represented as rectangles, ellipses and circles respectively. The arrow between the unobserved variable and the observed variable represented a regression path and its number represented the standardized regression weight. The arrow between a small circle and the observed variable represented a measurement error term. The double-headed arrows represented the correlation between two unobserved variables (factor covariances) of the model. Confirmatory factor analysis (CFA) results indicated good to adequate model fit:  $\chi^2=1699.40$ ; degrees of freedom ( $df$ )=503;  $\chi^2/df=3.40$ ; Comparative Fit Index (CFI)=0.915; Root Mean Square Error of Approximation (RMSEA)=0.055; Standardized Root Mean Square Residual(SRMR)=0.070.

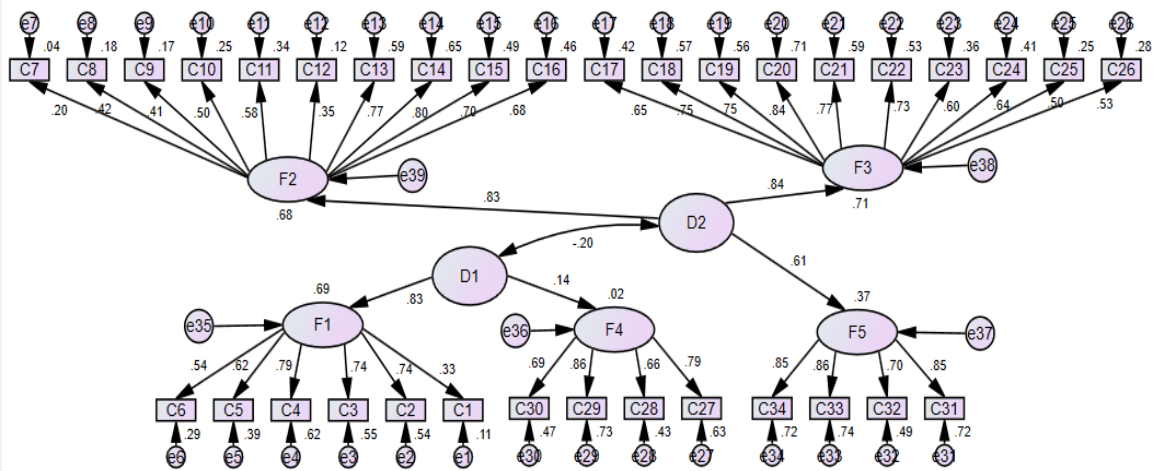

**Figure S3** Standardized coefficients for initial second-order confirmatory factor analysis of COPSOQ (M2a). The structural model consisted of seven interrelated constructs, F1 refers to Demands at work; F2, Influence and development; F3, Interpersonal relations and leadership; F4, Insecurity at work; F5, Job satisfaction; D1, negative psychosocial work stress factor; D2, positive psychosocial work stress factor. The observed variables, unobserved variables and measurement error were represented as rectangles, ellipses and circles respectively. The arrow between the unobserved variable and the observed variable represented a regression path and its number represented the standardized regression weight. The arrow between a small circle and the observed variable represented a measurement error term. The double-headed arrows represented the correlation between two unobserved variables (factor covariances) of the model. Confirmatory factor analysis (CFA) results didn't indicate good to adequate model fit:  $\chi^2=4276.30$ ; degrees of freedom ( $df$ ) =521;  $\chi^2/df=8.21$ ; Comparative Fit Index (CFI) =0.733; Root Mean Square Error of Approximation (RMSEA) =0.095; Standardized Root Mean Square Residual (SRMR) =0.085.

**STROBE 2007 (v4) Statement—Checklist of items that should be included in reports of *cross-sectional studies***

| Section/Topic                | Item # | Recommendation                                                                                                                                                                       | Reported on page # |
|------------------------------|--------|--------------------------------------------------------------------------------------------------------------------------------------------------------------------------------------|--------------------|
| <b>Title and abstract</b>    | 1      | (a) Indicate the study’s design with a commonly used term in the title or the abstract                                                                                               | 1, 2               |
|                              |        | (b) Provide in the abstract an informative and balanced summary of what was done and what was found                                                                                  | 2                  |
| <b>Introduction</b>          |        |                                                                                                                                                                                      |                    |
| Background/rationale         | 2      | Explain the scientific background and rationale for the investigation being reported                                                                                                 | 4                  |
| Objectives                   | 3      | State specific objectives, including any prespecified hypotheses                                                                                                                     | 5                  |
| <b>Methods</b>               |        |                                                                                                                                                                                      |                    |
| Study design                 | 4      | Present key elements of study design early in the paper                                                                                                                              | 5                  |
| Setting                      | 5      | Describe the setting, locations, and relevant dates, including periods of recruitment, exposure, follow-up, and data collection                                                      | 5, 6               |
| Participants                 | 6      | (a) Give the eligibility criteria, and the sources and methods of selection of participants                                                                                          | 5                  |
| Variables                    | 7      | Clearly define all outcomes, exposures, predictors, potential confounders, and effect modifiers. Give diagnostic criteria, if applicable                                             | 5, 6               |
| Data sources/<br>measurement | 8*     | For each variable of interest, give sources of data and details of methods of assessment (measurement). Describe comparability of assessment methods if there is more than one group | 5, 6               |
| Bias                         | 9      | Describe any efforts to address potential sources of bias                                                                                                                            | 7                  |
| Study size                   | 10     | Explain how the study size was arrived at                                                                                                                                            | 5                  |
| Quantitative variables       | 11     | Explain how quantitative variables were handled in the analyses. If applicable, describe which groupings were chosen and why                                                         | 7                  |
| Statistical methods          | 12     | (a) Describe all statistical methods, including those used to control for confounding                                                                                                | 7                  |
|                              |        | (b) Describe any methods used to examine subgroups and interactions                                                                                                                  | 7                  |
|                              |        | (c) Explain how missing data were addressed                                                                                                                                          | 7                  |
|                              |        | (d) If applicable, describe analytical methods taking account of sampling strategy                                                                                                   | N                  |
|                              |        | (e) Describe any sensitivity analyses                                                                                                                                                | 7                  |
| <b>Results</b>               |        |                                                                                                                                                                                      |                    |

|                          |     |                                                                                                                                                                                                              |                                        |
|--------------------------|-----|--------------------------------------------------------------------------------------------------------------------------------------------------------------------------------------------------------------|----------------------------------------|
| Participants             | 13* | (a) Report numbers of individuals at each stage of study—eg numbers potentially eligible, examined for eligibility, confirmed eligible, included in the study, completing follow-up, and analysed            | 8                                      |
|                          |     | (b) Give reasons for non-participation at each stage                                                                                                                                                         | 7                                      |
|                          |     | (c) Consider use of a flow diagram                                                                                                                                                                           | N                                      |
| Descriptive data         | 14* | (a) Give characteristics of study participants (eg demographic, clinical, social) and information on exposures and potential confounders                                                                     | Table 1 and 3                          |
|                          |     | (b) Indicate number of participants with missing data for each variable of interest                                                                                                                          | N                                      |
| Outcome data             | 15* | Report numbers of outcome events or summary measures                                                                                                                                                         | Online summary table S2, Table 3       |
| Main results             | 16  | (a) Give unadjusted estimates and, if applicable, confounder-adjusted estimates and their precision (eg, 95% confidence interval). Make clear which confounders were adjusted for and why they were included | Page 11 and Table 4                    |
|                          |     | (b) Report category boundaries when continuous variables were categorized                                                                                                                                    | 7                                      |
|                          |     | (c) If relevant, consider translating estimates of relative risk into absolute risk for a meaningful time period                                                                                             | N                                      |
| Other analyses           | 17  | Report other analyses done—eg analyses of subgroups and interactions, and sensitivity analyses                                                                                                               | 8-11, Table 4, Online summary table S3 |
| <b>Discussion</b>        |     |                                                                                                                                                                                                              |                                        |
| Key results              | 18  | Summarise key results with reference to study objectives                                                                                                                                                     | 11                                     |
| Limitations              | 19  | Discuss limitations of the study, taking into account sources of potential bias or imprecision. Discuss both direction and magnitude of any potential bias                                                   | 3                                      |
| Interpretation           | 20  | Give a cautious overall interpretation of results considering objectives, limitations, multiplicity of analyses, results from similar studies, and other relevant evidence                                   | 12, 13                                 |
| Generalisability         | 21  | Discuss the generalisability (external validity) of the study results                                                                                                                                        | 3                                      |
| <b>Other information</b> |     |                                                                                                                                                                                                              |                                        |
| Funding                  | 22  | Give the source of funding and the role of the funders for the present study and, if applicable, for the original study on which the present article is based                                                | 19                                     |

\*Give information separately for cases and controls in case-control studies and, if applicable, for exposed and unexposed groups in cohort and cross-sectional studies.

**Note:** An Explanation and Elaboration article discusses each checklist item and gives methodological background and published examples of transparent reporting. The STROBE checklist is best used in conjunction with this article (freely available on the Web sites of PLoS Medicine at <http://www.plosmedicine.org/>, Annals of Internal Medicine at <http://www.annals.org/>, and Epidemiology at <http://www.epidem.com/>). Information on the STROBE Initiative is available at [www.strobe-statement.org](http://www.strobe-statement.org).
