# Supplementary material for: Relationship between stress-related psychosocial work factors and suboptimal health among Chinese medical staff: a cross-sectional study
Source: PubMed Central journal article supplement — BMJ Open. 2018 Mar 6;8(3):e018485. doi: 10.1136/bmjopen-2017-018485 (PMC5855386; doi:10.1136/bmjopen-2017-018485), 2018-03-06
Supplement: bmjopen-2017-018485supp001.pdf [file bmjopen-2017-018485supp001.pdf]

**Table S1.** COPSOQ questions used in stress-related psychosocial work factors survey

| Demands at work:                        |                                                                                                                                    | never/hardly ever | occasionally | often | very often | always |
|-----------------------------------------|------------------------------------------------------------------------------------------------------------------------------------|-------------------|--------------|-------|------------|--------|
| C1                                      | Do you have to work very fast?                                                                                                     |                   |              |       |            |        |
| C2                                      | Is your workload unevenly distributed, so that it piles up?                                                                        |                   |              |       |            |        |
| C3                                      | How often do you not have time to complete all your work tasks?                                                                    |                   |              |       |            |        |
| C4                                      | Does your work put you in emotionally disturbing situations?                                                                       |                   |              |       |            |        |
| C5                                      | Do you get emotionally involved in your work?                                                                                      |                   |              |       |            |        |
| C6                                      | Does your work require that you hide your feelings?                                                                                |                   |              |       |            |        |
| Influence and development:              |                                                                                                                                    | never/hardly ever | occasionally | often | very often | always |
| C7                                      | Do you have a large degree of influence on the decisions concerning your work?                                                     |                   |              |       |            |        |
| C8                                      | Can you influence the amount of work assigned to you?                                                                              |                   |              |       |            |        |
| C9                                      | Do you have any influence on what you do at work?                                                                                  |                   |              |       |            |        |
| C10                                     | Can you play a leading role in the work?                                                                                           |                   |              |       |            |        |
| C11                                     | Do you have the possibility of learning new things through your work?                                                              |                   |              |       |            |        |
| C12                                     | Can you decide when to take a break?                                                                                               |                   |              |       |            |        |
| C13                                     | Is your work meaningful?                                                                                                           |                   |              |       |            |        |
| C14                                     | Do you feel that the work you do is important?                                                                                     |                   |              |       |            |        |
| C15                                     | Would you like to stay at your current place of work for the rest of your worklife?                                                |                   |              |       |            |        |
| C16                                     | Do you think your work is extremely important to yourself?                                                                         |                   |              |       |            |        |
| Interpersonal relations and leadership: |                                                                                                                                    | never/hardly ever | occasionally | often | very often | always |
| C17                                     | At your place of work, are you informed well in advance about, for example, important decisions, changes, or plans for the future? |                   |              |       |            |        |
| C18                                     | Do you receive all the information that you need in order to do your work well?                                                    |                   |              |       |            |        |
| C19                                     | How often do you get help and support from your colleagues?                                                                        |                   |              |       |            |        |
| C20                                     | How often do you get help and support from your nearest superior?                                                                  |                   |              |       |            |        |
| C21                                     | How often do you talk with your superior about how well you carry out                                                              |                   |              |       |            |        |

|                       |                                                                                             |                        |                   |         |                   |                        |
|-----------------------|---------------------------------------------------------------------------------------------|------------------------|-------------------|---------|-------------------|------------------------|
|                       | your work?                                                                                  |                        |                   |         |                   |                        |
| C22                   | How often do you talk with your colleagues about how well you carry out your work?          |                        |                   |         |                   |                        |
| C23                   | Is there good co-operation between your colleagues at work?                                 |                        |                   |         |                   |                        |
| C24                   | Do you feel you are part of work team?                                                      |                        |                   |         |                   |                        |
| Quality of leadership |                                                                                             | to a very small extent | to a small extent | general | to a large extent | to a very large extent |
| C25                   | Is your immediate superior good at work-planning?                                           |                        |                   |         |                   |                        |
| C26                   | Is your immediate superior good at solving conflicts?                                       |                        |                   |         |                   |                        |
| Job insecurity        |                                                                                             |                        |                   | No      |                   | Yes                    |
| C27                   | Are you worried about becoming unemployed?                                                  |                        |                   |         |                   |                        |
| C28                   | Do you worry about that new technology making you / your work redundant?                    |                        |                   |         |                   |                        |
| C29                   | Are you worried about being difficult for you to find another job if you became unemployed? |                        |                   |         |                   |                        |
| C30                   | Are you worried about being transferred to another job against your will?                   |                        |                   |         |                   |                        |
| Job satisfaction      |                                                                                             | strongly dissatisfied  | dissatisfied      | general | satisfied         | strongly satisfied     |
| C31                   | Are you satisfied with your job prospects?                                                  |                        |                   |         |                   |                        |
| C32                   | Are you satisfied with the hardware facilities in your work place?                          |                        |                   |         |                   |                        |
| C33                   | Are you satisfied with the way you play an ability at your work?                            |                        |                   |         |                   |                        |
| C34                   | Taken together, are you satisfied with your work?                                           |                        |                   |         |                   |                        |

**Table S2.** SHSQ-25 score distribution in survey sample

| SHSQ-25 score | <i>n</i> | %     | Cumulative % |
|---------------|----------|-------|--------------|
| 0-10          | 52.0     | 6.5   | 6.5          |
| 10-20         | 128.0    | 16.1  | 22.6         |
| 20-30         | 180.0    | 22.6  | 45.2         |
| 30-40         | 182.0    | 22.8  | 68.0         |
| 40-50         | 140.0    | 17.6  | 85.6         |
| 50-60         | 71.0     | 8.9   | 94.5         |
| 60-70         | 32.0     | 4.0   | 98.5         |
| 70-80         | 8.0      | 1.0   | 99.5         |
| 80-90         | 4.0      | 0.5   | 100.0        |
| Total         | 797      | 100.0 |              |

**Table S3.** Sensitivity analyses of participant according suboptimal health status

| Demographics                | Total<br>(N=797) | SHSQ-25 (P75) |            |        | SHSQ-25 (P90) |           |        |
|-----------------------------|------------------|---------------|------------|--------|---------------|-----------|--------|
|                             | n (%)            | Non-SHS       | SHS        | P      | Non-SHS       | SHS       | P      |
| <b>Age group(years)</b>     |                  |               |            | <0.001 |               |           | 0.005  |
| 40~                         | 270 (33.9)       | 188 (30.9)    | 82 (43.4)  |        | 234 (32.2)    | 36 (50.7) |        |
| 45~                         | 245 (30.7)       | 188 (30.9)    | 57 (30.2)  |        | 228 (31.4)    | 17 (23.9) |        |
| 55~68                       | 282 (35.4)       | 232 (38.2)    | 50 (26.5)  |        | 264 (36.40)   | 18 (25.4) |        |
| <b>Gender</b>               |                  |               |            | <0.001 |               |           | <0.001 |
| Male                        | 243 (30.5)       | 213 (35.0)    | 30 (15.9)  |        | 239 (32.9)    | 4 (5.6)   |        |
| Female                      | 554 (69.5)       | 395 (65.0)    | 159 (84.1) |        | 487 (67.1)    | 67 (94.4) |        |
| <b>Education level</b>      |                  |               |            | 0.004  |               |           | 0.007  |
| High school and below       | 122 (15.3)       | 970 (16.0)    | 25 (13.2)  |        | 109 (15.0)    | 13 (18.3) |        |
| Junior college              | 321 (40.3)       | 225 (37.0)    | 96 (50.8)  |        | 284 (39.1)    | 37 (52.1) |        |
| University                  | 182 (22.8)       | 142 (23.4)    | 40 (21.2)  |        | 167 (23.0)    | 15 (21.1) |        |
| Graduate students and above | 172 (21.6)       | 144 (23.7)    | 28 (14.8)  |        | 166 (22.9)    | 6 (8.5)   |        |
| <b>occupation</b>           |                  |               |            | <0.001 |               |           | <0.001 |
| Nurses                      | 188 (23.6)       | 117 (19.2)    | 71 (37.6)  |        | 151 (20.8)    | 37 (52.1) |        |
| Medical technicians         | 187 (23.5)       | 137 (22.5)    | 50 (26.5)  |        | 168 (23.1)    | 19 (26.8) |        |
| Doctors                     | 208 (26.1)       | 173 (28.5)    | 35 (18.5)  |        | 201 (27.7)    | 7 (9.9)   |        |
| Others                      | 214 (26.9)       | 181 (29.8)    | 33 (17.5)  |        | 206 (28.4)    | 8 (11.3)  |        |
| <b>Physical exercise</b>    |                  |               |            | 0.012  |               |           | 0.045  |
| Yes                         | 363 (45.5)       | 292 (48.0)    | 71 (37.6)  |        | 339 (46.7)    | 24 (33.8) |        |
| No                          | 434 (54.5)       | 316 (52.0)    | 118 (62.4) |        | 387 (53.3)    | 47 (66.2) |        |
| <b>Smoking</b>              |                  |               |            | <0.001 |               |           | 0.002  |
| Yes                         | 93 (11.7)        | 87 (14.3)     | 6 (3.2)    |        | 92 (12.7)     | 1 (1.4)   |        |
| No/Quit                     | 704 (88.3)       | 521 (85.7)    | 183 (96.8) |        | 634 (87.3)    | 70 (98.6) |        |
| <b>Drinking</b>             |                  |               |            | 0.001  |               |           | 0.014  |
| Yes                         | 166 (20.8)       | 142 (23.4)    | 24 (12.7)  |        | 159 (21.9)    | 7 (9.9)   |        |
| No/Abstained                | 631 (79.2)       | 466 (76.6)    | 165 (87.3) |        | 567 (78.1)    | 64 (90.1) |        |
| <b>Night shift</b>          |                  |               |            | 0.800  |               |           | 0.801  |
| Yes                         | 331 (41.5)       | 251 (41.3)    | 80 (42.3)  |        | 303 (41.7)    | 28 (39.4) |        |
| No                          | 466 (58.5)       | 357 (58.7)    | 109 (57.7) |        | 423 (58.3)    | 43 (60.6) |        |
| <b>Weekly working hours</b> |                  |               |            | 0.022  |               |           | 0.067  |
| ≤40 hours                   | 270 (33.9)       | 219 (36.0)    | 51 (27.0)  |        | 253 (34.8)    | 17 (23.9) |        |
| >40 hours                   | 527 (66.1)       | 389 (64.0)    | 138 (73.0) |        | 473 (65.2)    | 54 (76.1) |        |

Noted: \*, P&lt;0.01.

**Table S4.** Test of internal consistency and interfactor correlations of the COPSOQ

| Factor (Cronbach's $\alpha$ )                    | N of Items | F <sub>1</sub> | F <sub>2</sub> | F <sub>3</sub> | F <sub>4</sub> | F <sub>5</sub> |
|--------------------------------------------------|------------|----------------|----------------|----------------|----------------|----------------|
| F <sub>1</sub> Demands (0.791)                   | 6          | 1              | —              | —              | —              | —              |
| F <sub>2</sub> Influence and development (0.820) | 10         | -0.067         | 1              | —              | —              | —              |
| F <sub>3</sub> Relation and leadership (0.891)   | 10         | -0.094 *       | 0.606 **       | 1              | —              | —              |
| F <sub>4</sub> Insecurity at work (0.830)        | 4          | 0.037 **       | 0.002          | -0.004         | 1              | —              |
| F <sub>5</sub> Job satisfaction (0.881)          | 4          | -0.214 **      | 0.306 **       | 0.366 **       | -0.027 **      | 1              |

r correlation \* $p < 0.05$ ; \*\* $p < 0.01$
